# Supplementary material for: Antibody-Based Therapeutic Interventions for Amyotrophic Lateral Sclerosis: A Systematic Literature Review
Source: Front Neurosci. 2021 Nov 29;15:790114. doi: 10.3389/fnins.2021.790114 (PMC8667723; doi:10.3389/fnins.2021.790114)
Supplement: Supplementary file 1 [file Table_1.XLSX]

## Sheet: Suppl. Table 1
Supplementary Table 1
Articles submitted to title and abstract evaluation
Authors	Year	Title	Journal
A. A. Amato	2016	Ongoing developments in IBM	Journal of Neuromuscular Diseases
A. A. Argyriou; P. Karanasios; A. Papapostolou; P. Loukopoulou; A. Makridou; M. Marangos; N. Makris	2018	Neurobrucellosis presenting as clinically definite amyotrophic lateral sclerosis	Int J Neurosci
A. A. Seyhan	2011	RNAi: A potential new class of therapeutic for human genetic disease	Human Genetics
A. A.-.-G. Rizvanov, D. S., Salafutdinov,, II, Kudryashova, N. V., Bashirov, F. V., Kiyasov, A. P., Yalvac, M. E., Gazizov, I. M., Kaligin, M. S., Sahin, F., Mukhamedyarov, M. A., Palotas, A., Islamov, R. R.	2011	Genetically modified human umbilical cord blood cells expressing vascular endothelial growth factor and fibroblast growth factor 2 differentiate into glial cells after transplantation into amyotrophic lateral sclerosis transgenic mice	Experimental biology and medicine (Maywood, N.J.)
A. Bafana; S. Dutt; A. Kumar; S. Kumar; P. S. Ahuja	2011	The basic and applied aspects of superoxide dismutase	Journal of Molecular Catalysis B: Enzymatic
A. Barp; F. Gerardi; A. Lizio; V. A. Sansone; C. Lunetta	2020	Emerging Drugs for the Treatment of Amyotrophic Lateral Sclerosis: A Focus on Recent Phase 2 Trials	Expert Opinion on Emerging Drugs
A. Bickel; B. Neundorfer; M. J. Hecht; M. J. Hilz	2001	Multifocal motor neuropathy - state of diagnosis and therapy	Nervenheilkunde
A. Bougea; E. Anagnostou; E. Stamboulis; E. Kararizou	2014	Amyotrophic lateral sclerosis developing during adalimumab therapy for psoriatic arthritis	Rev Neurol (Paris)
A. C. Rosa; N. Bruni; G. Meineri; D. Corsi; N. Cavi; D. Gastaldi; F. Dosio	2021	Strategies to expand the therapeutic potential of superoxide dismutase by exploiting delivery approaches	International Journal of Biological Macromolecules
A. C. Ludolph, K.U.	1999	Problems and pitfalls in the diagnosis of ALS	Journal of the neurological sciences
A. Casanovas; S. Salvany; R. Sabater; O. Tarabal; V. Lahoz; L. Piedrafita; S. Hernández; J. Calderó; J. Esquerda	2016	Neuregulin-1-ErbB signaling module is associated with afferent c-type cholinergic terminals on ALS vulnerable motoneurons and involved in motoneuron diseases	Amyotrophic Lateral Sclerosis and Frontotemporal Degeneration
A. Chakraborty; S. Brauer; A. Diwan	2020	Possible therapies of Parkinson's disease: A review	Journal of Clinical Neuroscience
A. Chegini; M. Moghadami; A. H. Maghary	2020	Therapeutic Plasma Exchange in Tehran Between 2011 and 2014	Therapeutic Apheresis and Dialysis
A. Czaplinski; A. J. Steck	2002	Antibody testing in peripheral neuropathies: A critical approach	Schweizer Archiv fur Neurologie und Psychiatrie
A. E.-.-P. Visser, R., Pulit, S. L., van Rheenen, W., Raaphorst, J., van der Kooi, A. J., Ricano-Ponce, I., Wijmenga, C., Otten, H. G., Veldink, J. H., van den Berg, L. H.	2017	No association between gluten sensitivity and amyotrophic lateral sclerosis	Journal of neurology
A. G. Arroyo; L. Genís; P. Gonzalo; S. Matías-Román; A. Pollán; B. G. Gálvez	2007	Matrix metalloproteinases: New routes to the use of MT1-MMP as a therapeutic target in angiogenesis-related disease	Current Pharmaceutical Design
A. G. Barbeito; L. Martinez-Palma; M. R. Vargas; M. Pehar; N. Manay; J. S. Beckman; L. Barbeito; P. Cassina	2010	Lead exposure stimulates VEGF expression in the spinal cord and extends survival in a mouse model of ALS	Neurobiology of Disease
A. G. Boghdadi; L. Teo; J. A. Bourne	2018	The Involvement of the Myelin-Associated Inhibitors and Their Receptors in CNS Plasticity and Injury	Molecular Neurobiology
A. Greiner; B. Schmausser; K. Petzold; H. Kruger; A. Marx	1996	Neuronal targets of serum and cerebrospinal fluid autoantibodies in amyotrophic lateral sclerosis	Acta Neuropathologica
A. H.-.-H. Pullen, P.	2000	Ultrastructural analysis of spinal motoneurones from mice treated with IgG from ALS patients, healthy individuals, or disease controls	Journal of the neurological sciences
A. J. Percy; J. Yang; A. G. Chambers; R. Simon; D. B. Hardie; C. H. Borchers	2014	Multiplexed MRM with internal standards for cerebrospinal fluid candidate protein biomarker quantitation	Journal of Proteome Research
A. J. Steck	2008	The clinician-scientist in neurology	Schweizer Archiv fur Neurologie und Psychiatrie
A. J. Steck; A. Czaplinski; S. Renaud	2008	Inflammatory Demyelinating Neuropathies and Neuropathies Associated with Monoclonal Gammopathies: Treatment Update	Neurotherapeutics
A. J.-.-P. Kornberg, A.	1995	Chronic motor neuropathies: diagnosis, therapy, and pathogenesis	Annals of neurology
A. K. Saini; S. Chandra; A. K. Rai	2018	Lambert-eaton myasthenic syndrome: A very rare and tortuously exasperating facet of pre-synaptic disorder of neuromuscular junction	Current Immunology Reviews
A. Kia; K. McAvoy; K. Krishnamurthy; D. Trotti; P. Pasinelli	2018	Astrocytes expressing ALS-linked mutant FUS induce motor neuron death through release of tumor necrosis factor-alpha	Glia
A. Kushnir; A. R. Marks	2012	Ryanodine receptor patents	Recent Patents on Biotechnology
A. L. Rosenbloom	2009	Mecasermin (recombinant human insulin-like growth factor I)	Advances in Therapy
A. L. Strayer; C. N. Dennys-Rivers; K. C. Ricart; N. Bae; J. S. Beckman; M. C. Franco; A. G. Estevez	2019	Highlight article: Ligand-independent activation of the P2X7 receptor by Hsp90 inhibition stimulates motor neuron apoptosis	Experimental Biology and Medicine
A. M. C. Lynch, M.; Prinjha, R.; Kumar, U.; Stubbs, R.; Wuerthner, J.	2015	Non-clinical development of ozanezumab: a humanised antibody targeting the amino terminus of neurite outgrowth inhibitor A (Nogo-A)	Toxicology Research
A. M. Chow; P. Mok; D. Xiao; S. Khalouei; I. R. Brown	2010	Heteromeric complexes of heat shock protein 70 (HSP70) family members, including Hsp70B′, in differentiated human neuronal cells	Cell Stress and Chaperones
A. M. Lavrov, V.; Genge, A.; Van Den Berg, L. H.; Robberecht, W.; Ludolph, A.; Chio, A.; Kim, S. H.; Leigh, N.; Kiernan, M.; Shefner, J.; Desnuelle, C.; Morrison, K. E.; Petri, S.; Boswell, D.; Temple, J.; Mohindra, R.; Davies, M.; Bullman, J.; Rees, P.	2015	A phase II study of ozanezumab in amyotrophic lateral sclerosis	Annals of Neurology
A. Maier; N. Deigendesch; K. Müller; J. H. Weishaupt; A. Krannich; R. Röhle; F. Meissner; K. Molawi; C. Münch; T. Holm; R. Meyer; T. Meyer; A. Zychlinsky	2015	Interleukin-1 Antagonist Anakinra in Amyotrophic Lateral Sclerosis--A Pilot Study	PLoS One
A. Malaspina; F. Puentes; S. Amor	2015	Disease origin and progression in amyotrophic lateral sclerosis: an immunology perspective	International Immunology
A. Moshiri; A. M. Sharifi; A. Oryan	2017	Current Knowledge, Drug-Based Therapeutic Options and Future Directions in Managing Osteoporosis	Clinical Reviews in Bone and Mineral Metabolism
A. Moszczynski; A. McKee; W. Strong; M. Strong	2016	Phosphothreonine175 and phosphothreonine231 expression in chronic traumatic encephalopathy (CTE) and chronic traumatic encephalomyelopathy-therapeutic implications	Neurology
A. Moszczynski; J. Gopaul; P. McCunn; K. Volkening; M. Harvey; R. Bartha; S. Schmid; M. Strong	2017	ALSci associate pathological phosphorylation of Thr175 tau induces a tau proteinopathy in vivo	Amyotrophic Lateral Sclerosis and Frontotemporal Degeneration
A. Moutal; K. A. White; A. Chefdeville; R. N. Laufmann; P. F. Vitiello; D. Feinstein; J. M. Weimer; R. Khanna	2019	Dysregulation of CRMP2 Post-Translational Modifications Drive Its Pathological Functions	Molecular Neurobiology
A. Mullard	2015	Stem-cell discovery platforms yield first clinical candidates	Nature Reviews Drug Discovery
A. Mullard	2011	Success of immunomodulators in MS shifts discovery focus to neuroprotection	Nature Reviews Drug Discovery
A. Musarò	2013	Understanding ALS: new therapeutic approaches	Febs j
A. N. Cammarota, M.; Rivero, A.; Garcia, H.	2001	Multifocal motor neuropathy. Immediate response to intravenous immunoglobulin	Medicina-Buenos Aires
A. Nowacek; L. M. Kosloski; H. E. Gendelman	2009	Neurodegenerative disorders and nanoformulated drug development	Nanomedicine
A. Pestronk	1991	Invited review: motor neuropathies, motor neuron disorders, and antiglycolipid antibodies	Muscle & nerve
A. Pestronk; R. N. Adams; R. W. Kuncl; D. B. Drachman; L. L. Clawson; D. R. Cornblath	1989	Differential effects of prednisone and cyclophosphamide on autoantibodies in human neuromuscular disorders	Neurology
A. Philippidis	2012	Gene therapy briefs	Human Gene Therapy
A. Q. McCampbell, F.; Ehrenfels, C.; Luo, Y.; Sun, L.; Dupage, A.; Zhang, M.; Rhodes, K.; Weinreb, P.; Ambrose, C.	2013	Administration of antibodies for misfolded SOD1 prolong survival in the SOD1-G93A mouse	Amyotrophic Lateral Sclerosis and Frontotemporal Degeneration
A. R. Bentivoglio; A. Del Grande; M. Petracca; T. Ialongo; L. Ricciardi	2015	Clinical differences between botulinum neurotoxin type A and B	Toxicon
A. R. Chapman	2019	What can we learn from California Institute for Regenerative Medicine's first 50 clinical trials?	Regenerative Medicine
A. Riahi; J. Zaouali; I. Bedoui; M. Messelmani; M. Mansour; R. Mrissa	2017	Paraneoplastic motor neuron disease: A descriptive and prognostic study about five cases	Journal of the Neurological Sciences
A. S.-.-M. Zubair, R., Amrami, K. K., Crum, B. A.	2018	Case of Early Amyotrophic Lateral Sclerosis With Prominent Magnetic Resonance Imaging Plexus Abnormalities	Journal of clinical neuromuscular disease
A. Sazci; H. A. Idrisoglu	2010	Neurodegenerative disorders' epidemiology, clinics, genetics, pharmacogenetics and imaging	Clinical Genetics
A. Sowa-Staszczak; M. Opalińska; M. Trofimiuk-Müldner; W. Lenda-Tracz; M. Buziak-Bereza; A. Brzozowska-Czarnek; A. Hubalewska-Dydejczyk	2017	Use of 18F-FDG PET/CT in early diagnosis of primary neoplasm site in patients with neurologic paraneoplastic syndromes	European Journal of Nuclear Medicine and Molecular Imaging
A. Tyndall; R. Saccardi	2005	Haematopoietic stem cell transplantation in the treatment of severe autoimmune disease: Results from phase I/II studies, prospective randomized trials and future directions	Clinical and Experimental Immunology
A. Vinaiphat; S. K. Sze	2019	Clinical implications of extracellular vesicles in neurodegenerative diseases	Expert Review of Molecular Diagnostics
A. Vogrig; B. Joubert; A. Maureille; L. Thomas; E. Bernard; N. Streichenberger; F. Cotton; F. Ducray; J. Honnorat	2019	Motor neuron involvement in anti-Ma2-associated paraneoplastic neurological syndrome	Journal of Neurology
A. Volpi	2004	Epstein-Barr virus and human herpesvirus type 8 infections of the central nervous system	Herpes : the journal of the IHMF
A. W. Kunbaz, A. E.; Perwein, M. K.; Fereidan-Esfahani, M.; Rodriguez, M.	2018	A natural human monoclonal antibody protects from axonal injury in different CNS degenerative disease models	Future Neurology
A. Z. Denic, L.; Wootla, B.; Warrington, A. E.; Rodriguez, M.	2012	A recombinant human neuron-binding IgM promotes survival and protects spinal cord anterior horn cells in a transgenic murine model of amyotrophic lateral sclerosis	Annals of Neurology
A.-.-B. Berges, J., Bates, S., Krull, D., Williams, N., Chen, C.	2015	Ozanezumab dose selection for amyotrophic lateral sclerosis by pharmacokinetic-pharmacodynamic modelling of immunohistochemistry data from patient muscle biopsies	PloS one
A.-.-B. Messer, D. C.	2020	Optimizing intracellular antibodies (intrabodies/nanobodies) to treat neurodegenerative disorders	Neurobiology of disease
A.-.-C. Pestronk, D. R., Ilyas, A. A., Baba, H., Quarles, R. H., Griffin, J. W., Alderson, K., Adams, R. N.	1988	A treatable multifocal motor neuropathy with antibodies to GM1 ganglioside	Annals of neurology
A.-.-D. Sengupta-Ghosh, S. L., Xie, L., Barck, K. H., Jiang, Z., Earr, T., Imperio, J., Phu, L., Budayeva, H. G., Kirkpatrick, D. S., Cai, H., Eastham-Anderson, J., Ngu, H., Foreman, O., Hedehus, M., Reichelt, M., Hotzel, I., Shang, Y., Carano, R. A. D., Ayalon, G., Easton, A.	2019	Muscle specific kinase (MuSK) activation preserves neuromuscular junctions in the diaphragm but is not sufficient to provide a functional benefit in the SOD1(G93A) mouse model of ALS	Neurobiology of disease
A.-.-F. Ido, H., Urushitani, M.	2011	Protein misdirection inside and outside motor neurons in Amyotrophic Lateral Sclerosis (ALS): a possible clue for therapeutic strategies	International journal of molecular sciences
A.-.-G. Borjesson, B., Olaisson, H., Waldenlind, L.	2013	Is there a link between amyotrophic lateral sclerosis and treatment with TNF-alpha inhibitors?	Upsala journal of medical sciences
A.-.-H. Hubers, V., Petri, S., Kollewe, K., Hermann, A., Storch, A., Hanisch, F., Zierz, S., Rosenbohm, A., Ludolph, A. C., Dorst, J.	2016	Clinical features and differential diagnosis of flail arm syndrome	Journal of neurology
A.-.-I. Dolei, G., Piu, C., Serra, C.	2019	Expression of HERV Genes as Possible Biomarker and Target in Neurodegenerative Diseases	International journal of molecular sciences
A.-.-L. Patel, F., Shepherd, S. A.	2020	Newer Immunotherapies for the Treatment of Acute Neuromuscular Disease in the Critical Care Unit	Current treatment options in neurology
A.-.-M. Calvo, C., Balma, M., Chio, A.	2010	Involvement of immune response in the pathogenesis of amyotrophic lateral sclerosis: a therapeutic opportunity?	CNS & neurological disorders drug targets
A.-.-M. Okado-Matsumoto, T., Fujii, J., Taniguchi, N.	2000	Gain in functions of mutant Cu,Zn-superoxide dismutases as a causative factor in familial amyotrophic lateral sclerosis: less reactive oxidant formation but high spontaneous aggregation and precipitation	Free radical research
A.-.-N. Matsuo, S., Akiguchi, I.	2000	Immunohistochemical localization of glial cell line-derived neurotrophic factor family receptor alpha-1 in the rat brain: confirmation of expression in various neuronal systems	Brain research
A.-.-P. Caragounis, K. A., Soon, C. P., Filiz, G., Masters, C. L., Li, Q. X., Crouch, P. J., White, A. R.	2010	Zinc induces depletion and aggregation of endogenous TDP-43	Free radical biology & medicine
B. Brooks; E. Bravver; V. Langford; M. Alwan; N. Smith; N. Lucas; M. Nichols; S. Belcher; C. Lary; J. Nemeth; P. Russo; K. Wright; A. Ward; S. Holsten; M. Fischer; W. Bockenek; U. Desai; S. C. Lindblom; T. Pacicco; M. Sanjak	2015	Amyotrophic lateral sclerosis (ALS) with laboratory abnormalities of unknown significance (LAUS)-where does it begin and where does it end?	Neurology
B. J. Byrne; T. Geberhiwot; B. A. Barshop; R. Barohn; D. Hughes; D. Bratkovic; C. Desnuelle; P. Laforet; E. Mengel; M. Roberts; P. Haroldsen; K. Reilley; K. Jayaram; K. Yang; L. Walsh	2017	A study on the safety and efficacy of reveglucosidase alfa in patients with late-onset Pompe disease	Orphanet J Rare Dis
B. J. Pleuvry	2009	Drugs used to treat muscle and joint disease	Anaesthesia and Intensive Care Medicine
B. K.-.-A. Ho, M. E., Colom, L. V., Mohamed, A. H., Serrano, F., Appel, S. H.	1996	Expression of calbindin-D28K in motoneuron hybrid cells after retroviral infection with calbindin-D28K cDNA prevents amyotrophic lateral sclerosis IgG-mediated cytotoxicity	Proceedings of the National Academy of Sciences of the United States of America
B. Lupone; R. M. Surià Alba	2013	42nd annual meeting of the society for neuroscience, New Orleans, Louisiana, USA - October 13-17, 2012	Drugs of the Future
B. M. Greenberg	2015	Placebo studies should not be undertaken in NMO - No	Multiple Sclerosis
B. M. Greenberg; P. A. Calabresi	2008	Future research directions in multiple sclerosis therapies	Seminars in Neurology
B. M. Morrison; J. L. Lachey; L. C. Warsing; B. L. Ting; A. E. Pullen; K. W. Underwood; R. Kumar; D. Sako; A. Grinberg; V. Wong; E. Colantuoni; J. S. Seehra; K. R. Wagner	2009	A soluble activin type IIB receptor improves function in a mouse model of amyotrophic lateral sclerosis	Experimental Neurology
B. Morimoto	2009	Drug development for neurodegenerative diseases - A marcus evans conference	IDrugs
B. Pirofsky; J. C. Ramirez Mateos; E. J. Bardana Jr; H. Reid	1972	Medical uses of antithymocyte antisera therapy	BEHRING INST.MITT.
B. R. W. Wright, A. E.; Edberg, D. E.; Rodriguez, M.	2009	Cellular Mechanisms of Central Nervous System Repair by Natural Autoreactive Monoclonal Antibodies	Archives of Neurology
B. R.-T. Solomon, P.	2013	App a common target for neuropathology treatment	Alzheimer's and Dementia
B. Turner; R. Sheean; F. McKay; E. Cretney; C. Bye; N. Perera; D. Tomas; S. Nutt; M. Kiernan; S. Vucic	2019	Regulatory T cell modulation of neuroinflammation and progression in amyotrophic lateral sclerosis	Clinical Neurology
B. V.-.-P. Ineichen, P. S., Good, N., Martin, R., Linnebank, M., Schwab, M. E.	2017	Nogo-A Antibodies for Progressive Multiple Sclerosis	CNS drugs
B. Wootla; A. Denic; A. E. Warrington; M. Rodriguez	2012	Need for a paradigm shift in therapeutic approaches to CNS injury	Expert Review of Neurotherapeutics
B.-.-A. Otsmane, J., Moumen, A., Raoul, C.	2014	Cerebrospinal fluid-targeted delivery of neutralizing anti-IFNgamma antibody delays motor decline in an ALS mouse model	Neuroreport
B.-.-L. Khosravi, K. D., Riemenschneider, H., Zhou, Q., Frottin, F., Mareljic, N., Czuppa, M., Farny, D., Hartmann, H., Michaelsen, M., Arzberger, T., Hartl, F. U., Hipp, M. S., Edbauer, D.	2020	Cell-to-cell transmission of C9orf72 poly-(Gly-Ala) triggers key features of ALS/FTD	The EMBO journal
B.-.-L. Li, X. Y., Li, Z., Bu, H., Sun, M. M., Guo, Y. S., Li, C. Y.	2008	Effect of ALS IgG on motor neurons in organotypic spinal cord cultures	The Canadian journal of neurological sciences
B.-.-M. Zhao, K., Gibbs, E., Yousefi, M., Napper, S., Cashman, N. R.	2019	Therapeutic vaccines for amyotrophic lateral sclerosis directed against disease specific epitopes of superoxide dismutase 1	Vaccine
B.-.-P. Ostermeyer-Shoaib, B. M.	1993	IgG subclass deficiency in amyotrophic lateral sclerosis	Acta neurologica Scandinavica
B.-.-V. Bady, C., Brudon, F., Lapras, J., Kopp, N., Trillet, M.	1988	[Peripheral neuropathies simulating amyotrophic lateral sclerosis in gammopathies]	Revue neurologique
B.-.-W. Jubelt, A. K., Ropka, S. L., Guidinger, P. L., McKinlay, M. A.	1989	Clearance of a persistent human enterovirus infection of the mouse central nervous system by the antiviral agent disoxaril	The Journal of infectious diseases
B.-.-W. Wootla, J. O., Warrington, A. E., Wittenberg, N. J., Denic, A., Xu, X., Jordan, L. R., Papke, L. M., Zoecklein, L. J., Pierce, M. L., Oh, S. H., Kantarci, O. H., Rodriguez, M.	2015	Naturally Occurring Monoclonal Antibodies and Their Therapeutic Potential for Neurologic Diseases	JAMA neurology
C. A. McIntyre; B. T. Flyg; T. C. Fong	2010	Fluorescence-activated cell sorting for CGMP processing of therapeutic cells
C. A. S. Dinarello, A.; Van Der Meer, J. W. M.	2012	Treating inflammation by blocking interleukin-1 in a broad spectrum of diseases	Nature Reviews Drug Discovery
C. A. v. d. M. Dinarello, J. W. M.	2013	Treating inflammation by blocking interleukin-1 in humans	Seminars in Immunology
C. A.-.-M. Boswell, E. E., Johnstone, B., Ulufatu, S., Schweiger, M. G., Bumbaca, D., Fielder, P. J., Prabhu, S., Khawli, L. A.	2013	Vascular physiology and protein disposition in a preclinical model of neurodegeneration	Molecular pharmaceutics
C. Alaez; M. Loyola; A. Murguía; H. Flores; A. Rodríguez; R. Ovilla; G. Ignacio; R. Amador; V. Salinas; F. Perez; D. Rodríguez; Z. Morales; G. Llinguin; A. Vazquez; A. Altamirano; C. Gorodezky	2006	Hematopoietic stem cell transplantation (HSCT): An approach to autoimmunity	Autoimmunity Reviews
C. Bailly	2019	Potential use of edaravone to reduce specific side effects of chemo-, radio- and immuno-therapy of cancers	International Immunopharmacology
C. Benkler; A. L. O'Neil; S. Slepian; F. Qian; P. H. Weinreb; L. L. Rubin	2018	Aggregated SOD1 causes selective death of cultured human motor neurons	Scientific Reports
C. Blizzard; E. Handley; R. Clark; T. Fielder; T. Dickson	2014	Synaptic alterations in the TDP-43A315T mouse model of amyotrophic lateral sclerosis	Amyotrophic Lateral Sclerosis and Frontotemporal Degeneration
C. Blizzard; K. Southam; A. King; T. Dickson	2012	Modelling site specific excitotoxicity: Revealing mechanisms of amyotrophic lateral sclerosis	Amyotrophic Lateral Sclerosis
C. Borrue-Fernandez; J. Mascias-Cadavid; M. Hernandez-Barral; M. A. Ortega-Casarrubios; G. Gutierrez-Gutierrez	2011	Botulinum toxin injections and sialorrhoea: A 24-month followup of a cohort of 26 patients	European Journal of Neurology
C. Brancia; P. Bongioanni; B. Noli; R. Pilleri; A. Boi; C. Cocco; M. Boido; R. Puddu; G. Borghero; G. L. Ferri	2015	TLQP peptides in amyotrophic lateral sclerosis (ALS): Animal model and human studies	Amyotrophic Lateral Sclerosis and Frontotemporal Degeneration
C. Dennys; M. Levy; M. C. Franco; C. Fernándezvalle; A. Estévez	2014	Discontinuous riluzole treatment may provide a better therapeutic alternative for ALS patients	Amyotrophic Lateral Sclerosis and Frontotemporal Degeneration
C. Fritz-French; W. Tyor	2012	Interferon-α (IFNα) neurotoxicity	Cytokine and Growth Factor Reviews
C. González-Fernández; P. Gonzalez; P. Andres-Benito; I. Ferrer; F. J. Rodríguez	2019	Wnt Signaling Alterations in the Human Spinal Cord of Amyotrophic Lateral Sclerosis Cases: Spotlight on Fz2 and Wnt5a	Molecular Neurobiology
C. H. Tator	2006	Review of treatment trials in humanspinal cord injury: Issues, difficulties, and recommendations	Neurosurgery
C. J. Wordell	1993	Recombinant human DNase for treatment of cystic fibrosis	Hospital Pharmacy
C. Junqueira Alves; A. Baldasserini Guimarães; J. Ruivo Maximino; S. Paulo Bydlowski; G. Chadi	2015	Purifi cation and characterization of mouse olfactory ensheathing cells and their potential use for therapy in amyotrophic lateral sclerosis (ALS)
C. Kleinschnitz; K. Reiners	2006	Multifocal motor neuropathy: Clinical features, pathophysiology and therapy	Klinische Neurophysiologie
C. L. Yuan; C. P. Tsai; L. B. Chang; K. P. Lin; D. J. Yen; K. P. Kao	1999	Serum anti-GM1 antibodies in Chinese patients with motor neuron disease and idiopathic peripheral neuropathy	Acta Neurologica Taiwanica
C. Leibiger; R. Braun	2015	Linking of autophagy and ubiquitin-proteasome system (UPS) in neurotoxic yeast cell death models	Neurodegenerative Diseases
C. Li; G. Chang; Y. Guo; Y. Jia; Y. Liu; X. Song	2010	Protective effect of combination of sulforaphane and riluzole on glutamate-mediated excitotoxicity	Amyotrophic Lateral Sclerosis
C. Lu; A. Petzold; J. Topping; K. Allen; M. Fish; R. Orrell; R. Howard; L. Greensmith; A. Malaspina	2013	Plasma neurofilaments as a biomarker of disease progression in ALS: Insights from longitudinal studies in mice and man	Amyotrophic Lateral Sclerosis and Frontotemporal Degeneration
C. M. Henstridge; M. Tzioras; R. C. Paolicelli	2019	Glial contribution to excitatory and inhibitory synapse loss in neurodegeneration	Frontiers in Cellular Neuroscience
C. M. Treleaven; T. J. Tamsett; J. A. Fidler; G. D. Hurbult; S. H. Cheng; L. S. Shihabuddin; J. C. Dodge	2011	The effect of pre-existing immunity to AAV on CNS directed gene therapy	Molecular Therapy
C. Miller; P. R. Sanberg; N. Kuzmin-Nichols; S. Garbuzova-Davis	2010	Reduction of activated microglia in the spinal cord of ALS mice with optimal dose of human umbilical cord blood cells	Cell Transplantation
C. Moglia; A. Calvo; M. Brunetti; A. Chiò; M. Grassano	2021	Broadening the clinical spectrum of FUS mutations: a case with monomelic amyotrophy with a late progression to amyotrophic lateral sclerosis	Neurological Sciences
C. Mueller; J. D. Berry; D. M. McKenna-Yasek; G. Gernoux; M. A. Owegi; L. M. Pothier; C. L. Douthwright; D. Gelevski; S. D. Luppino; M. Blackwood; N. S. Wightman; D. H. Oakley; M. P. Frosch; T. R. Flotte; M. E. Cudkowicz; R. H. Brown	2020	SOD1 suppression with adeno-associated virus and MicroRNA in familial ALS	New England Journal of Medicine
C. N. Dennys; J. Armstrong; M. Levy; Y. J. Byun; K. R. Ramdial; M. Bort; F. H. Rossi; C. Fernandez-Valle; M. C. Franco; A. G. Estevez	2015	Chronic inhibitory effect of riluzole on trophic factor production	Experimental Neurology
C. N. Fournier; D. Schoenfeld; J. D. Berry; M. E. Cudkowicz; J. Chan; C. Quinn; R. H. Brown; J. S. Salameh; M. G. Tansey; D. R. Beers; S. H. Appel; J. D. Glass	2018	An open label study of a novel immunosuppression intervention for the treatment of amyotrophic lateral sclerosis	Amyotroph Lateral Scler Frontotemporal Degener
C. Niemietz; S. Guttmann; V. Sauer; A. Zibert; H. Schmidt	2018	SERPINA1 as a therapeutic target in ATTR Amyloidosis	Zeitschrift fur Gastroenterologie
C. Nunes; M. Cordeiro; F. Silva; I. Santana; C. Moura; F. Alves	2010	The role of magnetic resonance perfusion imaging in the assessment of limbic encephalitis with neuronal potassium channel antibody. A case of rapidly progressive dementia	Neuroradiology Journal
C. P. Dohm; P. Kermer; M. Bähr	2008	Aggregopathy in neurodegenerative diseases: Mechanisms and therapeutic implication	Neurodegenerative Diseases
C. Perner; M. Fö Rster; F. H. Heidel; O. W. Witte; T. Prell; J. Grosskreutz	2017	Peripheral blood lymphocytes in ALS patients are defined by a distinct profile of deregulated chemokine receptors	Amyotrophic Lateral Sclerosis and Frontotemporal Degeneration
C. Sathyaprakash; M. A. Varela; N. Ababneh; M. J. A. Wood; R. Dafinca; K. Talbot	2016	Translating ribosome affinity purification from C9ORF72-ALS/FTD patient-derived IPS motor neurons	Amyotrophic Lateral Sclerosis and Frontotemporal Degeneration
C. Scheckel; A. Aguzzi	2018	Prions, prionoids and protein misfolding disorders	Nature Reviews Genetics
C. Spuch; C. Navarro	2010	Transport mechanisms at the blood-cerebrospinal-fluid barrier: Role of megalin (LRP2)	Recent Patents on Endocrine, Metabolic and Immune Drug Discovery
C. Spuch; O. Saida; C. Navarro	2012	Advances in the treatment of neurodegenerative disorders employing nanoparticles	Recent Patents on Drug Delivery and Formulation
C. Turnquist; I. Horikawa; E. Foran; E. O. Major; B. Vojtesek; D. P. Lane; X. Lu; B. T. Harris; C. C. Harris	2016	P53 isoforms regulate astrocyte-mediated neuroprotection and neurodegeneration	Cell Death and Differentiation
C. Volonté; S. Apolloni; M. T. Carrì; N. D'Ambrosi	2011	ALS: Focus on purinergic signalling	Pharmacology and Therapeutics
C. Zhang; C. P. Zhao; Y. H. Wang; Y. M. Xie; C. Zhou; W. Y. Li	2010	Effect of human mesenchymal stem cells intracardiac transplantation on SOD1-G93A mice	Amyotrophic Lateral Sclerosis
C. Zhang; C. Zhou; C. Zhao; R. Gu; Z. Liu	2009	Multiple administrations of human marrow stromal cells through cerebrospinal fluid may prolong survival of SOD1-G93A mice	Amyotrophic Lateral Sclerosis
C. Zhang; C. Zhou; J. J. Teng; R. L. Zhao; Y. Q. Song	2009	Multiple administrations of human marrow stromal cells through cerebrospinal fluid prolong survival in a transgenic mouse model of amyotrophic lateral sclerosis	Cytotherapy
C. Zona; M. Pieri; N. Canu; I. Carunchio; S. Caioli	2010	Involvement of the mTOR signaling in amyotrophic lateral sclerosis	Amyotrophic Lateral Sclerosis
C.-.-M. Grassi, M., Altobelli, D., Azzena, G. B., Preziosi, P.	1999	Characterization of Ca(2+)-channels responsible for K(+)-evoked [(3)H]noradrenaline release from rat brain cortex synaptosomes and their response to amyotrophic lateral sclerosis IgGs	Experimental neurology
C.-.-Z. Zhang, C., Teng, J. J., Zhao, R. L., Song, Y. Q., Zhang, C.	2009	Multiple administrations of human marrow stromal cells through cerebrospinal fluid prolong survival in a transgenic mouse model of amyotrophic lateral sclerosis	Cytotherapy
D. A. Amado; B. L. Davidson	2021	Gene Therapy for ALS: A Review	Mol Ther
D. A. Davis; P. A. Cox; S. A. Banack; M. J. Hagan; R. M. Palmour; W. G. Bradley; D. C. Mash	2018	BMAA, a cyanobacterial neurotoxin, triggers neurodegenerative changes in motor neurons and microglial activation in the spinal cord	Amyotrophic Lateral Sclerosis and Frontotemporal Degeneration
D. A. Hussar; T. L. Hussar	2017	Ocrelizumab, edaravone, and valbenazine	J Am Pharm Assoc (2003)
D. B. Agbo; F. Neff; F. Seitz; C. Binder; W. H. Oertel; M. Bacher; R. Dodel	2009	Immunization as treatment for Parkinson's disease
D. Bohl; S. Liu; S. Blanchard; M. Hocquemiller; G. Haase; J. M. Heard	2008	Directed evolution of motor neurons from genetically engineered neural precursors	Stem Cells
D. Fiore	2003	Autoimmunity: An ipothesis of its aetiopathogenesis. A need for verification	EOS Rivista di Immunologia ed Immunofarmacologia
D. Fiore	2001	Encephalo-medullopathies Bordetella Pertussis	Rivista di Neurobiologia
D. Fiore	2000	Immunologic factors in the pathogenesis of B. Pertussis	EOS Rivista di Immunologia ed Immunofarmacologia
D. Fiore	2007	Multiple sclerosis and Natalizumab	American journal of therapeutics
D. Fiore	2003	Diagnosis and treatment of multiple sclerosis and amyotrophic lateral sclerosis: neuropathies from Bordetella pertussis	American journal of therapeutics
D. Intiso	2012	Therapeutic Use of Botulinum Toxin in Neurorehabilitation	Journal of Toxicology
D. Ito; R. Taguchi; M. Deguchi; H. Ogasawara; E. Inoue	2020	Extensive splicing changes in an ALS/FTD transgenic mouse model overexpressing cytoplasmic fused in sarcoma	Scientific reports
D. J. Begley	2003	Understanding and circumventing the blood-brain barrier	Acta Paediatrica, International Journal of Paediatrics, Supplement
D. J. Eve; G. Steiner; A. Mahendrasah; C. Kurien; A. Thomson; D. Falco; P. R. Sanberg; C. V. Borlongan; S. Garbuzova-Davis	2017	Potential repair of the blood-spinal cord barrier coincides with reduction of microhemorrhages in the spinal cord of symptomatic als mice after intravenous human bone marrow CD34+ cell transplantation	Cell Transplantation
D. J. Lange	1994	AAEM minimonograph 41: Neuromuscular diseases associated with HIV-1 infection	Muscle and Nerve
D. J. Lange; W. Trojaborg	1994	Do GM1 antibodies induce demyelination?	Muscle and Nerve
D. J. Selkoe	2005	Defining molecular targets to prevent alzheimer disease	Archives of Neurology
D. J.-.-N. Lange, R., Voustianiouk, A., Seidel, G., Panchal, J., Wang, A. K.	2011	Do A-waves help predict intravenous immunoglobulin response in multifocal motor neuropathy without block?	Muscle & nerve
D. Jacob; A. Bogush; A. Parkar; P. Pasinelli; D. Trotti	2009	Motoneuron-specific changes in the expression of the drug efflux transporter P-glycoprotein throughout disease progression in a mouse model of amyotrophic lateral sclerosis: Implications for ALS therapy	Amyotrophic Lateral Sclerosis
D. Lacomis; A. El-Dokla	2012	What's in the literature?	Journal of Clinical Neuromuscular Disease
D. Lacomis; N. J. Silvestri; G. I. Wolfe	2014	What's in the literature?	Journal of Clinical Neuromuscular Disease
D. Lacomis; N. J. Silvestri; G. I. Wolfe; M. B. Bromberg	2015	What's in the Literature?	Journal of Clinical Neuromuscular Disease
D. Lambrechts; P. Carmeliet	2006	VEGF at the neurovascular interface: Therapeutic implications for motor neuron disease	Biochimica et Biophysica Acta - Molecular Basis of Disease
D. Patel; M. Hamarshi	2013	Acute on chronic respiratory failure in 79 year old male	Critical Care Medicine
D. Pilli; A. Zou; F. Tea; R. C. Dale; F. Brilot	2017	Expanding role of T cells in human autoimmune diseases of the central nervous system	Frontiers in Immunology
D. R. Staines	2008	Are multiple sclerosis and amyotrophic lateral sclerosis autoimmune disorders of endogenous vasoactive neuropeptides?	Medical hypotheses
D. Sproviero; S. La Salvia; F. Colombo; M. Giannini; L. Diamanti; P. Bini; O. Pansarasa; L. Porretti; C. Cereda	2016	Microvesicles in amyotrophic lateral sclerosis: Potential biomarkers for disease propagation and therapeutic targets	Journal of Extracellular Vesicles
D. Tewari; A. N. Sah; S. Bawari; S. F. Nabavi; A. R. Dehpour; S. Shirooie; N. Braidy; B. L. Fiebich; R. A. Vacca; S. M. Nabavi	2021	Role of nitric oxide in neurodegeneration: Function, regulation, and inhibition	Current Neuropharmacology
D. W. Y. Sah	2006	Therapeutic potential of RNA interference for neurological disorders	Life Sciences
D.-.-B. Khandelwal, M., Vivekanandan, S., Singh, S., Shukla, G., Goyal, V., Behari, M.	2006	IgM anti-GM1 antibody titers in patients with monomelic amyotrophy	Neurology India
D.-.-C. Lu, E. Y., Lee, P., Wang, Y. C., Ching, W., Markey, C., Gulstrom, C., Chen, L. C., Nguyen, T., Chin, W. C.	2015	Accelerated neuronal differentiation toward motor neuron lineage from human embryonic stem cell line (H9)	Tissue engineering. Part C, Methods
D.-.-M. Harrison, P., van Es, M. A., Stommel, E., Drory, V. E., Nefussy, B., van den Berg, L. H., Crayle, J., Bedlack, R.	2018	ALS reversals": demographics, disease characteristics, treatments, and co-morbidities"	Amyotrophic lateral sclerosis & frontotemporal degeneration
D.-.-M. Ottaviani, O., Arrigoni, G., Franchin, C., Vilardell, J., Sandre, M., Li, W., Parfitt, D. A., Pinna, L. A., Cheetham, M. E., Ruzzene, M.	2017	Protein kinase CK2 modulates HSJ1 function through phosphorylation of the UIM2 domain	Human molecular genetics
D.-.-R. Gonzalez, D. L., Correa, L. M., Court, F. A., Cerpa, W., Lipson, K. E., van Zundert, B., Brandan, E.	2018	The inhibition of CTGF/CCN2 activity improves muscle and locomotor function in a murine ALS model	Human molecular genetics
D.-.-W. Huang, J., Kidd, G., He, T. T., Cardona, A., Sasse, M. E., Stein, E. J., Kish, J., Tani, M., Charo, I. F., Proudfoot, A. E., Rollins, B. J., Handel, T., Ransohoff, R. M.	2005	Chronic expression of monocyte chemoattractant protein-1 in the central nervous system causes delayed encephalopathy and impaired microglial function in mice	FASEB journal
E. Bersano; E. Dalla Bella; M. Consonni; V. Pensato; C. Gellera; R. Lombardi; G. Lauria	2019	A case of neuropathy with antimyelinassociated glycoprotien antibodies and lower motor neuron disease	Journal of the Peripheral Nervous System
E. Check Hayden	2009	California stem-cell grants awarded	Nature
E. Conti; G. Sala; S. Diamanti; M. Casati; C. Lunetta; F. Gerardi; C. Tarlarini; L. Mosca; N. Riva; Y. Falzone; M. Filippi; I. Appollonio; C. Ferrarese; L. Tremolizzo	2021	Serum naturally occurring anti-TDP-43 auto-antibodies are increased in amyotrophic lateral sclerosis	Scientific Reports
E. Dalla Bella; P. Dacci; P. Penza; F. Andreetta; N. Levati; C. Ciano; G. Mora; P. Balbi; G. Lauria	2012	When you turn back to blink: Fosmn in the precarious balance between inflammation and degeneration	Journal of the Peripheral Nervous System
E. Delmont; S. Halstead; F. Galban-Horcajo; D. Yao; C. Desnuelle; H. Willison	2015	Improving the detection of IgM antibodies against glycolipids complexes of GM1 and galactocerebroside (GalC) in multifocal motor neuropathy using glyco-array and ELISA assays	Journal of the Peripheral Nervous System
E. F. Craparo; M. L. Bondì; G. Pitarresi; G. Cavallaro	2011	Nanoparticulate Systems for Drug Delivery and Targeting to the Central Nervous System	CNS Neuroscience and Therapeutics
E. F.-.-R. Salazar-Grueso, M. J., Martin, J., Dawson, G., Roos, R. P.	1990	Polyclonal IgM anti-GM1 ganglioside antibody in patients with motor neuron disease and variants	Annals of neurology
E. Feneberg; E. Gray; R. Fischer; D. Gordon; M. L. Thezenas; O. Ansorge; B. Kessler; K. Talbot; M. Turner	2017	TDP-43 based biomarker development in ALS	Amyotrophic Lateral Sclerosis and Frontotemporal Degeneration
E. G. Pokrishevsky, L.; Cashman, N.	2015	Misfolded wild-type SOD1 induced by pathological FUS or TDP-43 transmits intercellularly and is propagation-competent	Prion
E. G. Pokrishevsky, L.; Cashman, N.	2014	Misfolded wild-type SOD1 induced by pathological FUS or TDP-43 transmits intercellularly and is propagated misfolding-competent	American Journal of Neurodegenerative Diseases
E. J. Yang; M. Cai; S. M. Choi	2012	Electroacupuncture effect in the lung of an animal model of ALS	Clinical Neuropathology
E. J. Yang; S. H. Kim; S. Y. Jung; K. W. Lee; S. H. Lee; M. Cai; S. M. Choi	2014	Bee venom effects on UPS system in ALS model	Journal of Neurology
E. J.-.-J. Yang, J. H., Lee, S. M., Yang, S. C., Hwang, H. S., Lee, M. S., Choi, S. M.	2010	Bee venom attenuates neuroinflammatory events and extends survival in amyotrophic lateral sclerosis models	Journal of neuroinflammation
E. K. Lindqvist; L. R. Goldin; O. Landgren; C. Blimark; U. H. Mellqvist; I. Turesson; A. Wahlin; M. Björkholm; S. Y. Kristinsson	2011	Personal and family history of immune-related conditions increase the risk of plasma cell disorders: A population-based study	Blood
E. L.-.-H. Holzbaur, D. S., Weber, N., Wallace, K., She, Y., Kwak, S., Tchistiakova, L. A., Murphy, E., Hinson, J., Karim, R., Tan, X. Y., Kelley, P., McGill, K. C., Williams, G., Hobbs, C., Doherty, P., Zaleska, M. M., Pangalos, M. N., Walsh, F. S.	2006	Myostatin inhibition slows muscle atrophy in rodent models of amyotrophic lateral sclerosis	Neurobiology of disease
E. M. Donnelly; N. M. Boulis	2012	Update on gene and stem cell therapy approaches for spinal muscular atrophy	Expert Opinion on Biological Therapy
E. Malta	1995	The biopharmaceutical industry and new drugs for amyotrophic lateral sclerosis	Adv Neurol
E. Nobile-Orazio; C. Giannotta; L. Mauri; M. G. Ciampa; F. Gallia; F. Terenghi; M. Bianco; S. Sonnino	2016	IGM antibodies to GM1(NEUGC) and GD1B(NEUGC) in multifocal motor neuropathy and chronic inflammatory demyelinating polyradiculoneuropathy	Journal of the Peripheral Nervous System
E. Nobile-Orazio; M. Carpo; G. Scarlato	1994	Gangliosides: Their role in clinical neurology	Drugs
E. Patten	1986	Therapeutic plasmapheresis and plasma exchange	Critical reviews in clinical laboratory sciences
E. Pokrishevsky; L. I. Grad; M. Yousefi; J. Wang; I. R. Mackenzie; N. R. Cashman	2012	Aberrant Localization of FUS and TDP43 Is Associated with Misfolding of SOD1 in Amyotrophic Lateral Sclerosis	Plos One
E. Pokrishevsky; R. H. Hong; J. Nan; N. Cashman	2017	Initiation, propagation and inhibition of SOD1 misfolding in amyotrophic lateral sclerosis	Amyotrophic Lateral Sclerosis and Frontotemporal Degeneration
E. Pollari; K. Kanninen; R. Giniatullina; T. Ahtoniemi; T. Malm; R. Giniatullin; J. Koistinaho; J. Magga	2010	Granulocyte colony stimulating factor reduces inflammation in a mouse model of ALS	Amyotrophic Lateral Sclerosis
E. Robinson; Z. Wong; S. Nelson; B. Kokona; R. Fairman	2018	HSP104 can dissagregate inclusion bodies in drosophila melanogaster, formed by the polyga dipeptide repeat mutant protein form of C9 or F72, a protein known to be involved amyotrophic lateral sclerosis	Protein Science
E. Tan; J. Lynn; A. A. Amato; J. T. Kissel; K. W. Rammohan; Z. Sahenk; J. R. Warmolts; C. E. Jackson; R. J. Barohn; J. R. Mendell	1994	IMMUNOSUPPRESSIVE TREATMENT OF MOTOR-NEURON SYNDROMES - ATTEMPTS TO DISTINGUISH A TREATABLE DISORDER	Archives of Neurology
E. Tokuda; S. I. Ono	2009	Overexpression of glial metallothionein slows disease progression in a mouse model of mutant SOD1-linked familial ALS	Amyotrophic Lateral Sclerosis
E. Valera; E. Masliah	2013	Immunotherapy for neurodegenerative diseases: Focus on α- synucleinopathies	Pharmacology and Therapeutics
E.-.-B. Rewald, E.	1994	Intrathecal IgG for ALS	Neurology
E.-.-H. Pokrishevsky, R. H., Mackenzie, I. R., Cashman, N. R.	2017	Spinal cord homogenates from SOD1 familial amyotrophic lateral sclerosis induce SOD1 aggregation in living cells	PloS one
E.-.-L. Tan, D. J., Amato, A. A., Kissel, J. T., Rammohan, K. W., Sahenk, Z., Warmolts, J. R., Jackson, C. E., Barohn, R. J., Mendell, J. R.	1994	Immunosuppressive treatment of motor neuron syndromes. Attempts to distinguish a treatable disorder	Archives of neurology
F. B. Patin, T.; Vourc'h, P.; Nadal-Desbarats, L.; Gossens, J. F.; Marouillat, S.; Dessein, A. F.; Descat, A.; Madji Hounoum, B.; Bruno, C.; Watier, H.; Si-Tahar, M.; Leman, S.; Lecron, J. C.; Andres, C.; Corcia, P.; Blasco, H.	2016	Interleukin-6 blockade improves inflammatory but not metabolic condition in ALS	Amyotrophic Lateral Sclerosis and Frontotemporal Degeneration
F. Brahimi; M. Maira; P. F. Barcelona; A. Galan; T. Aboulkassim; K. Teske; M. L. Rogers; L. Bertram; J. Wang; M. Yousefi; R. Rush; M. Fabian; N. Cashman; H. U. Saragovi	2016	The Paradoxical Signals of Two TrkC Receptor Isoforms Supports a Rationale for Novel Therapeutic Strategies in ALS	PLoS One
F. C. Barone; K. S. Kilgore	2006	Role of inflammation and cellular stress in brain injury and central nervous system diseases	Clinical Neuroscience Research
F. C. Patin, P.; Baranek, T.; Vourc'h, P.; Madji Hounoum, B.; Lecron, J. C.; Leman, S.; Gouilleux, F.; Nadal-Desbarats, L.; Goossens, J. F.; Andres, C. R.; Blasco, H.	2015	Metabolic and immunologic effects of anti-interleukin-6 receptor antibody (MR16-1) in SOD1(G93A) mouse model of amyotrophic lateral sclerosis	Amyotrophic Lateral Sclerosis and Frontotemporal Degeneration
F. Fecto; Y. T. Esengul; H. X. Deng; T. Siddique	2012	Failure of autolysosome formation results in impaired autophagy in ubqln2-linked ALS-FTD	Amyotrophic Lateral Sclerosis
F. Ferrantelli; C. Chiozzini; P. Leone; F. Manfredi; M. Federico	2020	Engineered extracellular vesicles/exosomes as a new tool against neurodegenerative diseases	Pharmaceutics
F. G. Gros-Louis, G.; Julien, J. P.	2009	Development of immunization approaches to amyotrophic lateral sclerosis	Future Neurology
F. Hefti	1994	Neurotrophic factor therapy for nervous system degenerative diseases	Journal of Neurobiology
F. Hervé; N. Ghinea; J. M. Scherrmann	2008	CNS delivery via adsorptive transcytosis	AAPS Journal
F. J. Murphy; K. E. Keating; D. Sheehan; I. Hayes	2005	Immunological approaches to prevent neuronal apoptosis during neuroinflammation	Current Medicinal Chemistry: Anti-Inflammatory and Anti-Allergy Agents
F. J.-.-N. Steyn, S. T., Lee, J. D., Leong, J. W., Buckley, A. J., Veldhuis, J. D., McCombe, P. A., Chen, C., Bellingham, M. C.	2012	Impairments to the GH-IGF-I axis in hSOD1G93A mice give insight into possible mechanisms of GH dysregulation in patients with amyotrophic lateral sclerosis	Endocrinology
F. L. Evans; M. Dittmer; A. G. de la Fuente; D. C. Fitzgerald	2019	Protective and Regenerative Roles of T Cells in Central Nervous System Disorders	Frontiers in Immunology
F. L. Panza, M.; Seripa, D.; Daniele, A.; Watling, M.; Giannelli, G.; Imbimbo, B. P.	2020	Development of disease-modifying drugs for frontotemporal dementia spectrum disorders	Nat Rev Neurol
F. Lake	2020	Profiling a human: The role of antibodies	BioTechniques
F. M. Longo; S. M. Massa	2008	Small molecule modulation of p75 neurotrophin receptor functions	CNS and Neurological Disorders - Drug Targets
F. Malerba; F. Paoletti; S. Capsoni; A. Cattaneo	2011	Intranasal delivery of therapeutic proteins for neurological diseases	Expert Opinion on Drug Delivery
F. Maulucci; D. Benninger; J. F. Démonet; R. A. Du Pasquier; L. Hirt; A. Hottinger; T. Kuntzer; P. Michel; B. Nater; J. Novy; A. O. Rossetti; M. Schluep; F. J. G. Vingerhoets	2017	[Neurology]	Rev Med Suisse
F. Pastorelli; N. Fini; F. Salvi; R. Plasmati	2009	Motor neuron disease responsive to IVIG treatment: The diagnostic gray line between ALS and MMN. A neurophysiologic study	Journal of the Peripheral Nervous System
F. Puentes; O. Yildiz; C. Lu; J. Wuu; M. Benatar; A. Malaspina	2018	Autoantibodies against axonal proteins as biomarkers and therapeutic targets in amyotrophic lateral sclerosis	Amyotrophic Lateral Sclerosis and Frontotemporal Degeneration
F. Re; M. Gregori; M. Masserini	2012	Nanotechnology for neurodegenerative disorders	Nanomedicine: Nanotechnology, Biology, and Medicine
F. S. R. Walsh, J. L.	2012	Myostatin as a therapeutic target in Amyotrophic Lateral Sclerosis	Neurochemistry International
F. S. Walsh; A. J. Celeste	2005	Myostatin: A modulator of skeletal-muscle stem cells	Biochemical Society Transactions
F. Somma; R. Castagnola; D. Bollino; L. Marigo	2010	Oral inflammatory process and general health Part 1: The focal infection and the oral inflammatory lesion	European Review for Medical and Pharmacological Sciences
F.-.-A. Terenghi, S., Nobile-Orazio, E.	2006	Circulating levels of cytokines and their modulation by intravenous immunoglobulin in multifocal motor neuropathy	Journal of the peripheral nervous system : JPNS
F.-.-G. Cifuentes, C. E., Fiordelisio, T., Guerrero, G., Lai, F. A., Hernandez-Cruz, A.	2001	A ryanodine fluorescent derivative reveals the presence of high-affinity ryanodine binding sites in the Golgi complex of rat sympathetic neurons, with possible functional roles in intracellular Ca(2+) signaling	Cellular signalling
F.-.-H. Romi, G., Gilhus, N. E.	2011	Heat-shock proteins in clinical neurology	European neurology
F.-.-S. Gros-Louis, G., Lariviere, R., Julien, J. P.	2010	Intracerebroventricular infusion of monoclonal antibody or its derived Fab fragment against misfolded forms of SOD1 mutant delays mortality in a mouse model of ALS	Journal of neurochemistry
F.-.-T. Puentes, J., Kuhle, J., van der Star, B. J., Douiri, A., Giovannoni, G., Baker, D., Amor, S., Malaspina, A.	2014	Immune reactivity to neurofilament proteins in the clinical staging of amyotrophic lateral sclerosis	Journal of neurology, neurosurgery, and psychiatry
G. D.-.-K. Ghadge, B. K., Drigotas, C., Roos, R. P.	2019	Single chain variable fragment antibodies directed against SOD1 ameliorate disease in mutant SOD1 transgenic mice	Neurobiology of disease
G. D.-.-P. Ghadge, J. D., Koduvayur, S. P., Kay, B. K., Roos, R. P.	2013	Single chain variable fragment antibodies block aggregation and toxicity induced by familial ALS-linked mutant forms of SOD1	Neurobiology of disease
G. E. Solorzano; L. H. Phillips	2011	Inclusion Body Myositis: Diagnosis, Pathogenesis, and Treatment Options	Rheumatic Disease Clinics of North America
G. Gargiulo-Monachelli; M. Meyer; A. Lara; L. Garay; A. Lima; P. Roig; A. F. De Nicola; M. C. Gonzalez Deniselle	2019	Comparative effects of progesterone and the synthetic progestin norethindrone on neuroprotection in a model of spontaneous motoneuron degeneration	Journal of Steroid Biochemistry and Molecular Biology
G. Gernoux; F. Borel; G. Gao; R. Brown; C. Mueller	2015	Detection and characterization of immune response against AAVrh10 vector after intrathecal vector delivery in non-human primates	Molecular Therapy
G. J. Parry	1996	AAEM case report 30: Multifocal motor neuropathy	Muscle and Nerve
G. Kreiner	2018	What have we learned recently from transgenic mouse models about neurodegeneration? The most promising discoveries of this millennium	Pharmacological Reports
G. Kroemer	2015	Autophagy: A druggable process that is deregulated in aging and human disease	Journal of Clinical Investigation
G. Lauria; A. Campanella; G. Filippini; A. Martini; P. Penza; L. Maggi; C. Antozzi; C. Ciano; P. Beretta; D. Caldiroli; F. Ghelma; G. Ferrara; P. Ghezzi; R. Mantegazza	2009	Erythropoietin in amyotrophic lateral sclerosis: A pilot, randomized, double-blind, placebo-controlled study of safety and tolerability	Amyotrophic Lateral Sclerosis
G. S. Burrill	1998	U.S. Biotech Industry still looking for rally following second quarter 1998	Journal of Biolaw and Business
G. Santoni; C. Cardinali; M. B. Morelli; M. Santoni; M. Nabissi; C. Amantini	2015	Danger- and pathogen-associated molecular patterns recognition by pattern-recognition receptors and ion channels of the transient receptor potential family triggers the inflammasome activation in immune cells and sensory neurons	Journal of Neuroinflammation
G. Scarlato; E. Nobile-Orazio	1991	Motoneuron-disease-like disorder after ganglioside therapy	Lancet
G. Serratrice	1993	Motor neuropathies and antiglycolipid antibodies	Clin Exp Neurol
G. Serratrice	1993	Motor neuropathies and antiglycolipid antibodies	Clinical and experimental neurology
G. T. Piccirillo, F.; Monsurrò, M. R.; Habetswallner, F.; De Martino, B. M.; Tedeschi, G.	2016	Intravenous immunoglobulins efficacy in a case of ALS with myasthenic symptoms	European Journal of Neurology
G. T. Serratrice; T. L. Munsat	1995	Overview of the pathogenesis and therapy of amyotrophic lateral sclerosis	Adv Neurol
G.-.-D. Gegelashvili, Y., Danbolt, N. C., Schousboe, A.	2000	The high-affinity glutamate transporters GLT1, GLAST, and EAAT4 are regulated via different signalling mechanisms	Neurochemistry international
G.-.-L. Huang, X., Bian, Y., Shao, Z., Sheng, G., Pepinsky, R. B., Mi, S.	2013	Death receptor 6 (DR6) antagonist antibody is neuroprotective in the mouse SOD1G93A model of amyotrophic lateral sclerosis	Cell death & disease
G.-.-R. Battaglia, B., Bucci, D., Di Menna, L., Molinaro, G., Pallottino, S., Nicoletti, F., Bruno, V.	2015	Activation of mGlu3 metabotropic glutamate receptors enhances GDNF and GLT-1 formation in the spinal cord and rescues motor neurons in the SOD-1 mouse model of amyotrophic lateral sclerosis	Neurobiology of disease
H. Abraham; J. Kuzhively; S. W. Rizvi	2017	Chronic inflammatory demyelinating polyneuropathy (CIDP): An uncommon manifestation of systemic lupus erythematosus (SLE)	American Journal of Case Reports
H. Akiyama; Z. Kobayashi; T. Arai; M. Hosokawa; K. Tsuchiya; O. Yokota; Y. Shimomura; H. Kondo; C. Haga; M. Hasegawa	2010	Screening for FUS proteinopathy in the institutional brain collection	Dementia and Geriatric Cognitive Disorders
H. Amital	2002	Third Interdisciplinary Symposium on the Treatment of Autoimmune Disorders, 8-10 June 2002, Leipzig, Germany	Israel Medical Association Journal
H. E. Salapa; N. A. McLean; M. C. Levin	2018	Autoimmunity to the rna binding protein hnrnp a1 contributes to neurodegeneration in MS	Multiple Sclerosis Journal
H. H. Zhang; T. Wang; Z. F. Han; G. Y. Liu	2020	Mendelian randomization study to evaluate the effects of interleukin-6 signaling on four neurodegenerative diseases	Neurological Sciences
H. Hattori; E. Nagata; T. Ishihara; K. Jinnouchi; Y. Ogawa; T. Nagai; S. Suzuki; T. Shimizu; J. Hamada; N. Suzuki	2007	Inflammatory myopathy with anti-golgi antibody and anti-SS-A/Ro antibody	Internal Medicine
H. J. Kadhim; J. Duchateau; G. Sébire	2008	Cytokines and brain injury: Invited review	Journal of Intensive Care Medicine
H. K. Shapiro	1998	Carbonyl-trapping therapeutic strategies	American Journal of Therapeutics
H. N.-.-S. Liu, T., Horne, P., Pioro, E. P., Strong, M. J., Rogaeva, E., Bilbao, J., Zinman, L., Robertson, J.	2009	Lack of evidence of monomer/misfolded superoxide dismutase-1 in sporadic amyotrophic lateral sclerosis	Annals of neurology
H. N.-.-T. Liu, S., Dasilva, K., Taylor, D., Zhao, B., Rakhit, R., Brown, M., Chakrabartty, A., McLaurin, J., Robertson, J.	2012	Targeting of monomer/misfolded SOD1 as a therapeutic strategy for amyotrophic lateral sclerosis	The Journal of neuroscience
H. Q. Han; X. Zhou; W. E. Mitch; A. L. Goldberg	2013	Myostatin/activin pathway antagonism: Molecular basis and therapeutic potential	International Journal of Biochemistry and Cell Biology
H. R. Broom; J. A. O. Rumfeldt; E. M. Meiering	2014	Many roads lead to Rome? Multiple modes of Cu,Zn superoxide dismutase destabilization, misfolding and aggregation in amyotrophic lateral sclerosis	Amyloids in Health and Disease
H. R. Martínez; E. Caro; A. Gil-Valadez; J. Moreno Cuevas; G. M. T. González; J. F. Molina-López; S. A. Treviño-Manllo; M. Hernández-Torre	2010	Amyotrophic lateral sclerosis and neurocysticercosis	Revista Mexicana de Neurociencia
H. S. Sharma	2007	Neurotrophic factors in combination: A possible new therapeutic strategy to influence pathophysiology of spinal cord injury and repair mechanisms	Current Pharmaceutical Design
H. Shahheydari; K. Y. Soo; M. Halloran; V. Sundaramoorthy; S. Parakh; K. A. Southam; C. A. McLean; M. A. Farg; J. D. Atkin	2016	Rab1 reverses both autophagy dysfunction and ER-Golgi trafficking defects in ALS	Amyotrophic Lateral Sclerosis and Frontotemporal Degeneration
H. T. Gotaas; G. O. Skeie; N. E. Gilhus	2016	Myasthenia gravis and amyotrophic lateral sclerosis: A pathogenic overlap	Neuromuscular Disorders
H. Tseng; E. Sun; J. Powers; C. Chen	2019	Loss of optineurin disrupts mitochondrial networks and morphology	Investigative Ophthalmology and Visual Science
H. Vincent; T. McNeal	2011	Double trouble: A case of myasthenia gravis and amyotrophic lateral sclerosis	Journal of Investigative Medicine
H. Warita; H. Mizuno; N. Suzuki; Y. Itoyama; M. Aoki	2011	Progressive accumulation of nerve/glial antigen 2 proteoglycan in the spinal cord with mutant SOD1-induced neurodegeneration in rats	Amyotrophic Lateral Sclerosis
H. Warita; T. Shijo; K. Ikeda; H. Ono; T. Akiyama; S. Mitsuzawa; A. Nishiyama; R. Izumi; N. Suzuki; M. Aoki	2016	Involvement of endogenous neural precursors in spinal cord of a rat model of ALS	Clinical Neurology
H. X. Deng; E. H. Bigio; G. Gorrie; H. Zhai; J. Yan; F. Fecto; K. Ajroud; M. I. Mishra; Q. Mao; N. Siddique; E. Mugnaini; F. Tatiana; R. Vassar; B. Ghetti; T. Siddique	2012	Ubiquilin2-immunoreactive inclusions represent a convergent pathology in a wide spectrum of neurodegenerative diseases	Amyotrophic Lateral Sclerosis
H. Zhang	2011	Anti-IL-1 β therapies	Recent Patents on DNA and Gene Sequences
H. Zhuo; L. Zhou	2016	Gpnmb/osteoactivin: An indicator and therapeutic target in tumor and nontumorous lesions	Pharmazie
H.-.-H. Wootz, I., Korhonen, L., Napankangas, U., Lindholm, D.	2004	Caspase-12 cleavage and increased oxidative stress during motoneuron degeneration in transgenic mouse model of ALS	Biochemical and biophysical research communications
H.-.-K. Takeuchi, Y., Yoshihara, T., Niwa, J., Doyu, M., Ohtsuka, K., Sobue, G.	2002	Hsp70 and Hsp40 improve neurite outgrowth and suppress intracytoplasmic aggregate formation in cultured neuronal cells expressing mutant SOD1	Brain research
H.-.-N. Takahashi, Y. I., Makita, N., Kushimura-Okada, Y., Ishii, R., Tanaka, A., Ohara, T., Nakane, S., Higuchi, O., Nakagawa, M., Mizuno, T.	2016	Myasthenic symptoms in anti-low-density lipoprotein receptor-related protein 4 antibody-seropositive amyotrophic lateral sclerosis: two case reports	BMC neurology
H.-.-N. Tsuji, T., Yamashita, M., Masuda-Suzukake, M., Kametani, F., Akiyama, H., Mann, D. M., Tamaoka, A., Hasegawa, M.	2012	Epitope mapping of antibodies against TDP-43 and detection of protease-resistant fragments of pathological TDP-43 in amyotrophic lateral sclerosis and frontotemporal lobar degeneration	Biochemical and biophysical research communications
I. A. Zavalishin; N. P. Bochkov; Z. A. Suslina; M. N. Zakharova; V. Z. Tarantul; B. S. Naroditskiy; N. A. Suponeva; S. N. Illarioshkin; M. M. Shmarov; D. Y. Logunov; I. L. Tutyhina; L. V. Verkhovskaya; E. S. Sedova; A. V. Vasiliev; L. V. Brylev; A. L. Ginzburg	2008	Gene Therapy of Amyotrophic Lateral Sclerosis	Bulletin of Experimental Biology and Medicine
I. Cortese; D. R. Cornblath	2013	Therapeutic plasma exchange in neurology: 2012	Journal of Clinical Apheresis
I. de Hemptinne; C. Boucherie; R. Pochet; K. Bantubungi; S. N. Schiffmann; J. M. Maloteaux; E. Hermans	2006	Unilateral induction of progenitors in the spinal cord of hSOD1G93A transgenic rats correlates with an asymmetrical hind limb paralysis	Neuroscience Letters
I. Eleftheriadou; A. Trabalza; S. M. Ellison; N. D. Mazarakis	2013	Gene transfer to motor neurons with novel targeted lentiviral vectors	Molecular Therapy
I. Kacem; C. Gnaichia; Y. Hizem; L. Sellami; M. Ben Djebara; A. Gargouri-Berrechid; R. Gouider	2013	Paraneoplastic motor neuron disease	Journal of the Neurological Sciences
I. Miyazaki	2017	Astrocyte-targeted therapeutic strategies for neurological disorders	Current Pharmaceutical Design
I. Rojas-Marcos; A. Rousseau; F. Keime-Guibert; R. Rene; S. Cartalat-Carel; J. Y. Delattre; F. Graus	2003	Spectrum of paraneoplastic neurologic disorders in women with breast and gynecologic cancer	Medicine
I.-.-B. Benga, O.	2012	Implications of water channel proteins in selected neurological disorders: epilepsies, muscular dystrophies, amyotrophic lateral sclerosis, neuromyelitis optica, Parkinson's disease, and spongiform encephalopathies	Molecular aspects of medicine
I.-.-N. Obal, B., Meszlenyi, V., Patai, R., Ricken, G., Kovacs, G. G., Tripolszki, K., Szell, M., Siklos, L., Engelhardt, J. I.	2019	Experimental Motor Neuron Disease Induced in Mice with Long-Term Repeated Intraperitoneal Injections of Serum from ALS Patients	International journal of molecular sciences
J. A. Varley; S. R. Irani	2016	Antibody-associated autoimmune neurological disease	Medicine (United Kingdom)
J. Aird	2003	Cell & Gene Therapies - SMi Conference: 24-25 September 2003, London, UK	IDrugs
J. B. Delaye; D. Lanznaster; C. Veyrat-Durebex; A. Fontaine; G. Bacle; A. Lefevre; R. Hergesheimer; J. C. Lecron; P. Vourc'h; C. R. Andres; F. Maillot; P. Corcia; P. Emond; H. Blasco	2020	Behavioral, Hormonal, Inflammatory, and Metabolic Effects Associated with FGF21-Pathway Activation in an ALS Mouse Model	Neurotherapeutics
J. B. Grimm, T.; Weinreb, P.; Maier, M.; Dunstan, R.; Qian, F.; Arastu, M.; Chollate, S.; Brennan, M.; Quintero-Monzon, O.; Scannevin, R.; Arnold, H.; Engber, T.; Rhodes, K.; Hock, C.; Sandrock, A.; Nitsch, R.	2016	Human-derived monoclonal antibodiesforalzheimer's disease and related proteinopathies	Neurobiology of Aging
J. B. Leverenz; T. J. Montine; E. J. Steinbart; T. D. Bird	2009	TDP-43 deposition in presenilin utation-associated Alzheimer's, sporadic Alzheimer's, and non-demented lderly	Alzheimer's and Dementia
J. Beekman; A. Keisler; O. Pedraza; M. Haramura; A. Gianella-Borradori; E. Katz; J. N. Ratchford; G. Barron; L. J. Cook; J. M. Behne; T. F. Blaschke; T. J. Smith; M. R. Yeaman	2019	Neuromyelitis optica spectrum disorder: Patient experience and quality of life	Neurology: Neuroimmunology and NeuroInflammation
J. Braun; X. Baraliakos	2009	Treatment of ankylosing spondylitis and other spondyloarthritides	Current Opinion in Rheumatology
J. C. Polanco; C. Li; L. G. Bodea; R. Martinez-Marmol; F. A. Meunier; J. Götz	2018	Amyloid-β and tau complexity - Towards improved biomarkers and targeted therapies	Nature Reviews Neurology
J. Chery	2016	RNA therapeutics: RNAi and antisense mechanisms and clinical applications	Postdoc J
J. D. Rohrer; A. L. Boxer	2021	The Frontotemporal Dementia Prevention Initiative: Linking Together Genetic Frontotemporal Dementia Cohort Studies
J. D.-.-B. Talbot, J. N., Nonner, D., Zhang, Z., Wicomb, K., Barrett, E. F.	2016	Preservation of neuromuscular function in symptomatic SOD1-G93A mice by peripheral infusion of methylene blue	Experimental neurology
J. D.-.-L. Lee, N., Levin, S. C., Ottosson, L., Andersson, U., Harris, H. E., Woodruff, T. M.	2019	Therapeutic blockade of HMGB1 reduces early motor deficits, but not survival in the SOD1(G93A) mouse model of amyotrophic lateral sclerosis	Journal of neuroinflammation
J. De Seze; S. Delalande; P. Vermersch	2005	Neurological manifestations in Sjögren syndrome	Revue de Medecine Interne
J. Gallard; J. Franques; A. Verschueren; S. L. Gervais; J. Boucraut; J. Honnorat; S. Attarian; J. Pouget	2012	Acute lower motor neurone paraneoplastic disease associated with neuronal autoantibodies: Report of two cases	Journal of the Peripheral Nervous System
J. Gamez; C. Cervera; A. Codina	2000	New hope for patients with pure lower motor neuron syndromes	Journal of Neurology Neurosurgery and Psychiatry
J. Goodfellow; G. Gorrie; V. Leach; S. Patel; G. Mackay	2019	Cancer and motor neuron disease-causal or coincidental? Two contrasting cases	Neurol Sci
J. H. Grimm, C.; Nitsch, R. M.	2017	Development of human antibodies for the treatment of protein aggregation diseases	Journal of Translational Medicine
J. H. Jiang; E. J. Yang; M. G. Baek; S. H. Kim; S. M. Lee; S. M. Choi	2011	Anti-Inflammatory Effects of Electroacupuncture in the Respiratory System of a Symptomatic Amyotrophic Lateral Sclerosis Animal Model	Neurodegenerative Diseases
J. H.-.-Y. Kordower, Chu, Maclennan, A. J.	1997	Ciliary neurotrophic factor receptor alpha-immunoreactivity in the monkey central nervous system	The Journal of comparative neurology
J. I.-.-S. Engelhardt, L., Appel, S. H.	1997	Altered calcium homeostasis and ultrastructure in motoneurons of mice caused by passively transferred anti-motoneuronal IgG	Journal of neuropathology and experimental neurology
J. J. Chen	2020	Overview of Current and Emerging Therapies for Amyotrophic Lateral Sclerosis	American Journal of Managed Care
J. J. Kelly	2008	Neuromuscular diseases	Rev Neurol Dis
J. J. Kelly	2009	Best of the 2009 annual meeting of the american academy of neurology	Reviews in neurological diseases
J. J. M. Hoozemans; S. M. Chafekar; F. Baas; P. Eikelenboom; W. Scheper	2006	Always around, never the same: Pathways of amyloid beta induced neurodegeneration throughout the pathogenic cascade of Alzheimer's disease	Current Medicinal Chemistry
J. J.-.-D.-J. Graber, S.	2009	Protective autoimmunity in the nervous system	Pharmacology & therapeutics
J. J.-.-K. Halperin, G. P., Brazinsky, S., Tsai, T. F., Cheng, T., Ironside, A., Wu, P., Delfiner, J., Golightly, M., Brown, R. H., et al.,	1990	Immunologic reactivity against Borrelia burgdorferi in patients with motor neuron disease	Archives of neurology
J. Konvalinka; P. Sacha; V. Navrátil; C. Barinka; J. Tykvart	2011	Glutamate carboxypeptidase ii and metabolism of N-acetyl-aspartyl-glutamate	GLIA
J. L. Fox	1997	Biotech unruffled by setbacks	Nature Biotechnology
J. Lowe; N. Hand; R. J. Mayer	2005	Application of ubiquitin immunohistochemistry to the diagnosis of disease	Methods Enzymol
J. M. Cedarbaum; C. Chapman; M. Charatan; N. Stambler; L. Andrews; C. Zhan; S. Radka; D. Morrisey; D. Lakings; B. R. Brooks; M. Sanjak; A. Pestronk; J. Florence; H. Mitsumoto; K. Szirony; L. Bittle; S. Ringel; H. Neville; J. Brinkmann; J. Wittes	1995	A phase I study of recombinant human ciliary neurotrophic factor (rHCNTF) in patients with amyotrophic lateral sclerosis	Clinical Neuropharmacology
J. M. Lee; G. J. Guillemin; R. S. Chung	2012	Development of an in vitro model of human motor neurons from human foetal spinal cord in amyotrophic lateral sclerosis	Amyotrophic Lateral Sclerosis
J. M. Martinez-Thompson; M. R. Snyder; M. Ettore; A. McKeon; S. J. Pittock; M. M. Roforth; J. Mandrekar; M. L. Mauermann; B. V. Taylor; P. J. B. Dyck; A. J. Windebank; C. J. Klein	2018	Composite ganglioside autoantibodies and immune treatment response in MMN and MADSAM	Muscle and Nerve
J. M. Martinez-Thompson; M. R. Snyder; M. W. Ettore; A. McKeon; S. J. Pittock; C. J. Klein	2015	Ganglioside composite autoantibody testing aids in identification of immunotherapy-responsive multifocal motor neuropathy (MMN)	Annals of Neurology
J. M. Massey	1997	Acquired myasthenia gravis	Neurologic Clinics
J. M. Schwab; K. Brechtel; C. A. Mueller; V. Failli; H. P. Kaps; S. K. Tuli; H. J. Schluesener	2006	Experimental strategies to promote spinal cord regeneration - An integrative perspective	Progress in Neurobiology
J. M.-.-K. Wilson, I., Pow, D. V., Craig, U. K., Shaw, C. A.	2003	Decrease in glial glutamate transporter variants and excitatory amino acid receptor down-regulation in a murine model of ALS-PDC	Neuromolecular medicine
J. M.-.-V. Lincecum, F. G., Wang, M. Z., Thompson, K., De Zutter, G. S., Kidd, J., Moreno, A., Sanchez, R., Carrion, I. J., Levine, B. A., Al-Nakhala, B. M., Sullivan, S. M., Gill, A., Perrin, S.	2010	From transcriptome analysis to therapeutic anti-CD40L treatment in the SOD1 model of amyotrophic lateral sclerosis	Nature genetics
J. Massey	2020	Rapidly reversible tongue atrophy in seronegative myasthenia gravis following treatment	Muscle and Nerve
J. Massey; E. W. Massey	2020	Reversible tongue atrophy in seronegative myasthenia gravis following treatment	Neurology
J. O.-.-K. Watzlawik, R. J., Wootla, B., Painter, M. M., Warrington, A. E., Carey, W. A., Rodriguez, M.	2016	Antibody Binding Specificity for Kappa (Vkappa) Light Chain-containing Human (IgM) Antibodies: Polysialic Acid (PSA) Attached to NCAM as a Case Study	Journal of visualized experiments : JoVE
J. P. A. Franklin, M.; Shaw, P. J.	2020	SOD1-targeting therapies for neurodegenerative diseases: a review of current findings and future potential	Expert Opinion on Orphan Drugs
J. P. Mohr	2004	Stroke	Amyotrophic Lateral Sclerosis and Other Motor Neuron Disorders
J. P. P. Julien, P.; Kriz, J.; Gravel, C.	2012	Immunotherapy in amyotrophic lateral sclerosis	European Neuropsychopharmacology
J. P. P. Julien, S.; Gravel, C.	2015	Single chain recombinant antibodies to target TDP-43 interactions	Journal of Neurochemistry
J. P. Wise; J. Cannon	2016	Alterations in optineurin expression and localization in pre-clinical Parkinson's disease models	Toxicological Sciences
J. R. Bhatt; R. M. Pascuzzi	2006	Neuromuscular disorders in clinical practice: case studies	Neurol Clin
J. R. Burrell; C. Yiannikas; D. Rowe; M. C. Kiernan	2010	Response of isolated lower motor neuron syndromes to intravenous immunoglobulin	Journal of the Peripheral Nervous System
J. R.-.-S. Thonhoff, E. P., Appel, S. H.	2018	Neuroinflammatory mechanisms in amyotrophic lateral sclerosis pathogenesis	Current opinion in neurology
J. Rozmus	2020	Monogenic Immune Diseases Provide Insights Into the Mechanisms and Treatment of Chronic Graft-Versus-Host Disease	Frontiers in Immunology
J. S. Kim; J. Choi; J. H. Lim; J. H. Moon; B. J. Kim; B. N. Yoon; J. J. Sung; K. W. Lee	2011	Low-dose thapsigargin and wild-type SOD-1 synergistically enhances neurite growth in mouse motoneuronal cells	Amyotrophic Lateral Sclerosis
J. S. Seo; I. S. Baek; Y. H. Leem; T. K. Kim; Y. Cho; S. M. Lee; Y. H. Park; P. L. Han	2011	SK-PC-B70M alleviates neurologic symptoms in G93A-SOD1 amyotrophic lateral sclerosis mice	Brain Research
J. Sábado; A. Casanovas; S. Hernández; L. Piedrafita; M. Hereu; H. Arquég Rodrigo; J. E. Esquerda	2013	Development of a new conformation-specific anti-SOD1 antibody (AJ10) using a P2X4-like human SOD1 peptide as immunizing agent: Implications for immunotherapy in ALS mice	Amyotrophic Lateral Sclerosis and Frontotemporal Degeneration
J. Schaefer; H. Kostka; L. Klingelhoefer; K. Conrad	2016	Lower motor neurone disease with biclonal igmparaproteinaemia	Journal of Neuromuscular Diseases
J. Schiefer; G. B. Landwehrmeyer; H. G. Luesse; A. Sprunken; C. Puls; A. Milkereit; E. Milkereit; C. M. Kosinski	2002	Riluzole prolongs survival time and alters nuclear inclusion formation in a transgenic mouse model of Huntington's disease	Movement Disorders
J. Spillane; M. Hayward; N. P. Hirsch; C. Taylor; D. M. Kullmann; R. S. Howard	2012	Late recurrent thymoma in myasthenia gravis: A case series	Journal of Neurology, Neurosurgery and Psychiatry
J. Szymański; J. Janikiewicz; B. Michalska; P. Patalas-Krawczyk; M. Perrone; W. Ziółkowski; J. Duszyński; P. Pinton; A. Dobrzyń; M. R. Więckowski	2017	Interaction of mitochondria with the endoplasmic reticulum and plasma membrane in calcium homeostasis, lipid trafficking and mitochondrial structure	International Journal of Molecular Sciences
J. W. Husseman; D. Nochlin; I. Vincent	2000	Mitotic activation: a convergent mechanism for a cohort of neurodegenerative diseases	Neurobiology of Aging
J. Wang; K. Zuzzio; C. L. Walker	2019	Systemic dental pulp stem cell secretome therapy in a mouse model of amyotrophic lateral sclerosis	Brain Sciences
J. Wang; S. Doré	2007	Inflammation after intracerebral hemorrhage	Journal of Cerebral Blood Flow and Metabolism
J. Yan; L. Y. Xu; A. M. Welsh; D. Chen; T. Hazel; K. Johe; V. E. Koliatsos	2006	Combined immunosuppressive agents or CD4 antibodies prolong survival of human neural stem cell grafts and improve disease outcomes in amyotrophic lateral sclerosis transgenic mice	Stem Cells
J.-.-C. Sabado, A., Rodrigo, H., Arque, G., Esquerda, J. E.	2015	Adverse effects of a SOD1-peptide immunotherapy on SOD1 G93A mouse slow model of amyotrophic lateral sclerosis	Neuroscience
J.-.-K. Tashiro, S., Shinpo, K., Kishimoto, R., Tsuji, S., Sasaki, H.	2007	Role of p53 in neurotoxicity induced by the endoplasmic reticulum stress agent tunicamycin in organotypic slice cultures of rat spinal cord	Journal of neuroscience research
J.-.-Z. Wang, Y., Tang, L., Zhang, N., Fan, D.	2011	Protective effects of resveratrol through the up-regulation of SIRT1 expression in the mutant hSOD1-G93A-bearing motor neuron-like cell culture model of amyotrophic lateral sclerosis	Neuroscience letters
K. C. D. Roet; J. Verhaagen	2014	Understanding the neural repair-promoting properties of olfactory ensheathing cells	Experimental Neurology
K. D. C. Meyer, N.; Borter, P.; Nitsch, R. M.; Montrasio, F.; Grimm, J.	2018	Human antibodies engage intraneuronal C9ORF72 dipeptide repeat proteins	Amyotrophic Lateral Sclerosis and Frontotemporal Degeneration
K. E. Lewis; A. L. Rasmussen; W. Bennett; A. King; A. K. West; R. S. Chung; M. I. Chuah	2014	Microglia and motor neurons during disease progression in the SOD1G93A mouse model of amyotrophic lateral sclerosis: Changes in arginase1 and inducible nitric oxide synthase	Journal of Neuroinflammation
K. Forsberg; K. Graffmo; B. Pakkenberg; M. Weber; M. Nielsen; S. Marklund; T. Brannstrom; P. M. Andersen	2019	Misfolded SOD1 inclusions in patients with mutations in C9orf72 and other ALS/FTD-associated genes	Journal of Neurology Neurosurgery and Psychiatry
K. H. Bridwell; P. A. Anderson; S. D. Boden; A. R. Vaccaro; J. C. Wang	2010	What's new in spine surgery	Journal of Bone and Joint Surgery - Series A
K. H. Warrington Jr; R. W. Herzog	2006	Treatment of human disease by adeno-associated viral gene transfer	Human Genetics
K. H.-.-H. Wollinsky, P. J., Westarp, M. E., Mehrkens, H. H., Kornhuber, H. H.	1992	Cerebrospinal fluid pheresis in Guillain Barre syndrome	Medical hypotheses
K. Hagiwara; H. Murai; H. Ochi; M. Osoegawa; H. Shigeto; Y. Ohyagi; J. I. Kira	2008	Upper motor neuron syndrome associated with subclinical Sjögren's syndrome	Internal Medicine
K. K. Dev	2006	Using RNAi in the clinic	IDrugs
K. K. Midde; A. Broadnax; B. Binion; T. Oglesby; J. Harman; M. Edwards; H. Myler; K. Matys; P. Bennett	2020	Evaluation of single molecule array digital immunoassay technology to quantitate neurofilament light chain	Bioanalysis
K. Kieburtz; C. W. Olanow	2007	Translational experimental therapeutics: The translation of laboratory-based discovery into disease-related therapy	Mount Sinai Journal of Medicine
K. Kisand; P. Peterson	2015	Autoimmune Polyendocrinopathy Candidiasis Ectodermal Dystrophy	Journal of Clinical Immunology
K. Lazaridis; S. J. Tzartos	2020	Myasthenia Gravis: Autoantibody Specificities and Their Role in MG Management	Frontiers in Neurology
K. Makioka; T. Yamazaki; M. Takatama; M. Ikeda; K. Okamoto	2014	Immunolocalization of Smurfl in Hirano bodies	Journal of the Neurological Sciences
K. Malpass	2012	Motor neuron disease: Inflammatory monocytes-a novel therapeutic target for ALS?	Nature Reviews Neurology
K. Marciniuk; R. Taschuk; S. Napper	2013	Evidence for prion-like mechanisms in several neurodegenerative diseases: Potential implications for immunotherapy	Clinical and Developmental Immunology
K. McAvoy; B. K. Jensen; N. Heinsinger; K. Mayer; T. Westergard; A. C. Lepore; A. Haeusler; D. Trotti; P. Pasinelli	2019	Elevated expression of the DNA/RNA-binding protein FUS in astrocytes induces reactivity and spinal motor neuron death in vivo	Amyotrophic Lateral Sclerosis and Frontotemporal Degeneration
K. Miyazaki; I. Nagano; H. Ilieva; M. Shiote; T. Murakami; M. Yokoyama; M. Shoji; K. Abe	2007	Therapeutic benefit of intrathecal injection of insulin-like growth factor-1 in a mouse model of amyotrophic lateral sclerosis	Journal of Cerebral Blood Flow and Metabolism
K. Moodley; P. L. A. Bill; A. I. Bhigjee; V. B. Patel	2019	A comparative study of motor neuron disease in HIV-infected and HIV-uninfected patients	Journal of the Neurological Sciences
K. Okamoto; Y. Fujita; K. Makioka; M. Amari; M. Takatama	2014	Accumulation of TDP-43 outside the central nervous system in individuals with or without amyotrophic lateral sclerosis	European Journal of Neurology
K. P. Johnson	2012	Glatiramer acetate for treatment of relapsing-remitting multiple sclerosis	Expert Review of Neurotherapeutics
K. S. Smith; L. Hoffman; R. A. Rush; N. H. Voelcker; M. L. Rogers	2014	Targeted non-viral gene delivery to motor neurons	Amyotrophic Lateral Sclerosis and Frontotemporal Degeneration
K. S.-.-L. Kim, H. J., An, J., Kim, Y. B., Ra, J. C., Lim, I., Kim, S. U.	2014	Transplantation of human adipose tissue-derived stem cells delays clinical onset and prolongs life span in ALS mouse model	Cell transplantation
K. Sugimoto; M. Mori; K. Shibuya; S. Hirano; M. Beppu; S. Kuwabara	2017	Search for serum autoantibodies in Amyotrophic lateral sclerosis	Journal of the Neurological Sciences
K. Talbot	2007	Neuromuscular disorders: therapeutic advances	Lancet Neurology
K. Talbot; A. Vincent	2014	Advances in the clinical science of the motor unit: From motor neuron to neuromuscular junction	Current Opinion in Neurology
K. Uchimura; T. Foyez; K. Kadomatsu	2013	Characterization and analysis of the 5D4-reactive keratan sulfate expressed in the central nervous system of SOD1G93A, an ALS model mouse	Glycobiology
K. Uchino; G. Ogawa; T. Chiba; K. Hokkoku; Y. Hatanaka; M. Sonoo	2013	Etiological consideration of 26 patients with dropped head syndrome	Journal of the Neurological Sciences
K. Wu; G. L. Hanna; D. R. Rosenberg; P. D. Arnold	2012	The role of glutamate signaling in the pathogenesis and treatment of obsessive-compulsive disorder	Pharmacology Biochemistry and Behavior
K. Yamanaka	2016	Neuroinflammation in aging and neurodegeneration	Clinical and Experimental Neuroimmunology
K.-.-C. Venkova, A., Kamaluddin, Z., Kobalka, P., Siddiqui, S., Hensley, K.	2014	Semaphorin 3A signaling through neuropilin-1 is an early trigger for distal axonopathy in the SOD1G93A mouse model of amyotrophic lateral sclerosis	Journal of neuropathology and experimental neurology
K.-.-F. Meyer, L., Miranda, C. J., Likhite, S., McElroy, S., Renusch, S., Ditsworth, D., Lagier-Tourenne, C., Smith, R. A., Ravits, J., Burghes, A. H., Shaw, P. J., Cleveland, D. W., Kolb, S. J., Kaspar, B. K.	2014	Direct conversion of patient fibroblasts demonstrates non-cell autonomous toxicity of astrocytes to motor neurons in familial and sporadic ALS	Proceedings of the National Academy of Sciences of the United States of America
K.-.-O. Ohnari, K., Higuchi, O., Matsuo, H., Adachi, H.	2018	Late-onset Myasthenia Gravis Accompanied by Amyotrophic Lateral Sclerosis with Antibodies against the Acetylcholine Receptor and Low-density Lipoprotein Receptor-related Protein 4	Internal medicine (Tokyo, Japan)
K.-.-S. Sonoda, K., Tateishi, T., Yamasaki, R., Hayashi, S., Sakae, N., Ohyagi, Y., Iwaki, T., Kira, J.	2013	TAR DNA-binding protein 43 pathology in a case clinically diagnosed with facial-onset sensory and motor neuronopathy syndrome: an autopsied case report and a review of the literature	Journal of the neurological sciences
L. A. Cone; R. Nazemi; M. O. Cone; H. J. V. Giesen; R. Kaiser; H. Köller; K. Wetzel; G. Arendt; A. Moulignier; D. MacGowan	2002	Reversible ALS-like disorder in HIV infection: An ALS-like syndrome with new HIV infection and complete response to antiretroviral therapy [4] (multiple letters)	Neurology
L. Bradley; P. J. Yaworsky; F. S. Walsh	2008	Myostatin as a therapeutic target for musculoskeletal disease	Cellular and Molecular Life Sciences
L. Buee; P. R. Hof; A. Delacourte	1997	Brain microvascular changes in Alzheimer's disease and other dementias	Cerebrovascular Pathology in Alzheimer's Disease
L. Fang; C. Hemion; A. C. Pinho Ferreira Bento; C. C. Bippes; J. Flammer; A. Neutzner	2015	Mitochondrial function in neuronal cells depends on p97/VCP/Cdc48-mediated quality control	Frontiers in Cellular Neuroscience
L. H. Phillips Ii	2009	Between the covers: This month's main articles	Muscle and Nerve
L. Heller; R. Thinard; M. Chevalier; S. Arpag; Y. Jing; R. Greferath; R. Heller; C. Nicolau	2020	Secretion of proteins and antibody fragments from transiently transfected endothelial progenitor cells	Journal of Cellular and Molecular Medicine
L. I. Grad; J. J. Yerbury; B. J. Turner; W. C. Guest; E. Pokrishevsky; M. A. O'Neill; A. Yanai; J. M. Silverman; R. Zeineddine; L. Corcoran; J. R. Kumita; L. Luheshi; M. Yousefi; B. M. Coleman; A. F. Hill; S. S. Plotkin; N. R. Cashman	2013	Intercellular propagated misfolding of wild-type Cu-Zn superoxide dismutase	Prion
L. I.-.-Y. Grad, J. J., Turner, B. J., Guest, W. C., Pokrishevsky, E., O'Neill, M. A., Yanai, A., Silverman, J. M., Zeineddine, R., Corcoran, L., Kumita, J. R., Luheshi, L. M., Yousefi, M., Coleman, B. M., Hill, A. F., Plotkin, S. S., Mackenzie, I. R., Cashman, N. R.	2014	Intercellular propagated misfolding of wild-type Cu/Zn superoxide dismutase occurs via exosome-dependent and -independent mechanisms	Proceedings of the National Academy of Sciences of the United States of America
L. J. Martin; M. V. Niedzwiecki; M. Wong	2021	Chronic intermittent mild whole-body hypothermia is therapeutic in a mouse model of ALS	Cells
L. Lecanu; V. Papadopoulos	2007	Cutting-edge patents in Alzheimer's disease drug discovery: Anticipation of potential future treatments	Recent Patents on CNS Drug Discovery
L. Li; A. Huang; N. R. Cahsman	2010	Exploitation of PrP misfolding epitopes in cancer immunotherapy	Prion
L. Lorigados; N. Pavon; T. Serrano; M. A. Robinson	1998	Nerve growth factor and neurological illnesses	Revista De Neurologia
L. M. Nguyen, F.; Pattamatta, A.; Bardhi, O.; Meyer, K.; Nakamura, K.; Banez-Coronel, M.; Zu, T.; Grimm, J.; Ranum, L. P.	2018	Antibody therapy targeting RAN proteins rescues ALS/FTD in C9orf72, BAC mice	Amyotrophic Lateral Sclerosis and Frontotemporal Degeneration
L. Missiaen; W. Robberecht; L. Van Den Bosch; G. Callewaert; J. B. Parys; F. Wuytack; L. Raeymaekers; B. Nilius; J. Eggermont; H. De Smedt	2000	Abnormal intracellular Ca2+ homeostasis and disease	Cell Calcium
L. N. Bowen; R. Tyagi; W. Li; T. Alfahad; B. Smith; M. Wright; E. J. Singer; A. Nath	2016	Motor neuron disease with HIV infection: Activation of HERV-K and response to anti-retroviral therapy	Annals of Neurology
L. N. Ranum, L.; Montrasio, F.; Bardhi, O.; Guo, S.; Tusi, S. K.; Nakamura, K.; Coronel, M. B.; Sonenberg, N.; Grimm, J.; Zu, T.	2019	Targeting ran proteins improves phenotypes in C9ORF72 BAC ALS/FTD mice	Journal of Neurochemistry
L. Nucifora; M. MacDonald; B. Lee; M. Peters; A. Norris; Y. W. Wu; J. Pevsner; R. Margolis; R. Sweet; C. Ross; A. Sawa; F. Nucifora	2016	Abnormal protein insolubility in brains from a subset of patients with schizophrenia	Neuropsychopharmacology
L. P. Rowland	2011	HIV-related neuromuscular diseases: nemaline myopathy, amyotrophic lateral sclerosis and bibrachial amyotrophic diplegia	Acta Myol
L. P. Rowland	1994	AMYOTROPHIC-LATERAL-SCLEROSIS	Current Opinion in Neurology
L. Petrucelli	2014	Mechanisms of toxicityand therapeutic approaches for c9FTD/ALS	Alzheimer's and Dementia
L. Petrucelli; Y. Zhang; T. Gendron; M. Prudencio; V. Belzil	2015	Therapeutic strategies to combat molecular mechanisms of toxicity in FTD/ALS	Neurodegenerative Diseases
L. S. Vaughn; B. Snee; R. C. Patel	2014	Inhibition of PKR protects against tunicamycin-induced apoptosis in neuroblastoma cells	Gene
L. Tenenbaum; A. Chtarto; E. Lehtonen; T. Velu; J. Brotchi; M. Levivier	2004	Recombinant AAV-mediated gene delivery to the central nervous system	Journal of Gene Medicine
L. Vidal; A. Mangas; M. Geffard	2017	A new therapeutic approach to auto-immune diseases: Endotherapia	Annals of Oncology
L. Vlam; S. Piepers; N. Sutedja; B. Jacobs; H. Franssen; J. Veldink; E. Cats; F. Brugman; N. Notermans; L. Van Der Pol; L. Van Den Berg	2013	Monoclonal gammopathy in the full spectrum of motor neuron disorders and multifocal motor neuropathy	Neurology
L. Vlam; W. L. van der Pol; E. A. Cats; D. C. Straver; S. Piepers; H. Franssen; L. H. van den Berg	2012	Multifocal motor neuropathy: diagnosis, pathogenesis and treatment strategies	Nature Reviews Neurology
L. Yu; X. Su; S. Li; F. Zhao; D. Mu; Y. Qu	2020	Microglia and Their Promising Role in Ischemic Brain Injuries: An Update	Frontiers in Cellular Neuroscience
L.-.-C. Lam, L., Halder, R. C., Sagong, B., Famenini, S., Sayre, J., Montoya, D., Rubbi, L., Pellegrini, M., Fiala, M.	2016	Epigenetic changes in T-cell and monocyte signatures and production of neurotoxic cytokines in ALS patients	FASEB journal
L.-.-H. Buee, P. R., Delacourte, A.	1997	Brain microvascular changes in Alzheimer's disease and other dementias	Annals of the New York Academy of Sciences
L.-.-M. Nguyen, F., Pattamatta, A., Tusi, S. K., Bardhi, O., Meyer, K. D., Hayes, L., Nakamura, K., Banez-Coronel, M., Coyne, A., Guo, S., Laboissonniere, L. A., Gu, Y., Narayanan, S., Smith, B., Nitsch, R. M., Kankel, M. W., Rushe, M., Rothstein, J., Zu, T., Grimm, J., Ranum, L. P. W.	2020	Antibody Therapy Targeting RAN Proteins Rescues C9 ALS/FTD Phenotypes in C9orf72 Mouse Model	Neuron
L.-.-M. Radick, S. R.	2015	The Latest Innovations in the Drug Pipeline for Multiple Sclerosis	American health & drug benefits
L.-.-P. Vlam, S., Sutedja, N. A., Jacobs, B. C., Tio-Gillen, A. P., Stam, M., Franssen, H., Veldink, J. H., Cats, E. A., Notermans, N. C., Bloem, A. C., Wadman, R. I., van der Pol, W. L., van den Berg, L. H.	2015	Association of IgM monoclonal gammopathy with progressive muscular atrophy and multifocal motor neuropathy: a case-control study	Journal of neurology
L.-.-R. Schoonaert, L., Roucourt, B., Timmers, M., Little, S., Chavez-Gutierrez, L., Dewilde, M., Joyce, P., Curnock, A., Weber, P., Haustraete, J., Hassanzadeh-Ghassabeh, G., De Strooper, B., Van Den Bosch, L., Van Damme, P., Lemmens, R., Robberecht, W.	2017	Identification and characterization of Nanobodies targeting the EphA4 receptor	The Journal of biological chemistry
M. A. Robert; R. Gilbert; B. Gaillet	2017	Antibody Delivery Mediated by Recombinant Adeno-associated Virus for the Treatment of Various Chronic and Infectious Diseases	Curr Gene Ther
M. A. S. Zella; J. Metzdorf; F. Ostendorf; F. Maass; S. Muhlack; R. Gold; A. Haghikia; L. Tönges	2019	Novel immunotherapeutic approaches to target alpha-synuclein and related neuroinflammation in parkinson’s disease	Cells
M. A.-.-G. Robert, R., Gaillet, B.	2017	Antibody Delivery Mediated by Recombinant Adeno-associated Virus for the Treatment of Various Chronic and Infectious Diseases	Current gene therapy
M. A.-.-M.-D. Davis-Lopez de Carrizosa, C. J., Morcuende, S., de la Cruz, R. R., Pastor, A. M.	2010	Nerve growth factor regulates the firing patterns and synaptic composition of motoneurons	The Journal of neuroscience
M. Breithaupt; J. Schmidt	2013	Update on treatment of inclusion body myositis	Current Rheumatology Reports
M. C. A. Dalakas, H.; Spaeth, P. J.	2020	Complement in neurological disorders and emerging complement-targeted therapeutics	Nature Reviews Neurology
M. C. Dalakas	1994	High-dose intravenous immunoglobulin and serum viscosity: risk of precipitating thromboembolic events	Neurology
M. C. Vigliani; P. Polo; A. Chio; B. Giometto; L. Mazzini; D. Schiffer	2000	Patients with amyotrophic lateral sclerosis and cancer do not differ clinically from patients with sporadic amyotrophic lateral sclerosis	Journal of Neurology
M. C.-.-S. Dalakas, D. P., Otero, C., Sekul, E., Cupler, E. J., McCrosky, S.	1994	Effect of high-dose intravenous immunoglobulin on amyotrophic lateral sclerosis and multifocal motor neuropathy	Archives of neurology
M. Cappella; P. F. Pradat; G. Querin; M. G. Biferi	2021	Beyond the Traditional Clinical Trials for Amyotrophic Lateral Sclerosis and the Future Impact of Gene Therapy	Journal of Neuromuscular Diseases
M. Chelladurai; S. Damodaran; R. Sahasranam; V. D. Srinivasan; K. Vijayan; G. Margavelu	2015	Neurodegenerative and neuroinflammatory disarrays in progenies and adults	International Journal of Pharma and Bio Sciences
M. Collins; R. Rice; R. Bowser	2013	The RNA-binding protein RBM45 associates with nuclear stress bodies during cellular stress events	Amyotrophic Lateral Sclerosis and Frontotemporal Degeneration
M. D. Disney	2017	Inhibiting Translation One Protein at a Time	Trends in Biochemical Sciences
M. D. Nguyen; M. Boudreau; J. Kriz; S. Couillard-Despres; D. R. Kaplan; J. P. Julien	2003	Cell cycle regulators in the neuronal death pathway of amyotrophic lateral sclerosis caused by mutant superoxide dismutase 1	Journal of Neuroscience
M. de Carrizosa; C. J. Morado-Diaz; S. Morcuende; R. R. de la Cruz; A. M. Pastor	2010	Nerve Growth Factor Regulates the Firing Patterns and Synaptic Composition of Motoneurons	Journal of Neuroscience
M. Dziadzio; V. Reddy; S. Rahman; C. Mummery; A. Keat	2006	Is TNFalpha really a good therapeutic target in motoneuronal degeneration? A case of amyotrophic lateral sclerosis in a patient with RA receiving infliximab	Rheumatology (Oxford)
M. E. Gurney	1984	Suppression of sprouting at the neuromuscular junction by immune sera	Nature
M. E. Westarp; G. Kolde; K. P. Westphal; P. J. Hulser; M. P. Westarp; K. H. Wollinsky; H. H. Kornhuber	1992	Amyotrophic lateral sclerosis: Dermal and body fluid alterations with and without intrathecal interferon-beta treatment	Neurology Psychiatry and Brain Research
M. E.-.-B. Westarp, P., Kornhuber, H. H.	1994	Immunoglobulin-G isotype changes in human sporadic amyotrophic lateral sclerosis (ALS)	Neuroscience letters
M. E.-.-B. Westarp, P., Rossler, J., Geiger, E., Westphal, K. P., Schreiber, H., Fuchs, D., Westarp, M. P., Kornhuber, H. H.	1993	Antiretroviral therapy in sporadic adult amyotrophic lateral sclerosis	Neuroreport
M. E.-.-F. Westarp, D., Bartmann, P., Hoff-Jorgensen, R., Clausen, J., Wachter, H., Kornhuber, H. H.	1993	Amyotrophic lateral sclerosis an enigmatic disease with B-cellular and anti-retroviral immune responses	The European journal of medicine
M. E.-.-G. Alexianu, C. L.	2004	Advances in neuromuscular disease 2003: the year in review	Journal of clinical neuromuscular disease
M. E.-.-W. Maldonado, R. C., Jr., Adair, J. C., Hart, B. L., Gregg, L., Sibbitt, W. L., Jr.	2002	Neuropsychiatric systemic lupus erythematosus presenting as amyotrophic lateral sclerosis	The Journal of rheumatology
M. E.-.-W. Westarp, K. P., Kolde, G., Wollinsky, K. H., Westarp, M. P., Dickob, M., Kornhuber, H. H.	1992	Dermal, serological and CSF changes in amyotrophic lateral sclerosis with and without intrathecal interferon beta treatment	International journal of clinical pharmacology, therapy, and toxicology
M. G. H. Van Westerlaak; E. A. J. Joosten; A. A. M. Gribnau; A. R. Cools; P. R. Bar	2001	Chronic mitochondrial inhibition induces glutamate-mediated corticomotoneuron death in an organotypic culture model	Experimental Neurology
M. G.-.-B. Hanna, U. A., Benveniste, O., Lloyd, T. E., Needham, M., Chinoy, H., Aoki, M., Machado, P. M., Liang, C., Reardon, K. A., de Visser, M., Ascherman, D. P., Barohn, R. J., Dimachkie, M. M., Miller, J. A. L., Kissel, J. T., Oskarsson, B., Joyce, N. C., Van den Bergh, P., Baets, J., De Bleecker, J. L., Karam, C., David, W. S., Mirabella, M., Nations, S. P., Jung, H. H., Pegoraro, E., Maggi…	2019	Safety and efficacy of intravenous bimagrumab in inclusion body myositis (RESILIENT): a randomised, double-blind, placebo-controlled phase 2b trial	The Lancet. Neurology
M. Gavriilaki; V. K. Kimiskidis; E. Gavriilaki	2020	Precision Medicine in Neurology: The Inspirational Paradigm of Complement Therapeutics	Pharmaceuticals
M. Giannini; D. Sproviero; M. Bordoni; L. Diamanti; J. Vinet; S. Gagliardi; S. Carra; O. Pansarasa; C. Cereda	2018	R-loops and stress granules interaction in amyotrophic lateral sclerosis	Amyotrophic Lateral Sclerosis and Frontotemporal Degeneration
M. Godani; M. Zoccarato; A. Beronio; L. Zuliani; L. Benedetti; B. Giometto; M. Del Sette; E. Raggio; R. Baldi; A. Vincent	2016	Voltage-Gated Potassium Channel Antibodies in Slow-Progression Motor Neuron Disease	Neurodegenerative Diseases
M. H. Lee; H. C. Pant; N. Amin; T. Wang; A. Nath	2012	Aberrant neurite outgrowth by HIV-gp120 is mediated via activation of Cdk5	Journal of NeuroVirology
M. H. Smith	2012	Stem cell protocol literatures	Stem Cell
M. H.-.-W. Alanazy, C., Korngut, L.	2014	Diagnostic yield and cost-effectiveness of investigations in patients presenting with isolated lower motor neuron signs	Amyotrophic lateral sclerosis & frontotemporal degeneration
M. Hasegawa; T. Nonaka; H. Tsuji; A. Tamaoka; M. Yamashita; F. Kametani; M. Yoshida; T. Arai; H. Akiyama	2011	Molecular Dissection of TDP-43 Proteinopathies	Journal of Molecular Neuroscience
M. Hasegawa; T. Nonaka; H. Tsuji; M. Yamashita; F. Kametani; A. Tamaoka; T. Arai; H. Akiyama	2010	Molecular dissection of TDP-43 proteinopathy	Dementia and Geriatric Cognitive Disorders
M. I. Diamond	2013	Introduction	Neurotherapeutics
M. I. Saad; M. A. Kamel; T. M. Abdelkhalek; M. M. Saleh; S. H. Tawfik	2015	Recent patents and advances in regenerative medicine and stem cell therapies for diabetes, cardiovascular and neurodegenerative diseases	Recent Patents on Regenerative Medicine
M. Ishiguro; A. Okada; K. Asai; K. Kojima; H. Okada	2016	Stimulation of neuronal cells by culture supernatant of T lymphocytes triggered by anti-CD3 mAb followed by propagation in the presence of interleukin-2	Microbiol Immunol
M. J. Strong	2002	Biochemical markers: summary	Amyotroph Lateral Scler Other Motor Neuron Disord
M. K. McCoy; M. G. Tansey	2008	TNF signaling inhibition in the CNS: Implications for normal brain function and neurodegenerative disease	Journal of Neuroinflammation
M. Kannan; J. Glass	2016	The evaluation and management of alternative diagnoses in amyotrophic lateral sclerosis	Neurology
M. Katsuno; H. Watanabe; F. Tanaka; G. Sobue	2013	Translational research on disease-modifying therapies for neurodegenerative diseases	Neurology and Clinical Neuroscience
M. Kiaei	2013	New hopes and challenges for treatment of neurodegenerative disorders: Great opportunities for Young neuroscientists	Basic and Clinical Neuroscience
M. King; A. Skorupa; B. Breen; J. Prehn	2009	Angiogenin signalling in the spinal cord	Amyotrophic Lateral Sclerosis
M. Komori; Y. Matsuyama; T. Nirasawa; H. Thiele; T. Saida; M. Tanaka; H. Tomimoto; R. Takahashi; K. Tashiro; M. Ikegawa; T. Kondo	2009	Cerebrospinal fluid proteome profiles of patients with multiple sclerosis	Multiple Sclerosis
M. Kondo; T. Shibata; T. Kumagai; T. Osawa; N. Shibata; M. Kobayashi; S. Sasaki; M. Iwata; N. Noguchi; K. Uchida	2002	15-Deoxy-Δ12,14-prostaglandin J2: The endogenous electrophile that induces neuronal apoptosis	Proceedings of the National Academy of Sciences of the United States of America
M. Kopf; M. F. Bachmann; B. J. Marsland	2010	Averting inflammation by targeting the cytokine environment	Nature Reviews Drug Discovery
M. Kuoppamäki; K. Lindstedt; J. Levijoki; O. Hanni; L. Nyman; U. Pesonen; M. Kivikko; J. Rouru; E. Mervaala	2017	Scientific background for developing oral levosimendan (ODM-109) for the treatment of amyotrophic lateral sclerosis	Amyotrophic Lateral Sclerosis and Frontotemporal Degeneration
M. L. Rogers; D. Matusica; K. Smith; R. Rush	2011	Non-viral gene delivery for motor neurons	Amyotrophic Lateral Sclerosis
M. L. Rogers; R. A. Rush	2012	Non-viral gene therapy for neurological diseases, with an emphasis on targeted gene delivery	Journal of Controlled Release
M. L.-.-S. Rogers, K. S., Matusica, D., Fenech, M., Hoffman, L., Rush, R. A., Voelcker, N. H.	2014	Non-viral gene therapy that targets motor neurons in vivo	Frontiers in molecular neuroscience
M. Lehmann; M. Marklund; A. L. Bolender; E. E. Bidhendi; P. Zetterstrom; P. M. Andersen; T. Brannstrom; S. L. Marklund; J. D. Gilthorpe; U. Nordstrom	2020	Aggregate-selective antibody attenuates seeded aggregation but not spontaneously evolving disease in SOD1 ALS model mice	Acta Neuropathologica Communications
M. M. Van Benschoten	1995	Acupoint diagnostics and autoimmune disease	American Journal of Acupuncture
M. Mangelsdorf; J. Zhao; R. K. Narayanan; T. J. Butler; R. D. Henderson; P. A. McCombe; P. F. Bartlett	2014	Charactering novel alternatively spliced isoforms of the EPHA4 gene	Amyotrophic Lateral Sclerosis and Frontotemporal Degeneration
M. Mir; V. J. Asensio; L. Tolosa; M. Gou-Fabregas; R. Soler; J. Lladó; G. Olmos	2009	Tumor necrosis factor alpha and interferon gamma cooperatively induce oxidative stress and motoneuron death in a new model of rat spinal cord embryonic explants	Amyotrophic Lateral Sclerosis
M. Mohan; C. M. Okeoma; K. Sestak	2020	Dietary gluten and neurodegeneration: A case for preclinical studies	International Journal of Molecular Sciences
M. Moreno-Igoa; A. C. Calvo; C. Penas; R. Manzano; S. Oliván; M. J. Muñoz; R. Mancuso; P. Zaragoza; J. Aguilera; X. Navarro; R. Osta Pinzolas	2010	Fragment C of tetanus toxin, more than a carrier. Novel perspectives in non-viral ALS gene therapy	Journal of Molecular Medicine
M. Moriya; M. Aihara; M. Imai; Y. Ikezawa; S. Matsukura; T. Kanbara; Y. Baba; Z. Ikezawa	2013	Atypical drug-induced hypersensitivity syndrome with human herpesvirus 6 reactivation due to calcium blockers	Journal of Dermatology
M. Morris; S. Maeda; K. Vossel; L. Mucke	2011	The Many Faces of Tau	Neuron
M. Naujock; N. Stanslowsky; S. Bufler; M. Naumann; P. Reinhardt; J. Sterneckert; E. Kefalakes; C. Kassebaum; F. Bursch; X. Lojewski; A. Storch; M. Frickenhaus; T. M. Boeckers; S. Putz; M. Demestre; S. Liebau; M. Klingenstein; A. C. Ludolph; R. Dengler; K. S. Kim; A. Hermann; F. Wegner; S. Petri	2016	4-Aminopyridine Induced Activity Rescues Hypoexcitable Motor Neurons from Amyotrophic Lateral Sclerosis Patient-Derived Induced Pluripotent Stem Cells	Stem Cells
M. P. Collins	2012	The vasculitic neuropathies: an update	Current Opinion in Neurology
M. P. Schneider; M. E. Schwab; T. M. Kessler	2015	Anti-Nogo-A antibody: A treatment option for neurogenic lower urinary tract dysfunction?	BJU International
M. P.-.-J. Hefferan, K., Hazel, T., Feldman, E. L., Lunn, J. S., Marsala, M.	2011	Optimization of immunosuppressive therapy for spinal grafting of human spinal stem cells in a rat model of ALS	Cell transplantation
M. Padovan; L. M. Caniatti; F. Trotta; M. Govoni	2011	Concomitant rheumatoid arthritis and amyotrophic lateral sclerosis: report of two new cases and review of literature	Rheumatol Int
M. Perica; D. Mitrecic; P. R. Andjus	2017	Targeting astrocytes for treatment in amyotrophic lateral sclerosis	Current Pharmaceutical Design
M. Peviani; I. Caron; C. Pizzasegola; F. Gensano; M. Tortarolo; C. Bendotti	2010	Unraveling the complexity of amyotrophic lateral sclerosis: Recent advances from the transgenic mutant SOD1 mice	CNS and Neurological Disorders - Drug Targets
M. R. Mattson	2007	Calcium and neurodegeneration	Aging Cell
M. R.-.-J. Vargas, D. A., Sirkis, D. W., Messing, A., Johnson, J. A.	2008	Nrf2 activation in astrocytes protects against neurodegeneration in mouse models of familial amyotrophic lateral sclerosis	The Journal of neuroscience
M. R.-.-S. Turner, J., Goodfellow, J. A., Lord, M. E., Marsden, R., Talbot, K.	2010	The diagnostic pathway and prognosis in bulbar-onset amyotrophic lateral sclerosis	Journal of the neurological sciences
M. Rodriguez	2016	Human recombinant monoclonal antibodies as therapy for demyelinating and degenerative CNS disorders	Multiple Sclerosis
M. Rodriguez; A. E. Warrington; L. R. Pease	2009	Invited Article: Human natural autoantibodies in the treatment of neurologic disease	Neurology
M. Rosario; R. Bedlack	2014	Paraneoplastic antibodies in patients with amyotrophic lateral sclerosis	Neurology
M. Rosener; H. Hahn; M. Kranz; J. Heeney; A. Rethwilm	1996	Absence of serological evidence for foamy virus infection in patients with amyotrophic lateral sclerosis	Journal of Medical Virology
M. S. Lyon; M. Wosiski-Kuhn; R. Gillespie; J. Caress; C. Milligan	2019	Inflammation, Immunity, and amyotrophic lateral sclerosis: I. Etiology and pathology	Muscle & Nerve
M. S. Van Der Knaap; R. H. W. M. Derksen	1986	Plasma exchange in hands of the neurologist	Clinical Neurology and Neurosurgery
M. S. Weinberg; R. J. Samulski; T. J. McCown	2013	Adeno-associated virus (AAV) gene therapy for neurological disease	Neuropharmacology
M. S.-.-A. Rotunno, J. R., Maniatis, S., Shaffer, S. A., Agar, J., Bosco, D. A.	2014	Identification of a misfolded region in superoxide dismutase 1 that is exposed in amyotrophic lateral sclerosis	The Journal of biological chemistry
M. Salama; T. F. Yuan; S. Machado; E. Murillo-Rodríguez; J. A. Vega; M. Menéndez-González; A. E. Nardi; O. Arias-Carrión	2013	Co-Enzyme Q10 to treat neurological disorders: Basic mechanisms, clinical outcomes, and future research direction	CNS and Neurological Disorders - Drug Targets
M. Schubert; X. Breakefield; H. Federoff; R. M. Frederickson; P. R. Lowenstein	2008	Gene delivery to the nervous system	Molecular Therapy
M. Shi; Z. W. Liu; F. S. Wang	2011	Immunomodulatory properties and therapeutic application of mesenchymal stem cells	Clinical and Experimental Immunology
M. Srikanth; J. A. Kessler	2012	Nanotechnology - Novel therapeutics for CNS disorders	Nature Reviews Neurology
M. Strupp	2005	Vaccination against herpes zoster, small RNA against ALS and IgG antibodies in stiff-person syndrome	J Neurol
M. Sugawara; K. Obara; S. Nakanishi; O. Higuchi; S. Nakane	2019	Anti-ganglionic acetylcholine receptor antibody causes prolonged megacolon in a patient with amyotrophic lateral sclerosis	Neurology and Clinical Neuroscience
M. Suzuki; A. Mochizuki; H. Yoshizawa; Y. Shimizu; S. Uchiyama	2011	Acquired neuromyotonia (Isaacs' syndrome): Three case reports and a literature review	Journal of Neurology
M. Tibshirani; B. Zhao; B. J. Gentil; S. Minotti; C. Marques; J. Keith; E. Rogaeva; L. Zinman; C. Rouaux; J. Robertson; H. D. Durham	2017	Dysregulation of chromatin remodelling complexes in amyotrophic lateral sclerosis	Human Molecular Genetics
M. Tognolini; I. Hassan-Mohamed; C. Giorgio; I. Zanotti; A. Lodola	2014	Therapeutic perspectives of Eph-ephrin system modulation	Drug Discovery Today
M. Tortarolo; E. Battaglia; D. Lidonnici; F. Gensano; C. Bendotti	2012	Tnf-alpha receptor type 2 is implicated in motor neuron loss occurring in a cellular model of amyotrophic lateral sclerosis	Amyotrophic Lateral Sclerosis
M. Urushitani	2010	Immunotherapy of amyotrophic lateral sclerosis	Neuroscience Research
M. Verma; A. Vats; V. Taneja	2015	Toxic species in amyloid disorders: Oligomers or mature fibrils	Annals of Indian Academy of Neurology
M. Y. Khan; I. N. Khan; M. Farman; S. Al Karim; I. Qadri; M. A. Kamal; K. Al Ghamdi; S. Harakeh	2017	HTLV-1 associated neurological disorders	Current Topics in Medicinal Chemistry
M. Yan; G. L. Xing; W. C. Xiong; L. Mei	2018	Agrin and LRP4 antibodies as new biomarkers of myasthenia gravis	Annals of the New York Academy of Sciences
M.-.-B. Gravel, L. C., Soucy, G., Abdelhamid, E., Rahimian, R., Gravel, C., Kriz, J.	2016	IL-10 Controls Early Microglial Phenotypes and Disease Onset in ALS Caused by Misfolded Superoxide Dismutase 1	The Journal of neuroscience
M.-.-B. Qureshi, R. S., Cudkowicz, M. E.	2009	Lyme disease serology in amyotrophic lateral sclerosis	Muscle & nerve
M.-.-C. Cai, S. M., Song, B. K., Son, I., Kim, S., Yang, E. J.	2013	Scolopendra subspinipes mutilans attenuates neuroinflammation in symptomatic hSOD1(G93A) mice	Journal of neuroinflammation
M.-.-d. B. Geffard, L., Duleu, S., Hassaine, N., Mangas, A., Covenas, R.	2010	Endotherapia: a new frontier in the treatment of multiple sclerosis and other chronic diseases	Discovery medicine
M.-.-E. Urushitani, S. A., Julien, J. P.	2007	Therapeutic effects of immunization with mutant superoxide dismutase in mice models of amyotrophic lateral sclerosis	Proceedings of the National Academy of Sciences of the United States of America
M.-.-F. Saadatnia, F., Basiri, K., Sariaslani, P.	2008	ALS-LAUS syndrome in a patient with high level of antiphospholipid antibodies: a case report	Neurologia i neurochirurgia polska
M.-.-G. D. Meyer, M. C., Gargiulo-Monachelli, G., Lima, A., Roig, P., Guennoun, R., Schumacher, M., De Nicola, A. F.	2013	Progesterone attenuates several hippocampal abnormalities of the Wobbler mouse	Journal of neuroendocrinology
M.-.-G. D. Meyer, M. C., Hunt, H., de Kloet, E. R., De Nicola, A. F.	2014	The selective glucocorticoid receptor modulator CORT108297 restores faulty hippocampal parameters in Wobbler and corticosterone-treated mice	The Journal of steroid biochemistry and molecular biology
M.-.-G. Valbonesi, S., Montani, F., Manca, F., Cantarella, S.	1982	Plasma exchange and immune complex diseases: the predictability of immune complexes removal to clinical response	Vox sanguinis
M.-.-K. Kiaei, K., Petri, S., Chen, J., Calingasan, N. Y., Beal, M. F.	2005	Celastrol blocks neuronal cell death and extends life in transgenic mouse model of amyotrophic lateral sclerosis	Neuro-degenerative diseases
M.-.-L. Yamamoto, M., Mitsuma, N., Ito, S., Kato, M., Takahashi, M., Sobue, G.	2001	Preserved phosphorylation of RET receptor protein in spinal motor neurons of patients with amyotrophic lateral sclerosis: an immunohistochemical study by a phosphorylation-specific antibody at tyrosine 1062	Brain research
M.-.-M. Fiala, M. T., Weitzman, R., Magpantay, L., Nishimoto, N.	2013	Tocilizumab infusion therapy normalizes inflammation in sporadic ALS patients	American journal of neurodegenerative disease
M.-.-M. Komori, Y., Nirasawa, T., Thiele, H., Becker, M., Alexandrov, T., Saida, T., Tanaka, M., Matsuo, H., Tomimoto, H., Takahashi, R., Tashiro, K., Ikegawa, M., Kondo, T.	2012	Proteomic pattern analysis discriminates among multiple sclerosis-related disorders	Annals of neurology
M.-.-M. Lee, E., McGeer, P. L.	2013	Neurotoxins released from interferon-gamma-stimulated human astrocytes	Neuroscience
M.-.-M. Milosevic, K., Bozic, I., Lavrnja, I., Stevanovic, I., Bijelic, D., Dubaic, M., Zivkovic, I., Stevic, Z., Giniatullin, R., Andjus, P.	2017	Immunoglobulins G from Sera of Amyotrophic Lateral Sclerosis Patients Induce Oxidative Stress and Upregulation of Antioxidative System in BV-2 Microglial Cell Line	Frontiers in immunology
M.-.-N.-O. Carpo, E., Meucci, N., Gamba, M., Barbieri, S., Allaria, S., Scarlato, G.	1996	Anti-GD1a ganglioside antibodies in peripheral motor syndromes	Annals of neurology
M.-.-P. Demestre, A., Orrell, R. W., Orth, M.	2005	ALS-IgG-induced selective motor neurone apoptosis in rat mixed primary spinal cord cultures	Journal of neurochemistry
M.-.-P. Kiaei, S., Kipiani, K., Gardian, G., Choi, D. K., Chen, J., Calingasan, N. Y., Schafer, P., Muller, G. W., Stewart, C., Hensley, K., Beal, M. F.	2006	Thalidomide and lenalidomide extend survival in a transgenic mouse model of amyotrophic lateral sclerosis	The Journal of neuroscience
M.-.-S. Bowerman, C., Coque, E., Eiselt, E., Deschaumes, R. G., Brodovitch, A., Burkly, L. C., Scamps, F., Raoul, C.	2015	Tweak regulates astrogliosis, microgliosis and skeletal muscle atrophy in a mouse model of amyotrophic lateral sclerosis	Human molecular genetics
M.-.-W. Maier, T., Wirth, F., Montrasio, F., Preisig, D., McAfoose, J., Vieira, F. G., Kulic, L., Spani, C., Stehle, T., Perrin, S., Weber, M., Hock, C., Nitsch, R. M., Grimm, J.	2018	A human-derived antibody targets misfolded SOD1 and ameliorates motor symptoms in mouse models of amyotrophic lateral sclerosis	Science translational medicine
N. A. Ansari; Z. Rasheed	2009	Non-enzymatic glycation of proteins: From diabetes to cancer	Biochemistry (Moscow) Supplement Series B: Biomedical Chemistry
N. A.-.-S. Muma, S. M.	1996	Aluminum-induced neuropathology: transient changes in microtubule-associated proteins	Neurotoxicology and teratology
N. ArriadaMendicoa; E. OteroSiliceo	1997	Current concepts on amyotrophic lateral sclerosis	Revista Ecuatoriana De Neurologia
N. Borisow; T. Meyer; F. Paul	2013	Concomitant amyotrophic lateral sclerosis and paraclinical laboratory features of multiple sclerosis: Coincidence or causal relationship?	BMJ Case Reports
N. Cashman; S. Louadi; A. Roman; E. Gibbs; A. Dijkstra; J. Kaplan	2020	Generation of antibodies selective for misfolded disease-associated TDP-43	Neurology
N. D. Schmitt; J. N. Agar	2017	Parsing disease-relevant protein modifications from epiphenomena: perspective on the structural basis of SOD1-mediated ALS	Journal of Mass Spectrometry
N. E. Gilhus; J. J. Verschuuren	2015	Myasthenia gravis: Subgroup classification and therapeutic strategies	The Lancet Neurology
N. Fini; R. Plasmati; F. Pastorelli; F. Salvi	2011	Is it ALS? Challenging diagnoses in patients with motor neuron involvement mimicking ALS	Journal of the Peripheral Nervous System
N. Fujiwara; Y. Miyamoto; K. Ogasahara; M. Takahashi; T. Ikegami; R. Takamiya; K. Suzuki; N. Taniguchi	2005	Different immunoreactivity against monoclonal antibodies between wild-type and mutant copper/zinc superoxide dismutase linked to amyotrophic lateral sclerosis	Journal of Biological Chemistry
N. G. Singer; A. I. Caplan	2011	Mesenchymal stem cells: Mechanisms of inflammation
N. Honda; Y. Watanabe; M. Nakanishi; Y. Tokuoka; T. Terashima; M. Katagi; R. Hanajima	2019	Enhanced survival of a transplanted MSC sheet on the mouse cerebrum	Amyotrophic Lateral Sclerosis and Frontotemporal Degeneration
N. J. Silvestri; G. I. Wolfe; M. Bromberg; D. Lacomis	2016	What's in the Literature?	J Clin Neuromuscul Dis
N. Kim; V. Tiongson; P. Pleninger	2017	HTLV-1 presenting as a motor neuropathy	Neurology
N. Kondo; M. Katsuno; H. Adachi; M. Minamiyama; H. Doi; S. Matsumoto; Y. Miyazaki; M. Iida; H. Nakatsuji; G. Tohnai; S. Ishigaki; Y. Fujioka; H. Watanabe; F. Tanaka; A. Nakai; G. Sobue	2013	Heat shock factor-1 (HSF-1) controls pathological lesion distribution of polyglutamine-induced motor neuron disease	Amyotrophic Lateral Sclerosis and Frontotemporal Degeneration
N. L.-.-P. Lamb, B. M.	1991	Clinical correlations of anti-GM1 antibodies in amyotrophic lateral sclerosis and neuropathies	Muscle & nerve
N. Matsui; A. Miyashiro; Y. Shimatani; Y. Izumi; S. Kusunoki; R. Kaji	2012	Epidemiological study of multifocal motor neuropathy in Japan	Clinical and Experimental Neuroimmunology
N. R. Cashman	2011	Prion-like misfolding propagation of superoxide dismutase 1 in ALS	Prion
N. R. Karunaratne; M. Seevaratnam	2010	Motor neurone disease: Diagnosis and management in older patients	CME Journal Geriatric Medicine
N.-.-B. Mele, G., Maisonobe, T., Salachas, F., Nicolas, G., Weiss, N., Beaudonnet, G., Ducray, F., Psimaras, D., Lenglet, T.	2018	Motor neuron disease of paraneoplastic origin: a rare but treatable condition	Journal of neurology
N.-.-C. Ludemann, A., Hans, V. H., Leschik, J., Behl, C., Brandt, R.	2005	O-glycosylation of the tail domain of neurofilament protein M in human neurons and in spinal cord tissue of a rat model of amyotrophic lateral sclerosis (ALS)	The Journal of biological chemistry
N.-.-G.-D. Shahani, M., Nalini, A., Raju, T. R.	2001	Cyclophosphamide attenuates the degenerative changes induced by CSF from patients with amyotrophic lateral sclerosis in the neonatal rat spinal cord	Journal of the neurological sciences
N.-.-G.-D. Shahani, M., Nalini, A., Rammohan, P., Shobha, K., Harsha, H. N., Raju, T. R.	2004	(-)-Deprenyl alleviates the degenerative changes induced in the neonatal rat spinal cord by CSF from amyotrophic lateral sclerosis patients	Amyotrophic lateral sclerosis
N.-.-I. Furuta, K., Shibata, M., Tsukagoshi, S., Nagamine, S., Makioka, K., Fujita, Y., Ikeda, M., Yoshimura, S., Motomura, M., Okamoto, K., Ikeda, Y.	2015	Anti-MuSK Antibody-positive Myasthenia Gravis Mimicking Amyotrophic Lateral Sclerosis	Internal medicine (Tokyo, Japan)
N.-.-N.-O. Meucci, E., Scarlato, G.	1996	Intravenous immunoglobulin therapy in amyotrophic lateral sclerosis	Journal of neurology
N.-.-Y. Yuki, C., Sudo, M., Funakoshi, M., Ishida, H., Mori, M., Kanda, F., Hirata, K.	2014	Lower motor neuron syndrome associated with IgG anti-GM1 antibodies revisited	Journal of neuroimmunology
O. Chosidow; V. Doppler; G. Bensimon; P. Joly; F. Salachas; L. Lacomblez; C. Prost; W. Camu; C. Francès; S. Herson; V. Meininger	2000	Bullous pemphigoid and amyotrophic lateral sclerosis: a new clue for understanding the bullous disease?	Arch Dermatol
O. D.-.-S. Uchitel, F., Protti, D. A., Fumberg, C. G., Alvarez, V., Appel, S. H.	1992	Long-term neuromuscular dysfunction produced by passive transfer of amyotrophic lateral sclerosis immunoglobulins	Neurology
O. Golubnitschaja	2010	Neurodegeneration: Accelerated ageing or inadequate healthcare?	EPMA Journal
O. Hauser; E. Prieschl-Grassauer; B. Salmons	2004	Encapsulated, genetically modified cells producing in vivo therapeutics	Current Opinion in Molecular Therapeutics
O. Milhavet; D. S. Gary; M. P. Mattson	2003	RNA Interference in Biology and Medicine	Pharmacological Reviews
O. N. Deeb, M.	2020	Exploring multiple sclerosis (MS) and amyotrophic lateral sclerosis (ALS) as neurodegenerative diseases and their treatments: A review study	Current Topics in Medicinal Chemistry
O. R. Joassard; A. C. Durieux; D. G. Freyssenet	2013	β2-Adrenergic agonists and the treatment of skeletal muscle wasting disorders	International Journal of Biochemistry and Cell Biology
O. S. Butovsky, S.; Gabriely, G.; Lanser, A. J.; Dake, B.; Murugaiyan, G.; Doykan, C. E.; Wu, P. M.; Gali, R. R.; Iyer, L. K.; Lawson, R.; Berry, J.; Krichevsky, A. M.; Cudkowicz, M. E.; Weiner, H. L.	2012	Modulating inflammatory monocytes with a unique microRNA gene signature ameliorates murine ALS	J Clin Invest
O. Schulte-Herbrüggen; A. Braun; S. Rochlitzer; M. C. Jockers-Scherübl; R. Hellweg	2007	Neurotrophic factors - A tool for therapeutic strategies in neurological, neuropsychiatric and neuroimmunological diseases?	Current Medicinal Chemistry
P. A. McCombe; J. D. Lee; T. M. Woodruff; R. D. Henderson	2020	The Peripheral Immune System and Amyotrophic Lateral Sclerosis	Frontiers in Neurology
P. A. Tonali	2003	Clinical neurophysiology in neuromuscular disorders: Usefulness and limitations	Functional Neurology
P. A.-.-D. Forsyth, J., Graus, F., Cwik, V., Rosenblum, M. K., Posner, J. B.	1997	Motor neuron syndromes in cancer patients	Annals of neurology
P. Bigini; M. Repici; G. Cantarella; E. Fumagalli; S. Barbera; A. Cagnotto; A. De Luigi; R. Tonelli; R. Bernardini; T. Borsello; T. Mennini	2008	Recombinant human TNF-binding protein-1 (rhTBP-1) treatment delays both symptoms progression and motor neuron loss in the wobbler mouse	Neurobiology of Disease
P. Bodera	2011	Immunostimulatory oligonucleotides	Recent Patents on Inflammation and Allergy Drug Discovery
P. Christopoulos; C. Schmoor; M. Waterhouse; R. Marks; R. Wäsch; H. Bertz; J. Finke	2013	Reduced-intensity conditioning with fludarabine and thiotepa for second allogeneic transplantation of relapsed patients with AML	Bone Marrow Transplantation
P. Cohen	2001	Clinical implications of the IGF-cancer connection	Growth Hormone and IGF Research
P. Cole	2012	American Academy of Neurology 64th Annual Meeting New Orleans, Louisiana, USA - April 21-28, 2012	Drugs of the Future
P. D. H. Hamann; R. G. Cooper; N. J. McHugh; H. Chinoy	2013	Statin-induced necrotizing myositis - A discrete autoimmune entity within the statin-induced myopathy spectrum""	Autoimmunity Reviews
P. D. Shanmugarajah; J. O. S. Archer	2018	A case of hexanucleotide repeat expansion causing amyotrophic lateral sclerosis	Journal of Neuromuscular Diseases
P. E. A. Ash; K. F. Bieniek; T. F. Gendron; T. Caulfield; W. L. Lin; M. DeJesus-Hernandez; M. M. van Blitterswijk; K. Jansen-West; J. W. Paul; R. Rademakers; K. B. Boylan; D. W. Dickson; L. Petrucelli	2013	Unconventional Translation of C9ORF72 GGGGCC Expansion Generates Insoluble Polypeptides Specific to c9FTD/ALS	Neuron
P. F. C. Pradat, A.; Shefner, J.; Rothstein, J. D.; Leigh, P. N.; Morrison, K. E.; Meyer, T.; Alsarraj, S.; Peters, G.; Orrell, R.; Milleri, S.; Caress, J.; Brooks, B.; Kolb, S. J.; Lange, D.; Faulkner, J.; Abila, B.; Williams, N.; Hughes, S.; Berges, A.; Meininger, V.; Wurthner, J.	2011	A first-time-in-human study in als patients with the anti-nogo-a monoclonal antibody GSK1223249: Preliminary results	Amyotrophic Lateral Sclerosis
P. Ghezzi; A. D. Mooradian	2021	Demystifying Oxidative Stress
P. Ghezzi; T. Mennini	2001	Tumor necrosis factor and motoneuronal degeneration: An open problem	Neuroimmunomodulation
P. K. S. Krishnamurthy, E. M.	2011	Therapeutic applications of antibodies in non-infectious neurodegenerative diseases	New Biotechnology
P. L.-.-L. McGeer, M., McGeer, E. G.	2017	A review of human diseases caused or exacerbated by aberrant complement activation	Neurobiology of aging
P. Lingor; J. C. Koch; L. Tönges; M. Bähr	2012	Axonal degeneration as a therapeutic target in the CNS	Cell and Tissue Research
P. M. Lantos; J. Rumbaugh; L. K. Bockenstedt; Y. T. Falck-Ytter; M. E. Aguero-Rosenfeld; P. G. Auwaerter; K. Baldwin; R. R. Bannuru; K. K. Belani; W. R. Bowie; J. A. Branda; D. B. Clifford; F. J. DiMario; J. J. Halperin; P. J. Krause; V. Lavergne; M. H. Liang; H. Cody Meissner; L. E. Nigrovic; J. J. J. Nocton; M. C. Osani; A. A. Pruitt; J. Rips; L. E. Rosenfeld; M. L. Savoy; S. K. Sood; A. C. Ste…	2021	Clinical Practice Guidelines by the Infectious Diseases Society of America (IDSA), American Academy of Neurology (AAN), and American College of Rheumatology (ACR): 2020 Guidelines for the Prevention, Diagnosis, and Treatment of Lyme Disease	Arthritis and Rheumatology
P. N. Leigh	1991	AMYOTROPHIC-LATERAL-SCLEROSIS AND OTHER MOTOR-NEURON DISEASES	Current Opinion in Neurology and Neurosurgery
P. Panijayanond; A. P. Monaco	1974	Enhancement of pancreatic islet allograft survival with ALS and donor bone marrow	Surgical Forum
P. Patel; V. Swarup; D. Phaneuf; J. Kriz; J. P. Julien	2013	Neuroprotective effects of withaferin a in three mouse models of amyotrophic lateral sclerosis	GLIA
P. Petrou; A. Argov; V. A. Lennon; M. Gotkine; I. Kassis; A. Vaknin-Dembinsky; T. Ben-Hur; D. Offen; O. Abramsky; E. Melamed; D. Karussis	2014	Rare combination of myasthenia and motor neuronopathy, responsive to Msc-Ntf stem cell therapy	Muscle and Nerve
P. R.-.-S.-M. Andjus, Z., Cherubini, E.	1997	Immunoglobulins from motoneurone disease patients enhance glutamate release from rat hippocampal neurones in culture	The Journal of physiology
P. Riccio; R. Rossano	2019	Undigested food and gut microbiota may cooperate in the pathogenesis of neuroinflammatory diseases: A matter of barriers and a proposal on the origin of organ specificity	Nutrients
P. S. Andjus, S.; Milićević, K.; Bijelić, D.; Dučić, T.	2019	Subcellular macromolecular changes induced in rat glial cells by ALS IgGs as evidenced by synchrotron radiation-based Fourier Transform Infrared micro-spectroscopy	European Biophysics Journal
P. S. Rabinovich-Toidman, B.	2012	Beneficial effect of antibodies against beta-cleavage of APP in ALS transgenic mouse model	Journal of Molecular Neuroscience
P. S. S. Khansari, B.	2012	Inflammation in neurological and psychiatric diseases	Inflammopharmacology
P. Su; L. Poree; K. Bishoff; N. Cindy Chai; A. Shah	2020	Management of neuropathic pain using intrathecal therapy in a patient with amyotrophic lateral sclerosis	Neuromodulation
P. Timmins	2018	Industry update: The latest developments in the field of therapeutic delivery, July 2018	Therapeutic Delivery
P. Van Damme; W. Robberecht	2014	Developments in treatments for amyotrophic lateral sclerosis via intracerebroventricular or intrathecal delivery	Expert Opinion on Investigational Drugs
P. Vannucci; M. Castiglioni; M. Filidei; N. Riccioni	1997	[Amyotrophic lateral sclerosis in a patient with Waldenstrom's macroglobulinemia]	Minerva Med
P. Villoslada; B. Moreno; I. Melero; J. L. Pablos; G. Martino; A. Uccelli; X. Montalban; J. Avila; S. Rivest; L. Acarin; S. Appel; S. J. Khoury; P. McGeer; I. Ferrer; M. Delgado; J. Obeso; M. Schwartz	2008	Immunotherapy for neurological diseases	Clinical Immunology
P. Y. Li; A. Tessler; S. S. W. Han; I. Fischer; M. S. Rao; M. E. Selzer	2005	Fate of immortalized human neuronal progenitor cells transplanted in rat spinal cord	Archives of Neurology
P. Zwiegers; G. Lee; H. N. Liu; J. Robertson; C. A. Shaw	2010	Do neurotoxic insults cause misfolding of SOD1 in an animal model of sporadic ALS?	Amyotrophic Lateral Sclerosis
P.-.-J. Patel, J. P., Kriz, J.	2015	Early-stage treatment with Withaferin A reduces levels of misfolded superoxide dismutase 1 and extends lifespan in a mouse model of amyotrophic lateral sclerosis	Neurotherapeutics
P.-.-K. Patel, J., Gravel, M., Soucy, G., Bareil, C., Gravel, C., Julien, J. P.	2014	Adeno-associated virus-mediated delivery of a recombinant single-chain antibody against misfolded superoxide dismutase for treatment of amyotrophic lateral sclerosis	Molecular therapy
P.-.-M. Annunziata, D., Guazzi, G. C.	1995	Association of polyclonal anti-GM1 IgM and anti-neurofilament antibodies with CSF oligoclonal bands in a young with amyotrophic lateral sclerosis	Acta neurologica Scandinavica
P.-.-R.-N. Rabinovich-Toidman, I., Ezra, A., Barbiro, B., Fogel, H., Slutsky, I., Solomon, B.	2015	Mutant SOD1 Increases APP Expression and Phosphorylation in Cellular and Animal Models of ALS	PloS one
P.-.-S. Platania, G., Aronica, E., Troost, D., Vincenza Catania, M., Angela Sortino, M.	2005	17beta-estradiol rescues spinal motoneurons from AMPA-induced toxicity: a role for glial cells	Neurobiology of disease
P.-.-Z. Sacha, J., Barinka, C., Hlouchova, K., Vicha, A., Mlcochova, P., Hilgert, I., Eckschlager, T., Konvalinka, J.	2007	Expression of glutamate carboxypeptidase II in human brain	Neuroscience
Q. H. L. Zhou, C.; Michaelsen, M.; Mori, K.; Alterauge, D.; Baumjohann, D.; Schludi, M. H.; Greiling, J.; Farny, D.; Flatley, A.; Feederle, R.; May, S.; Schreiber, F.; Arzberger, T.; Kuhm, C.; Klopstock, T.; Hermann, A.; Haass, C.; Edbauer, D.	2017	Antibodies inhibit transmission and aggregation of C9orf72 poly-GA dipeptide repeat proteins	Embo Molecular Medicine
Q. X.-.-Z. Dong, J., Liu, S. Y., Yu, X. L., Liu, R. T.	2018	An oligomer-specific antibody improved motor function and attenuated neuropathology in the SOD1-G93A transgenic mouse model of ALS	International immunopharmacology
Q.-.-M. Zhou, N., Michaelsen, M., Parhizkar, S., Heindl, S., Nuscher, B., Farny, D., Czuppa, M., Schludi, C., Graf, A., Krebs, S., Blum, H., Feederle, R., Roth, S., Haass, C., Arzberger, T., Liesz, A., Edbauer, D.	2020	Active poly-GA vaccination prevents microglia activation and motor deficits in a C9orf72 mouse model	EMBO molecular medicine
R. A.-.-D. Bowen, S. K., Vanjani, R., Huey, E. D., Grafman, J., Horne, M. K., 3rd	2006	Markedly increased vitamin B12 concentrations attributable to IgG-IgM-vitamin B12 immune complexes	Clinical chemistry
R. A.-.-S. Towner, N.	2018	In Vivo and In Situ Detection of Macromolecular Free Radicals Using Immuno-Spin Trapping and Molecular Magnetic Resonance Imaging	Antioxidants & redox signaling
R. Alonso; D. Pisa; A. M. Fernandez-Fernandez; A. Rabano; L. Carrasco	2017	Fungal infection in neural tissue of patients with amyotrophic lateral sclerosis	Neurobiology of Disease
R. B. Banati; J. Gehrmann; M. Kellner; F. Holsboer	1995	Antibodies against microglia/brain macrophages in the cerebrospinal fluid of a patient with acute amyotrophic lateral sclerosis and presenile dementia	Clin Neuropathol
R. B.-.-G. Banati, J., Kellner, M., Holsboer, F.	1995	Antibodies against microglia/brain macrophages in the cerebrospinal fluid of a patient with acute amyotrophic lateral sclerosis and presenile dementia	Clinical neuropathology
R. D. Dayton; D. B. Wang; R. L. Klein	2012	The advent of AAV9 expands applications for brain and spinal cord gene delivery	Expert Opinion on Biological Therapy
R. D. Penn; J. S. Kroin; M. M. York; J. M. Cedarbaum	1997	Intrathecal ciliary neurotrophic factor delivery for treatment of amyotrophic lateral sclerosis (Phase I trial)	Neurosurgery
R. H. Walker	2016	The non-Huntington disease choreas Five new things	Neurology-Clinical Practice
R. Huizinga; C. Linington; S. Amor	2008	Resistance is futile: antineuronal autoimmunity in multiple sclerosis	Trends in Immunology
R. Iorio; V. Damato; A. Evoli; M. Gessi; S. Gaudino; V. Di Lazzaro; G. Spagni; J. A. Sluijs; E. M. Hol	2018	Clinical and immunological characteristics of the spectrum of GFAP autoimmunity: A case series of 22 patients	Journal of Neurology, Neurosurgery and Psychiatry
R. Isonaka; H. Hiruma; T. Katakura; T. Kawakami	2011	Motor neurons are more vulnerable to superoxide dismutase inhibition than other spinal neurons: Rescue by antioxidants	Neuroscience Research
R. Isonaka; H. Hiruma; T. Kawakami	2010	Non-phosphorylated neurofilaments are more vulnerable to superoxide dismutase inhibition than phosphorylated neurofilaments in rat spinal neurons	Neuroscience Research
R. Isonaka; T. Katakura; T. Kawakami	2012	Effect of inhibition of superoxide dismutase on motor neurons during growth: Comparison of phosphorylated and non-phosphorylated neurofilament-containing spinal neurons by histogram distribution	Brain Research
R. J. Mayer; C. Tipler; J. Arnold; L. Laszlo; A. AlKhedhairy; J. Lowe; M. Landon	1996	Endosome lysosomes, ubiquitin and neurodegeneration	Intracellular Protein Catabolism
R. K.-.-M. Sheean, F. C., Cretney, E., Bye, C. R., Perera, N. D., Tomas, D., Weston, R. A., Scheller, K. J., Djouma, E., Menon, P., Schibeci, S. D., Marmash, N., Yerbury, J. J., Nutt, S. L., Booth, D. R., Stewart, G. J., Kiernan, M. C., Vucic, S., Turner, B. J.	2018	Association of Regulatory T-Cell Expansion With Progression of Amyotrophic Lateral Sclerosis: A Study of Humans and a Transgenic Mouse Model	JAMA neurology
R. Katoh-Semba; T. Asano; H. Ueda; R. Morishita; I. K. Takeuchi; Y. Inaguma; K. Kato	2002	Riluzole enhances expression of brain-derived neurotrophic factor with consequent proliferation of granule precursor cells in the rat hippocampus	Faseb Journal
R. Khan; P. Masuta; J. Howland; S. Kothari; U. Masood; D. Landsberg	2016	Cart before the horse: Presentation of respiratory failure at onset of disease	Chest
R. Khanna; S. M. Wilson; J. M. Brittain; J. Weimer; R. Sultana; A. Butterfield; K. Hensley	2012	Opening Pandoras jar: A primer on the putative roles of CRMP2 in a panoply of neurodegenerative, sensory and motor neuron, and central disorders	Future Neurology
R. Kooijman	2006	Regulation of apoptosis by insulin-like growth factor (IGF)-I	Cytokine and Growth Factor Reviews
R. L. Juliano	2016	The delivery of therapeutic oligonucleotides	Nucleic Acids Research
R. L.-.-F. Redler, L., Fay, J. M., Caplow, M., Dokholyan, N. V.	2014	Non-native soluble oligomers of Cu/Zn superoxide dismutase (SOD1) contain a conformational epitope linked to cytotoxicity in amyotrophic lateral sclerosis (ALS)	Biochemistry
R. L.-.-G. Mosley, P. H., Hasiak, C. M., Van Wetering, F. J., Mitsumoto, H., Gendelman, H. E.	2007	Glatiramer acetate immunization induces specific antibody and cytokine responses in ALS patients	Amyotrophic lateral sclerosis
R. M. Kassa; R. Bonafede; F. Boschi; M. Bentivoglio; R. Mariotti	2017	Effect of physical exercise and anabolic steroid treatment on spinal motoneurons and surrounding glia of wild-type and ALS mice	Brain Research
R. Mackenzie; M. Kiernan; D. McKenzie; B. D. Youl	2006	Hyperimmune goat serum for amyotrophic lateral sclerosis	J Clin Neurosci
R. Mantegazza	2019	Therapeutic complement inhibition in neuroinflammatory diseases	Multiple Sclerosis Journal
R. Mares-Segura	2000	Spinal paraneoplastic syndromes	Revista De Neurologia
R. Menezes; A. Pantelyat; I. Izbudak; J. Birnbaum	2015	Movement and Other Neurodegenerative Syndromes in Patients with Systemic Rheumatic Diseases A Case Series of 8 Patients and Review of the Literature	Medicine
R. P. G. Roos, G.; Pavlouic, J.; Kromer, A.; Kay, B.	2009	Single Chain Variable Fragment Antibodies (scFvs) Against Superoxide Dismutase Type-1 (SOD1): Reagents for Investigations of the Pathogenesis of Amyotrophic Lateral Sclerosis (ALS) and for Potential Use as a Treatment	Neurology
R. Patejdl; U. K. Zettl	2012	Animal models in neurology: Drawbacks and opportunities	Current Pharmaceutical Design
R. R.-.-R. Islamov, A. A., Fedotova, V. Y., Izmailov, A. A., Safiullov, Z. Z., Garanina, E. E., Salafutdinov,, II, Sokolov, M. E., Mukhamedyarov, M. A., Palotas, A.	2017	Tandem Delivery of Multiple Therapeutic Genes Using Umbilical Cord Blood Cells Improves Symptomatic Outcomes in ALS	Molecular neurobiology
R. S. A. Tindall	1992	Immunointervention with cyclosporin A in autoimmune neurological disorders	Journal of Autoimmunity
R. Semechkin; D. Isaev; T. Abramihina; N. Turovets; R. A. West; T. Zogovic-Kapsalis; A. Semechkin	2011	Human neural stem cells of parthenogenetic origin	Molecular Therapy
R. Shah; R. Agarwal	2014	A rare case of proximal muscle weakness	Journal of General Internal Medicine
R. Sheean; F. McKay; E. Cretney; K. Scheller; N. Perera; J. Yerbury; S. Vucic; B. Turner	2015	Expansion of suppressor tregs by IL-2/IL-2 MAB complexes slows disease progression in the mutant SOD1 mouse model of ALS	Journal of Neurochemistry
R. T. Bronson; B. D. Lake; S. Cook; S. Taylor; M. T. Davisson	1993	Motor neuron degeneration of mice is a model of neuronal ceroid lipofuscinosis (Batten's disease)	Ann Neurol
R. T.-.-P. Johnson, D. L.	1980	Chronic neurological diseases: their societal burdens and potential solutions	Journal of chronic diseases
R. Tabet; L. Schaeffer; F. Freyermuth; M. Workman; C. Z. Lee; C. C. Lin; J. Jiang; K. Jansen-West; L. Petrucelli; F. Martin; C. Lagier-Tourenne	2017	ALS/FTD C9orf72 transcripts initiate translation at CUG codon and sequester ribosomal subunits	Amyotrophic Lateral Sclerosis and Frontotemporal Degeneration
R. Watanabe; S. Higashi; M. Ide; K. Oshima; K. Niizato; T. Arai	2019	Amyotrophic lateral sclerosis-associated Ataxin-2 colocalized to ribosomal protein S6 in the human brain	Brain Pathology
R. Wetts; J. E. Vaughn	2001	Development of cholinergic terminals around rat spinal motor neurons and their potential relationship to developmental cell death	Journal of Comparative Neurology
R. Wilhite; J. Sage; A. Bouzid; T. Primavera; A. Agbas	2017	Platelet phosphorylated TDP-43: an exploratory study for a peripheral surrogate biomarker development for Alzheimer's disease	Future Science Oa
R.-.-G. Zhang, R., Miller, R. G., Gelinas, D. F., Mass, J., Hadlock, K., Jin, X., Reis, J., Narvaez, A., McGrath, M. S.	2005	Evidence for systemic immune system alterations in sporadic amyotrophic lateral sclerosis (sALS)	Journal of neuroimmunology
R.-.-I. Maimon, A., Bonnie, A., Sweetat, S., Wald-Altman, S., Inbar, S., Gradus, T., Trotti, D., Weil, M., Behar, O., Perlson, E.	2018	miR126-5p Downregulation Facilitates Axon Degeneration and NMJ Disruption via a Non-Cell-Autonomous Mechanism in ALS	The Journal of neuroscience
R.-.-K. Sindhuphak, E., Conradi, S., Ronnevi, L. O.	1988	Immunoglobulins from patients with amyotrophic lateral sclerosis affect human erythrocyte acetylcholinesterase	Journal of the neurological sciences
R.-.-L. Broad, P. N.	2015	Recognising facial onset sensory motor neuronopathy syndrome: insight from six new cases	Practical neurology
R.-.-N. Ando, N., Tsujii, T., Iwaki, H., Yabe, H., Nagai, M., Nomoto, M.	2015	Human T-lymphotropic virus type-I (HTLV-I)-associated myelopathy with bulbar palsy-type amyotrophic lateral sclerosis-like symptoms	Internal medicine (Tokyo, Japan)
S. A. Bakavayev, S.; Venkatachalam, N.; Yehezkel, G.; Stavsky, A.; Barak, Z.; Israelson, A.; Engel, S.	2021	Exposure of β6/β7-Loop in Zn/Cu Superoxide Dismutase (SOD1) Is Coupled to Metal Loss and Is Transiently Reversible During Misfolding	ACS Chem Neurosci
S. A. Liddelow	2018	Neurotoxic astrocytes and potential role in MS pathogenesis	Multiple Sclerosis Journal
S. A. Smith; R. G. Miller; J. R. Murphy; S. P. Ringel	1994	Treatment of ALS with high dose pulse cyclophosphamide	Journal of the Neurological Sciences
S. Asamitsu; M. Takeuchi; S. Ikenoshita; Y. Imai; H. Kashiwagi; N. Shioda	2019	Perspectives for applying g-quadruplex structures in neurobiology and neuropharmacology	International Journal of Molecular Sciences
S. Basunaid; C. van der Grinten; N. Cobben; A. Otte; R. Sprooten; R. Gernot	2014	Case Report: Bilateral diaphragmatic dysfunction due to Borrelia Burgdorferi	F1000Research
S. Cornelis; K. Kersse; N. Festjens; M. Lamkanfi; P. Vandenabeele	2007	Inflammatory caspases: Targets for novel therapies	Current Pharmaceutical Design
S. D. Skaper	2008	The biology of neurotrophins, signalling pathways, and functional peptide mimetics of neurotrophins and their receptors	CNS and Neurological Disorders - Drug Targets
S. Fernando; L. Grad; C. Cowan; N. Cashman; J. Silverman	2016	Exosomes and microvesicles from ALS CNS tissues contain misfolded SOD1 and transmit intracellular propagated misfolding	Journal of Extracellular Vesicles
S. G. Perrin, A.; Lincecum, J.; Vieira, F.; Dezutter, J.; Wang, M.; Thompson, K.; Moreno, A.; Kidd, J.; Jiang, Y.	2012	Immune modulation as a therapeutic strategy for ALS	Amyotrophic Lateral Sclerosis
S. George; S. Paulick; I. Knuẗter; N. Rob̈er; R. Hiemann; D. Roggenbuck; K. Conrad; J. H. Kup̈per	2014	Stable expression of human muscle-specific kinase in HEp-2 M4 cells for automatic immunofluorescence diagnostics of Myasthenia gravis	PLoS ONE
S. Gnanapavan; D. Grant; G. Pryce; S. Jackson; D. Baker; G. Giovannoni	2012	Neurofilament a biomarker of neurodegeneration in autoimmune encephalomyelitis	Autoimmunity
S. Guareschi; C. Cereda; J. R. H. Brown; D. Trotti; M. Ceroni; P. Pasinelli; E. Cova	2009	Analysis of oxidatively modified WT SOD1 in patients' lymphoblasts: Implication for atoxic role of WT SOD1 in sporadic ALS	Amyotrophic Lateral Sclerosis
S. Gunawardena	2013	Nanoparticles in the brain: A potential therapeutic system targeted to an early defect observed in many neurodegenerative diseases	Pharmaceutical Research
S. H. Appel; J. I. Engelhardt; J. S. Henkel; L. Siklos; D. R. Beers; A. A. Yen; E. P. Simpson; Y. Luo; G. Carrum; H. E. Heslop; M. K. Brenner; U. Popat	2008	Hematopoietic stem cell transplantation in patients with sporadic amyotrophic lateral sclerosis	Neurology
S. H. Appel; R. G. Smith; J. I. Engelhardt; E. Stefani	1994	Evidence for autoimmunity in amyotrophic lateral sclerosis	Journal of the Neurological Sciences
S. H. Kim; S. Y. Jung; K. W. Lee; S. H. Lee; M. Cai; S. M. Choi; E. J. Yang	2013	Bee venom effects on ubiquitin proteasome system in hSOD1(G85R)-expressing NSC34 motor neuron cells	Bmc Complementary and Alternative Medicine
S. H. Minamiyama, R.; Tamaki, Y.; Shoudai, A.; Maki, T.; Tomonaga, K.; Takahasi, R.; Urushitani, M.	2018	A novel cell transplantation therapy for ALS using OPCs expressing scFv recognizing misfolded SOD1	Clinical Neurology
S. H. Mun; P. S. U. Park; K. H. Park-Min	2020	The M-CSF receptor in osteoclasts and beyond	Experimental and Molecular Medicine
S. H.-.-E. Appel, J. I., Garcia, J., Stefani, E.	1991	Immunoglobulins from animal models of motor neuron disease and from human amyotrophic lateral sclerosis patients passively transfer physiological abnormalities to the neuromuscular junction	Proceedings of the National Academy of Sciences of the United States of America
S. Hayashi; R. Yamasaki; H. Murai; K. Okamoto; J. I. Kira	2016	Early-and late-activated microglia show distinct localizations and exert different impacts on TDP-43 pathology in amyotrophic lateral sclerosis spinal cord	Amyotrophic Lateral Sclerosis and Frontotemporal Degeneration
S. Hayashi; R. Yamasaki; K. Masaki; H. Murai; K. Okamoto; J. I. Kira	2015	A certain morphology of activated microglia, which correlates with TDP-43 pathology in ALS spinal CORD	Amyotrophic Lateral Sclerosis and Frontotemporal Degeneration
S. Hayashi; R. Yamasaki; K. Masaki; H. Murai; K. Okamoto; J. I. Kira	2014	Morphological evidences of glial inflammation that confer spinal white matter degeneration of sporadic amyotrophic lateral sclerosis	Amyotrophic Lateral Sclerosis and Frontotemporal Degeneration
S. I. Rapoport	1996	Modulation of blood-brain barrier permeability	Journal of Drug Targeting
S. K. Kivity, U.; Daniel, N.; Nussinovitch, U.; Papageorgiou, N.; Shoenfeld, Y.	2010	Evidence for the use of intravenous immunoglobulins - A review of the literature	Clinical Reviews in Allergy and Immunology
S. K. Wu; C. L. Tsai; Y. Huang; K. Hynynen	2021	Focused ultrasound and microbubbles-mediated drug delivery to brain tumor	Pharmaceutics
S. Kaur; H. Sarda; R. Johnson	2012	Amyotrophic lateral sclerosis(ALS) in a patient with systemic lupus erythematosus (SLE)	Journal of Hospital Medicine
S. Khosa; A. Wu; S. K. Mishra	2019	Rare case of human T-lymphotropic virus-1 (HTLV-1) with amyotrophic lateral sclerosis	Neurology
S. Kim; A. Y. Chung; J. E. Na; S. J. Lee; S. H. Jeong; E. Kim; W. Sun; I. J. Rhyu; H. C. Park	2019	Myelin degeneration induced by mutant superoxide dismutase 1 accumulation promotes amyotrophic lateral sclerosis	GLIA
S. Kumar; N. Karthikeyan; S. Mishra; P. Padmanabhan; G. Radda; B. Gulyás	2019	Misfolded Protein Linked Strategies Toward Biomarker Development for Neurodegenerative Diseases	Molecular Neurobiology
S. L. Hernandez, A.; Rudyak, S.; Boeynaems, S.; Van Damme, P.; Van Den Bosch, L.; Rousseau, F.; Schymkowitz, J.; Robberecht, W.	2013	Nanobody against SOD1 reduces in vitro aggregation, rescues SOD1-induced axonopathy and extends survival in ALS models	Amyotrophic Lateral Sclerosis and Frontotemporal Degeneration
S. L. Perrin, J.; Thompson, K.; Vieira, F.; Wang, M.; Ferrari, A.; Sanchez, R.; Dezutter, J.; Gill, A.	2009	Anti-CD40L monoclonal antibody therapy improves disease progression and survival in a murine model of amyotrophic lateral sclerosis	Amyotrophic Lateral Sclerosis
S. M. Horwitz; R. S. Negrin; K. G. Blume; S. Breslin; M. J. Stuart; K. E. Stockerl-Goldstein; L. J. Johnston; R. M. Wong; J. A. Shizuru; S. J. Horning	2004	Rituximab as adjuvant to high-dose therapy and autologous hematopoietic cell transplantation for aggressive non-Hodgkin lymphoma	Blood
S. M. Strittmatter	2014	Overcoming drug development bottlenecks with repurposing: Old drugs learn new tricks	Nature Medicine
S. M.-.-K. Williams, G., Harris, B. T., Ravits, J., Sierks, M. R.	2017	TDP-43 protein variants as biomarkers in amyotrophic lateral sclerosis	BMC neuroscience
S. M.-.-T. Carpanini, M., Morgan, B. P.	2019	Therapeutic Inhibition of the Complement System in Diseases of the Central Nervous System	Frontiers in immunology
S. M.-.-V. Williams, L., Tian, H., Khan, G., Harris, B. T., Sierks, M. R.	2015	Novel atomic force microscopy based biopanning for isolation of morphology specific reagents against TDP-43 variants in amyotrophic lateral sclerosis	Journal of visualized experiments : JoVE
S. Milazi; A. Price; B. R. Brooks; J. L. Mougeot	2010	Gradient centrifugation enrichment of motor neurons derived from embryonic stem cells	Amyotrophic Lateral Sclerosis
S. Morimoto; M. Harada; Y. Kokubo; S. Murayama	2019	The development of the prominent immunohistochemistry method for human cholinergic neurons	Brain Pathology
S. Pozzi; P. Codron; G. Soucy; L. Renaud; P. Cordeau; K. Dutta; C. Bareil; J. P. Julien	2020	Monoclonal full-length antibody against TAR DNA binding protein 43 reduces related proteinopathy in neurons	Jci Insight
S. S. Choi; J. An; S. R. Lee; S. H. Cha; S. U. Kim; H. J. Lee	2014	Therapeutic effects of IGF1 overexpressing human adipose stem cells in ALS rat model	Molecular Therapy
S. S. Pickles, S.; Broom, H. R.; Destroismaisons, L.; Legroux, L.; Arbour, N.; Meiering, E.; Cashman, N. R.; Vande Velde, C.	2016	ALS-linked misfolded SOD1 species have divergent impacts on mitochondria	Acta Neuropathologica Communications
S. Sathasivam; P. G. Ince; P. J. Shaw	2001	Apoptosis in amyotrophic lateral sclerosis: a review of the evidence	Neuropathology and Applied Neurobiology
S. Shadfar; H. Shahheydari; S. Parakh; A. S. Laird; J. Atkin	2019	Identifying novel roles for Protein Disulfde Isomerase (PDI) in Amyotrophic Lateral Sclerosis (ALS)	Amyotrophic Lateral Sclerosis and Frontotemporal Degeneration
S. Sharma; C. S. Moon; A. Khogali; A. Haidous; A. Chabenne; C. Ojo; M. Jelebinkov; Y. Kurdi; M. Ebadi	2013	Biomarkers in Parkinson's disease (recent update)	Neurochem Int
S. Shelly; J. Mills; J. Martinez-Thompson; M. Roforth; S. Pittock; J. Mandrekar; J. Triplett; M. Mauermann; D. Dubey; C. Klein	2020	IgM-gammopathy strongly favors immune treatable MMN and MADSAM over ALS	Journal of the Peripheral Nervous System
S. Steeland; C. Libert; R. E. Vandenbroucke	2018	A new venue of TNF targeting	International Journal of Molecular Sciences
S. T. Pozzi, S. S.; Codron, P.; Rahimian, R.; Plourde, K. V.; Kriz, J.; Gravel, C.; Julien, J. P.	2019	Antibody-based therapeutic approach to target TDP-43 proteinopathy	Journal of Neurochemistry
S. T. Pozzi, S. S.; Gravel, C.; Julien, J. P.	2017	Single chain antibodies against TDP-43-RRM1 domain as therapeutic approach for TDP-43 proteinopathy	Amyotrophic Lateral Sclerosis and Frontotemporal Degeneration
S. Tzartos	2014	New autoantigens in MG	Journal of Neuromuscular Diseases
S. V. Khadilkar; M. C. Dhamne	2020	What is new in idiopathic inflammatory myopathies: Mechanisms and therapies	Annals of Indian Academy of Neurology
S. Vasiliou	2012	Highlights from the 5th joint triennial congress of the European and Americas Committees for Treatment and Research in Multiple Sclerosis (ECTRIMS/ACTRIMS)	Drugs of the Future
S. Xiao; T. Sanelli; H. Chiang; K. So; J. Keith; E. Rogaeva; J. Bilbao; L. Zinman; J. Robertson	2011	Pathological fragment of TDP-43 in als is generated by alternate translation initiation	Amyotrophic Lateral Sclerosis
S. Xiao; T. Sanelli; L. Zinman; J. Robertson	2010	RNA targets of TDP-43 identified using UV-CLIP are deregulated in ALS	Amyotrophic Lateral Sclerosis
S. Y. Hung; W. M. Fu	2017	Drug candidates in clinical trials for Alzheimer's disease	Journal of Biomedical Science
S. Y. Park; J. J. Sung; R. Wang; Y. J. Kang; J. S. Lee; J. S. Kim; B. N. Yun; J. H. Mun; B. J. Kim; S. M. Kim; Y. H. Hong; K. S. Park; D. Zhang; S. A. Lipton; K. W. Lee	2011	Synergy of erythropoietin and insulin-like growth factor-1 can deteriorate cu,zn-superoxide dismutase mutant amytorphic lateral sclerosis via activated mammalian target of rapamycin-induced autophagy inhibition	Amyotrophic Lateral Sclerosis
S. Yang; S. Warraich; K. Williams; J. Solski; G. Nicholson; I. Blair	2012	Pathology associated with a novel UBQLN2 mutation in familial ALS	Amyotrophic Lateral Sclerosis
S. Yasaki; Y. Tukamoto; N. Yuasa; T. Ohnuki; F. Yoshii	2016	Possible coexisting autoimmunity in a variant case of familial amyotrophic lateral sclerosis associated with anti-GM2 immunoglobulin M antibody	Neurology and Clinical Neuroscience
S. Zinkie; B. J. Gentil; S. Minotti; H. D. Durham	2013	Expression of the protein chaperone, clusterin, in spinal cord cells constitutively and following cellular stress, and upregulation by treatment with Hsp90 inhibitor	Cell Stress and Chaperones
S. Zou; Y. L. Lan; H. Wang; B. Zhang; Y. G. Sun	2019	The potential roles of aquaporin 4 in amyotrophic lateral sclerosis	Neurological Sciences
S.-.-B. D'Antoni, A., Seminara, G., Longone, P., Giuffrida-Stella, A. M., Battaglia, G., Sortino, M. A., Nicoletti, F., Catania, M. V.	2011	A prolonged pharmacological blockade of type-5 metabotropic glutamate receptors protects cultured spinal cord motor neurons against excitotoxic death	Neurobiology of disease
S.-.-F. Takeuchi, N., Ido, A., Oono, M., Takeuchi, Y., Tateno, M., Suzuki, K., Takahashi, R., Tooyama, I., Taniguchi, N., Julien, J. P., Urushitani, M.	2010	Induction of protective immunity by vaccination with wild-type apo superoxide dismutase 1 in mutant SOD1 transgenic mice	Journal of neuropathology and experimental neurology
S.-.-R. Conradi, L. O.	1987	Immunoglobulin-mediated cytotoxic effect of ALS-plasma towards erythrocytes: reflexion of a pathogenetic mechanism?	Advances in experimental medicine and biology
S.-.-R. Langellotti, V., Romano, G., Klima, R., Feiguin, F., Cragnaz, L., Romano, M., Baralle, F. E.	2016	A novel Drosophila model of TDP-43 proteinopathies: N-terminal sequences combined with the Q/N domain induce protein functional loss and locomotion defects	Disease models & mechanisms
S.-.-T. Pozzi, S. S., Codron, P., Rahimian, R., Plourde, K. V., Soucy, G., Bareil, C., Phaneuf, D., Kriz, J., Gravel, C., Julien, J. P.	2019	Virus-mediated delivery of antibody targeting TAR DNA-binding protein-43 mitigates associated neuropathology	The Journal of clinical investigation
S.-.-Z. Cantor, W., Delestree, N., Remedio, L., Mentis, G. Z., Burden, S. J.	2018	Preserving neuromuscular synapses in ALS by stimulating MuSK with a therapeutic agonist antibody	eLife
T. A. Mestre	2016	Chorea	CONTINUUM Lifelong Learning in Neurology
T. Ariga	2014	Pathogenic role of ganglioside metabolism in neurodegenerative diseases	Journal of neuroscience research
T. B. VanItallie	2019	Traumatic brain injury (TBI) in collision sports: Possible mechanisms of transformation into chronic traumatic encephalopathy (CTE)	Metabolism: clinical and experimental
T. Brudek; A. K. Nielsen; J. Folke; S. Owczarek; K. Svenstrup; K. Winge; B. Pakkenberg; S. Aznar	2019	Distinct autoimmune antibody responses towards TDP-43 in amyotrophic lateral sclerosis (ALS)	Amyotrophic Lateral Sclerosis and Frontotemporal Degeneration
T. C. Pappas; A. G. Bader; B. F. Andruss; D. Brown; L. P. Ford	2008	Applying small RNA molecules to the directed treatment of human diseases: Realizing the potential	Expert Opinion on Therapeutic Targets
T. Chitnis; H. L. Weiner	2017	CNS inflammation and neurodegeneration	Journal of Clinical Investigation
T. F. C. Gendron, D. M.; Petrucelli, L.	2013	c9RAN translation: a potential therapeutic target for the treatment of amyotrophic lateral sclerosis and frontotemporal dementia	Expert Opinion on Therapeutic Targets
T. F. Gendron; K. F. Bieniek; Y. J. Zhang; K. Jansen-West; P. E. A. Ash; T. Caulfield; L. Daughrity; J. H. Dunmore; M. Castanedes-Casey; J. Chew; D. M. Cosio; M. van Blitterswijk; W. C. Lee; R. Rademakers; K. B. Boylan; D. W. Dickson; L. Petrucelli	2013	Antisense transcripts of the expanded C9ORF72 hexanucleotide repeat form nuclear RNA foci and undergo repeat-associated non-ATG translation in c9FTD/ALS	Acta Neuropathologica
T. Grabowsky; O. Shukla; M. Kasoji; C. Miller; C. Merrill; W. Agnese; N. Atassi	2018	Big data analytics for early diagnosis of amyotrophic lateral sclerosis	Neurology
T. Hortobagyi	2012	C9orf72 immunohistochemistry in Alzheimer's disease	Alzheimers Research & Therapy
T. Hulett; K. Giles; M. Gowen; D. Simpson; J. Tchack; U. Moran; Z. Dawood; A. Pavlick; S. Hu; H. Zhong; M. Krogsgaard; T. Kirchhoff; I. Osman	2019	Melanoma patients harbor pre-existing IgG autoantibodies targeting neuronal proteins that associate with differential clinical outcomes following checkpoint blockade	Journal for ImmunoTherapy of Cancer
T. J.-.-S. G. Hedl, R., Cheng, F., Rayner, S. L., Davidson, J. M., De Luca, A., Villalva, M. D., Ecroyd, H., Walker, A. K., Lee, A.	2019	Proteomics Approaches for Biomarker and Drug Target Discovery in ALS and FTD	Frontiers in neuroscience
T. J.-.-W. Broering, H., Boatright, N. K., Wang, Y., Baptista, K., Shayan, G., Garrity, K. A., Kayatekin, C., Bosco, D. A., Matthews, C. R., Ambrosino, D. M., Xu, Z., Babcock, G. J.	2013	Identification of human monoclonal antibodies specific for human SOD1 recognizing distinct epitopes and forms of SOD1	PloS one
T. Kanda	2014	The 25th annual meeting of the japanese society for neuroimmunology	Clinical and Experimental Neuroimmunology
T. Kurashige; H. Morino; Y. Nagano; H. Maruyama; M. Matsumoto	2015	Rimmed vacuoles are positive for RIPK1 and RIPK3	Neuromuscular Disorders
T. Lee	2011	Three rare diagnoses in an octogenarian woman	Journal of the American Geriatrics Society
T. M. Petrozziello, A. N.; Farhan, S. M. K.; Mueller, K. A.; Granucci, E. J.; Glajch, K. E.; Chan, J.; Chew, S.; Berry, J. D.; Sadri-Vakili, G.	2020	Lipocalin-2 is increased in amyotrophic lateral sclerosis	Muscle & Nerve
T. M. Swi Chang	2005	Therapeutic applications of polymeric artificial cells	Nature Reviews Drug Discovery
T. Mennini; A. Cagnotto; L. Carvelli; D. Comoletti; C. Manzoni; V. Muzio; M. Rizzi; A. Vezzani	1999	Biochemical and pharmacological evidence of a functional role of AMPA receptors in motor neuron dysfunction in mnd mice	Eur J Neurosci
T. Nonaka; M. Masuda-Suzukake; T. Arai; Y. Hasegawa; M. Yoshida; S. Murayama; D. M. A. Mann; H. Akiyama; M. Hasegawa	2012	Intracellular seeding model reproduces characteristic features of affected neurons in TDP-43 proteinopathy	Dementia and Geriatric Cognitive Disorders
T. Nonaka; M. Suzukake; T. Arai; H. Akatsu; T. Obi; M. Yoshida; S. Murayama; D. Mann; H. Akiyama; M. Hasegawa	2013	Prion-like properties of pathological TDP-43 aggregates in diseased brains	Neuropathology
T. Parekh; S. Riaz; S. Mathew; T. Khan	2017	Isolated dropped head syndrome responsive to levodopa-a case report	Annals of Neurology
T. R. Flotte	2020	Gene Therapy Untangles the Problem of Chronic Traumatic Encephalopathy	Human Gene Therapy
T. T. Rohn	2010	The role of caspases in Alzheimer's disease; Potential novel therapeutic opportunities	Apoptosis
T. T. Rohn	2008	Caspase-cleaved TAR DNA-binding protein-43 is a major pathological finding in Alzheimer's disease	Brain research
T. Yamazaki; M. Suzuki; T. Irie; T. Watanabe; H. Mikami; S. Ono	2008	Amyotrophic lateral sclerosis associated with IgG anti-GalNAc-GDla antibodies	Clinical Neurology and Neurosurgery
T. Zaki; V. Rolston; H. Yu; S. Cohen; L. Malter	2019	Development of Creutzfeldt-Jakob disease during infliximab and ustekinumab therapy for refractory Crohn's colitis	American Journal of Gastroenterology
T. Zenone; N. Streichenberger; M. Puget	2013	Camptocormia as a clinical manifestation of polymyositis/systemic sclerosis overlap myositis associated with anti-Ku	Rheumatology International
T.-.-C. Evangelista, M., Conceicao, I., Pinto, A., de Lurdes, M., Luis, M. L.	1996	Motor neuropathies mimicking amyotrophic lateral sclerosis/motor neuron disease	Journal of the neurological sciences
T.-.-H. Fujisawa, K., Yamaguchi, N., Kadowaki, H., Tsuburaya, N., Naguro, I., Matsuzawa, A., Takeda, K., Takahashi, Y., Goto, J., Tsuji, S., Nishitoh, H., Ichijo, H.	2012	A novel monoclonal antibody reveals a conformational alteration shared by amyotrophic lateral sclerosis-linked SOD1 mutants	Annals of neurology
T.-.-S. Liewluck, D. S.	2015	Progressive Muscular Atrophy	Neurologic clinics
T.-.-S. Mutoh, G., Hamano, T., Kuriyama, M., Hirayama, M., Yamamoto, M., Mitsuma, T.	2000	Decreased phosphorylation levels of TrkB neurotrophin receptor in the spinal cords from patients with amyotrophic lateral sclerosis	Neurochemical research
T.-.-S. Yamazaki, M., Irie, T., Watanabe, T., Mikami, H., Ono, S.	2008	Amyotrophic lateral sclerosis associated with IgG anti-GalNAc-GD1a antibodies	Clinical neurology and neurosurgery
U. K. Dhand	2006	Clinical approach to the weak patient in the intensive care unit	Respiratory care
U.-.-J. Forsberg, P., Stegmayr, B.	2019	Air contamination during medical treatment results in deposits of microemboli in the lungs: An autopsy study	The International journal of artificial organs
V. A. Parfenov; O. D. Ostroumova; T. M. Ostroumova; A. I. Kochetkov; V. V. Fateeva; K. K. Khacheva; G. R. Khakimova; O. I. Epstein	2019	Vascular cognitive impairment: Pathophysiological mechanisms, insights into structural basis, and perspectives in specific treatments	Neuropsychiatric Disease and Treatment
V. C. Russo; P. D. Gluckman; E. L. Feldman; G. A. Werther	2005	The insulin-like growth factor system and its pleiotropic functions in brain	Endocrine Reviews
V. E. Groger, A.; Staege, M. S.; Cynis, H.	2021	Endogenous Retroviruses in Nervous System Disorders	Pharmaceuticals
V. H. Pomin	2015	Keratan sulfate: An up-to-date review	International Journal of Biological Macromolecules
V. K. B. Hinge, N.; Cashman, N.; Kovalenko, A.	2015	In-silico rational design and optimization of small drug leads for inhibition of prion-like propagation of SOD1 misfolding	Prion
V. Loustau; V. Foltz; C. Poulain; S. Rozenberg; G. Bruneteau	2009	Diagnosis of amyotrophic lateral sclerosis in a patient treated with TNFalpha blockers for ankylosing spondylitis: fortuitus association or new side effect of TNFalpha blockers?	Joint Bone Spine
V. X.-.-L. Tan, B., Lim, C. K., Tixador, P., Courte, J., Bessede, A., Guillemin, G. J., Peyrin, J. M.	2018	Neurotoxicity of the Cyanotoxin BMAA Through Axonal Degeneration and Intercellular Spreading	Neurotoxicity research
V.-.-G. Meininger, A., van den Berg, L. H., Robberecht, W., Ludolph, A., Chio, A., Kim, S. H., Leigh, P. N., Kiernan, M. C., Shefner, J. M., Desnuelle, C., Morrison, K. E., Petri, S., Boswell, D., Temple, J., Mohindra, R., Davies, M., Bullman, J., Rees, P., Lavrov, A.	2017	Safety and efficacy of ozanezumab in patients with amyotrophic lateral sclerosis: a randomised, double-blind, placebo-controlled, phase 2 trial	The Lancet. Neurology
V.-.-K. Bros-Facer, D., Taylor, A., Dick, J. R., Bates, S. A., Cleveland, M. S., Prinjha, R. K., Greensmith, L.	2014	Treatment with an antibody directed against Nogo-A delays disease progression in the SOD1G93A mouse model of Amyotrophic lateral sclerosis	Human molecular genetics
V.-.-P. Meininger, P. F., Corse, A., Al-Sarraj, S., Rix Brooks, B., Caress, J. B., Cudkowicz, M., Kolb, S. J., Lange, D., Leigh, P. N., Meyer, T., Milleri, S., Morrison, K. E., Orrell, R. W., Peters, G., Rothstein, J. D., Shefner, J., Lavrov, A., Williams, N., Overend, P., Price, J., Bates, S., Bullman, J., Krull, D., Berges, A., Abila, B., Meno-Tetang, G., Wurthner, J.	2014	Safety, pharmacokinetic, and functional effects of the nogo-a monoclonal antibody in amyotrophic lateral sclerosis: a randomized, first-in-human clinical trial	PloS one
V.-.-W. Venkataramani, O., Budka, H., Hartig, W., Kovacs, G. G., Bayer, T. A.	2012	Antibody 9D5 recognizes oligomeric pyroglutamate amyloid-beta in a fraction of amyloid-beta deposits in Alzheimer's disease without cross-reactivity with other protein aggregates	Journal of Alzheimer's disease : JAD
W. Brendel; J. Seifert; G. Lob	1972	The treatment of autoimmune diseases with ALG	BEHRING INST.MITT.
W. Froestl; A. Pfeifer; A. Muhs	2013	Cognitive enhancers (Nootropics). Part 3: Drugs interacting with targets other than receptors or enzymes. Disease-modifying drugs	Journal of Alzheimer's Disease
W. H. Zhao; D. R. Beers; B. Liao; J. S. Henkel; S. H. Appel	2012	Regulatory T lymphocytes from ALS mice suppress microglia and effector T lymphocytes through different cytokine-mediated mechanisms	Neurobiology of Disease
W. H. Zhao; D. R. Beers; J. S. Henkel; W. Zhang; M. Urushitani; J. P. Julien; S. H. Appel	2010	Extracellular Mutant SOD1 Induces Microglial-Mediated Motoneuron Injury	Glia
W. J. Schulte-Mattler	2008	Use of botulinum toxin a in adult neurological disorders: Efficacy, tolerability and safety	CNS Drugs
W. K. Engel	2015	Diagnostic histochemistry and clinical-pathological testings as molecular pathways to pathogenesis and treatment of the ageing neuromuscular system: A personal view	Biochimica et Biophysica Acta - Molecular Basis of Disease
W. M. Pardridge	2010	Biopharmaceutical drug targeting to the brain	Journal of Drug Targeting
W. M. Pardridge	2002	Blood-brain barrier drug targeting enables neuroprotection in brain ischemia following delayed intravenous administration of neurotrophins
W. W. F. Chang, Y. S.; Shih, Y. H.; Huang, S. H.; Chen, Y. R. R.	2018	TDP-43 OLIGOMER PATHOLOGY IN FRONTOTEMPORAL LOBAR DEMENTIA, AMYOTROPHIC LATERAL SCLEROSIS AND ALZHEIMER'S DISEASE	Alzheimer's and Dementia
W. Young	2009	Review of lithium effects on brain and blood	Cell transplantation
W. Zhao; D. Beers; J. Thonhoff; L. Ornelas; C. Svendsen; S. Appel	2018	Ipsc-derived M2-like als macrophages suppress pro-inflammatory phenotype of M1-like macrophages	Neurology
W. Zhao; D. R. Beers; S. Bell; J. Wang; S. Wen; R. H. Baloh; S. H. Appel	2015	TDP-43 activates microglia through NF-κB and NLRP3 inflammasome	Exp Neurol
W. Zhao; D. R. Beers; S. H. Appel	2013	Immune-mediated mechanisms in the pathoprogression of amyotrophic lateral sclerosis	Journal of Neuroimmune Pharmacology
W. Zhao; S. Bell; D. Beers; B. Liao; J. Henkel; R. Baloh; S. Appel	2013	TDP43-mediated microglial activation through NF-{kappa}B, AP-1 and NLRP3 inflammasome	Neurology
X.-.-D. Xu, A., Jordan, L. R., Wittenberg, N. J., Warrington, A. E., Wootla, B., Papke, L. M., Zoecklein, L. J., Yoo, D., Shaver, J., Oh, S. H., Pease, L. R., Rodriguez, M.	2015	A natural human IgM that binds to gangliosides is therapeutic in murine models of amyotrophic lateral sclerosis	Disease models & mechanisms
Y. Gilgun-Sherki; H. Panet; E. Melamed; D. Offen	2003	Riluzole suppresses experimental autoimmune encephalomyelitis: implications for the treatment of multiple sclerosis	Brain Research
Y. H. Tamaki, R.; Minamiyama, S.; Wada, H.; Shodai, A.; Tsukiyama, T.; Muramatsu, S. I.; Ema, M.; Urushitani, M.	2019	Safety evaluations of intrabody against pathogenic TDP-43 aggregates in Macaca fascicularis	Clinical Neurology
Y. J. Zhang; K. Jansen-West; Y. F. Xu; T. F. Gendron; K. F. Bieniek; W. L. Lin; H. Sasaguri; T. Caulfield; J. Hubbard; L. Daughrity; J. Chew; V. V. Belzil; M. Prudencio; J. N. Stankowski; M. Castanedes-Casey; E. Whitelaw; P. E. Ash; M. DeTure; R. Rademakers; K. B. Boylan; D. W. Dickson; L. Petrucelli	2014	Aggregation-prone c9FTD/ALS poly(GA) RAN-translated proteins cause neurotoxicity by inducing ER stress	Acta Neuropathol
Y. Minegishi; T. Iwata	2013	Distinct protein complex formation evokes insolubility of OPTN and mislocalization in iPSC-derived neural cells from E50K-POAG patients	Investigative Ophthalmology and Visual Science
Y. Motoi; K. Shimada; K. Ishiguro; S. E. Matsumoto; T. Ueno; S. Sato; N. Hattori	2012	Long-term oral lithium treatment attenuates motor disturbance in tauopathy model mice: Implications of autophagy promotion	Alzheimer's and Dementia
Y. N. Paudel; E. Angelopoulou; C. Piperi; I. Othman; M. F. Shaikh	2020	Implication of HMGB1 signaling pathways in Amyotrophic lateral sclerosis (ALS): From molecular mechanisms to pre-clinical results	Pharmacological Research
Y. Nagahara; H. Tanaka; K. Tsuruma; Y. Ono; Y. Noda; T. Nikawa; M. Shimazawa; H. Hara	2014	GPNMB resists skeletal muscle lesion in the SOD1 (G93A) mouse model of amyotrophic lateral sclerosis	Basic and Clinical Pharmacology and Toxicology
Y. Okuyama; T. Mizuno; H. Inoue; K. Kimoto	1997	Amyotrophic lateral sclerosis with anti-acetycholine receptor antibody	Internal Medicine
Y. S. Kim; T. Martinez; D. M. Deshpande; J. Drummond; K. Provost-Javier; A. Williams; J. McGurk; N. Maragakis; H. J. Song; G. L. Ming; D. A. Kerr	2006	Correction of humoral derangements from mutant superoxide dismutase 1 spinal cord	Annals of Neurology
Y. S. Tamaki, A.; Hikiami, R.; Minamiyama, S.; Morimura, T.; Ayaki, T.; Muramatsu, S. I.; Urushitani, M.	2018	Initial in vivo evaluation of biodegradable intrabody against pathogenic TDP-43 aggregates	Clinical Neurology
Y. S. Tamaki, A.; Hikiami, R.; Minamiyama, S.; Morimura, T.; Ayaki, T.; Takahashi, R.; Urushitani, M.	2017	Degradative intrabody for selective elimination of pathogenic TDP-43 aggregates in vitro and in murine embryos' cerebrum	Journal of the Neurological Sciences
Y. Shi; K. S. Park; S. H. Kim; J. Yu; K. Zhao; L. Yu; K. W. Oh; K. Lee; J. Kim; K. Chaggar; Y. Li; A. C. Dolphin; W. A. Catterall; S. H. Ryu; S. N. Yang; P. O. Berggren	2019	IgGs from patients with amyotrophic lateral sclerosis and diabetes target CaVα2δ1 subunits impairing islet cell function and survival	Proceedings of the National Academy of Sciences of the United States of America
Y. Shiina; K. Arima; H. Tabunoki; J. Satoh	2010	TDP-43 Dimerizes in Human Cells in Culture	Cellular and Molecular Neurobiology
Y. X. Xia; Z. J. Chen; G. L. Xu; D. R. Borchelt; J. I. Ayers; B. I. Giasson	2021	Novel SOD1 monoclonal antibodies against the electrostatic loop preferentially detect misfolded SOD1 aggregates	Neuroscience Letters
Y.-.-M. Okuyama, T., Inoue, H., Kimoto, K.	1997	Amyotrophic lateral sclerosis with anti-acetylcholine receptor antibody	Internal medicine (Tokyo, Japan)
Y.-.-N. Ohta, M., Nagata, T., Murakami, T., Nagano, I., Narai, H., Kurata, T., Shiote, M., Shoji, M., Abe, K.	2006	Intrathecal injection of epidermal growth factor and fibroblast growth factor 2 promotes proliferation of neural precursor cells in the spinal cords of mice with mutant human SOD1 gene	Journal of neuroscience research
Y.-.-S. Tamaki, A., Morimura, T., Hikiami, R., Minamiyama, S., Ayaki, T., Tooyama, I., Furukawa, Y., Takahashi, R., Urushitani, M.	2018	Elimination of TDP-43 inclusions linked to amyotrophic lateral sclerosis by a misfolding-specific intrabody with dual proteolytic signals	Scientific reports
Y.-.-T. Sagot, S. A., Hammang, J. P., Aebischer, P., Kato, A. C.	1996	GDNF slows loss of motoneurons but not axonal degeneration or premature death of pmn/pmn mice	The Journal of neuroscience
Z. Du; S. Valtierra; L. R. Cardona; S. F. Dunne; C. H. Luan; L. Li	2019	Identifying Anti-prion Chemical Compounds Using a Newly Established Yeast High-Throughput Screening System	Cell Chemical Biology
Z. Simmons	2011	What's in the literature?	Journal of Clinical Neuromuscular Disease
Z. Simmons	2008	Whats in the literature?	Journal of Clinical Neuromuscular Disease
Not mentionned	2017	New products and new indications in 2016: A system that favours imitation over the pursuit of real progress	Prescrire International
Not mentionned	2015	In this issue	International Immunology
Not mentionned	2013	Proteomics Clinical Applications Reviews 2013	Proteomics - Clinical Applications
Not mentionned	1993	Production of neutotrophic growth-promoting activity protein	Current Opinion in Therapeutic Patents
Not mentionned	2016	ALS Untangled No.33 Endotherapia	Amyotrophic lateral sclerosis & frontotemporal degeneration
