# Supplementary material for: Antibody-Based Therapeutic Interventions for Amyotrophic Lateral Sclerosis: A Systematic Literature Review
Source: Front Neurosci. 2021 Nov 29;15:790114. doi: 10.3389/fnins.2021.790114 (PMC8667723; doi:10.3389/fnins.2021.790114)
Supplement: Supplementary file 2 [file Table_2.XLSX]

## Sheet: Suppl. Table 2
Supplementary Table 2
Articles submitted to full text evaluation
1st author	Year	Title	Journal	Type	Considered ?	Reason for exclusion
Alexianu, M. E.	2004	Advances in neuromuscular disease 2003: the year in review	J Clin Neuromuscul Dis	Review	No	Nature
Andjus, P.	2019	Subcellular macromolecular changes induced in rat glial cells by ALS IgGs as evidenced by synchrotron radiation-based Fourier Transform Infrared micro-spectroscopy	European Biophysics Journal	Conference Abstract	No	Nature
Appel, S. H.	1991	Immunoglobulins from animal models of motor neuron disease and from human amyotrophic lateral sclerosis patients passively transfer physiological abnormalities to the neuromuscular junction	Proc Natl Acad Sci U S A	Research article	No	Finality: Ab is not used for therapy.
Ariga, T.	2014	Pathogenic role of ganglioside metabolism in neurodegenerative diseases	J Neurosci Res	Review	No	Nature and finality: Objective an Ab is not therapy.
Bady, B.	1988	[Peripheral neuropathies simulating amyotrophic lateral sclerosis in gammopathies]	Rev Neurol (Paris)	Research article	No	Availability
Bakavayev, S.	2021	Exposure of β6/β7-Loop in Zn/Cu Superoxide Dismutase (SOD1) Is Coupled to Metal Loss and Is Transiently Reversible During Misfolding	ACS Chem Neurosci	Research article	No	Finality: Ab is not used for therapy.
Battaglia, G.	2015	Activation of mGlu3 metabotropic glutamate receptors enhances GDNF and GLT-1 formation in the spinal cord and rescues motor neurons in the SOD-1 mouse model of amyotrophic lateral sclerosis	Neurobiol Dis	Research article	No	Finality: Therapy is not Ab.
Berges, A.	2015	Ozanezumab dose selection for amyotrophic lateral sclerosis by pharmacokinetic-pharmacodynamic modelling of immunohistochemistry data from patient muscle biopsies	PLoS One	Research article	No	Finality: Objective is not therapy.
Boswell, C. A.	2013	Vascular physiology and protein disposition in a preclinical model of neurodegeneration	Mol Pharm	Research article	No	Finality: Objective is not therapy.
Bowerman, M.	2015	Tweak regulates astrogliosis, microgliosis and skeletal muscle atrophy in a mouse model of amyotrophic lateral sclerosis	Hum Mol Genet	Research article	No	Finality: Objective is not therapy.
Broering, T. J.	2013	Identification of human monoclonal antibodies specific for human SOD1 recognizing distinct epitopes and forms of SOD1	PLoS One	Research article	Yes	-
Bros-Facer, V.	2014	Treatment with an antibody directed against Nogo-A delays disease progression in the SOD1G93A mouse model of Amyotrophic lateral sclerosis	Hum Mol Genet	Research article	Yes	-
Butovsky, O.	2012	Modulating inflammatory monocytes with a unique microRNA gene signature ameliorates murine ALS	J Clin Invest	Research article	No	Method and finality
Calvo, A.	2010	Involvement of immune response in the pathogenesis of amyotrophic lateral sclerosis: a therapeutic opportunity?	CNS Neurol Disord Drug Targets	Research article	No	Availability
Cammarota, A.	2001	Multifocal motor neuropathy. Immediate response to intravenous immunoglobulin	Medicina-Buenos Aires	Case report	No	Availability
Cantor, S.	2018	Preserving neuromuscular synapses in ALS by stimulating MuSK with a therapeutic agonist antibody	Elife	Research article	Yes	-
Carpanini, S. M.	2019	Therapeutic Inhibition of the Complement System in Diseases of the Central Nervous System	Front Immunol	Review	No	Nature and Finality: Not in ALS and therapy is not Ab
Chang, W. W.	2018	TDP-43 OLIGOMER PATHOLOGY IN FRONTOTEMPORAL LOBAR DEMENTIA, AMYOTROPHIC LATERAL SCLEROSIS AND ALZHEIMER'S DISEASE	Alzheimer's and Dementia	Conference Abstract	No	Nature
Chen, J. J.	2020	Overview of Current and Emerging Therapies for Amyotrophic Lateral Sclerosis	American Journal of Managed Care	Report	No	Nature: Not empirical data.
Conradi, S.	1987	Immunoglobulin-mediated cytotoxic effect of ALS-plasma towards erythrocytes: reflexion of a pathogenetic mechanism?	Adv Exp Med Biol	Research article	No	Availability
Dalakas, M. C.	1994	Effect of high-dose intravenous immunoglobulin on amyotrophic lateral sclerosis and multifocal motor neuropathy	Arch Neurol	Research article	No	Method: Lack of information.
Dalakas, M. C.	2020	Complement in neurological disorders and emerging complement-targeted therapeutics	Nature Reviews Neurology	Review	No	Nature
Deeb, O.	2020	Exploring multiple sclerosis (MS) and amyotrophic lateral sclerosis (ALS) as neurodegenerative diseases and their treatments: A review study	Current Topics in Medicinal Chemistry	Review	No	Nature
Denic, A.	2012	A recombinant human neuron-binding IgM promotes survival and protects spinal cord anterior horn cells in a transgenic murine model of amyotrophic lateral sclerosis	Annals of Neurology	Conference Abstract	No	Nature
Dinarello, C. A.	2012	Treating inflammation by blocking interleukin-1 in a broad spectrum of diseases	Nature Reviews Drug Discovery	Review	No	Nature
Dinarello, C. A.	2013	Treating inflammation by blocking interleukin-1 in humans	Seminars in Immunology	Review	No	Nature
Dong, Q.	2018	An oligomer-specific antibody improved motor function and attenuated neuropathology in the SOD1-G93A transgenic mouse model of ALS	Int Immunopharmacol	Research article	Yes	-
Evangelista, T.	1996	Motor neuropathies mimicking amyotrophic lateral sclerosis/motor neuron disease	J Neurol Sci	Research article	No	Finality: Objective is not therapy.
Fiala, M.	2013	Tocilizumab infusion therapy normalizes inflammation in sporadic ALS patients	Am J Neurodegener Dis	Research article	Yes	-
Franklin, J. P.	2020	SOD1-targeting therapies for neurodegenerative diseases: a review of current findings and future potential	Expert Opinion on Orphan Drugs	Review	No	Nature
Gendron, T. F.	2013	c9RAN translation: a potential therapeutic target for the treatment of amyotrophic lateral sclerosis and frontotemporal dementia	Expert Opinion on Therapeutic Targets	Expert opinion	No	Nature
Ghadge, G. D.	2019	Single chain variable fragment antibodies directed against SOD1 ameliorate disease in mutant SOD1 transgenic mice	Neurobiol Dis	Research article	Yes	-
Ghadge, G. D.	2013	Single chain variable fragment antibodies block aggregation and toxicity induced by familial ALS-linked mutant forms of SOD1	Neurobiol Dis	Research article	Yes	-
Gonzalez, D.	2018	The inhibition of CTGF/CCN2 activity improves muscle and locomotor function in a murine ALS model	Hum Mol Genet	Research article	Yes	-
Graber, J. J.	2009	Protective autoimmunity in the nervous system	Pharmacol Ther	Review	No	Nature and finality: Not in ALS and objective is not therapy.
Gravel, M.	2016	IL-10 Controls Early Microglial Phenotypes and Disease Onset in ALS Caused by Misfolded Superoxide Dismutase 1	J Neurosci	Research article	No	Finality: Ab is not used for therapy.
Grimm, J.	2016	Human-derived monoclonal antibodiesforalzheimer's disease and related proteinopathies	Neurobiology of Aging	Conference Abstract	No	Nature
Grimm, J.	2017	Development of human antibodies for the treatment of protein aggregation diseases	Journal of Translational Medicine	Conference Abstract	No	Nature
Groger, V.	2021	Endogenous Retroviruses in Nervous System Disorders	Pharmaceuticals	Review	No	Nature
Gros-Louis, F.	2010	Intracerebroventricular infusion of monoclonal antibody or its derived Fab fragment against misfolded forms of SOD1 mutant delays mortality in a mouse model of ALS	J Neurochem	Research article	Yes	-
Gros-Louis, F.	2009	Development of immunization approaches to amyotrophic lateral sclerosis	Future Neurology	Review	No	Nature and availability.
Gunawardena, S.	2013	Nanoparticles in the brain: A potential therapeutic system targeted to an early defect observed in many neurodegenerative diseases	Pharmaceutical Research	Review	No	Nature
Hernandez, S.	2013	Nanobody against SOD1 reduces in vitro aggregation, rescues SOD1-induced axonopathy and extends survival in ALS models	Amyotrophic Lateral Sclerosis and Frontotemporal Degeneration	Conference Abstract	No	Nature
Hinge, V. K.	2015	In-silico rational design and optimization of small drug leads for inhibition of prion-like propagation of SOD1 misfolding	Prion	Conference Abstract	No	Nature
Holzbaur, E. L.	2006	Myostatin inhibition slows muscle atrophy in rodent models of amyotrophic lateral sclerosis	Neurobiol Dis	Research article	Yes	-
Huang, G.	2013	Death receptor 6 (DR6) antagonist antibody is neuroprotective in the mouse SOD1G93A model of amyotrophic lateral sclerosis	Cell Death Dis	Research article	Yes	-
Ido, A.	2011	Protein misdirection inside and outside motor neurons in Amyotrophic Lateral Sclerosis (ALS): a possible clue for therapeutic strategies	Int J Mol Sci	Review	No	Nature
Julien, J. P.	2012	Immunotherapy in amyotrophic lateral sclerosis	European Neuropsychopharmacology	Conference Abstract	No	Nature
Julien, J. P.	2015	Single chain recombinant antibodies to target TDP-43 interactions	Journal of Neurochemistry	Conference Abstract	No	Nature
Khansari, P. S.	2012	Inflammation in neurological and psychiatric diseases	Inflammopharmacology	Review/special edition	No	Nature
Khosravi, B.	2020	Cell-to-cell transmission of C9orf72 poly-(Gly-Ala) triggers key features of ALS/FTD	Embo j	Research article	Yes	-
Kivity, S.	2010	Evidence for the use of intravenous immunoglobulins - A review of the literature	Clinical Reviews in Allergy and Immunology	Review	No	Nature
Kornberg, A.	1995	Chronic motor neuropathies: diagnosis, therapy, and pathogenesis	Ann Neurol	Research article	No	Availability
Krishnamurthy, P. K.	2011	Therapeutic applications of antibodies in non-infectious neurodegenerative diseases	New Biotechnology	Review	No	Nature
Kunbaz, A.	2018	A natural human monoclonal antibody protects from axonal injury in different CNS degenerative disease models	Future Neurology	Special report	No	Nature: Not empirical data.
Lam, L.	2016	Epigenetic changes in T-cell and monocyte signatures and production of neurotoxic cytokines in ALS patients	Faseb j	Research article	Yes	-
Lavrov, A.	2015	A phase II study of ozanezumab in amyotrophic lateral sclerosis	Annals of Neurology	Conference Abstract	No	Nature
Lee, J. D.	2019	Therapeutic blockade of HMGB1 reduces early motor deficits, but not survival in the SOD1(G93A) mouse model of amyotrophic lateral sclerosis	J Neuroinflammation	Research article	Yes	-
Lehmann, M.	2020	Aggregate-selective antibody attenuates seeded aggregation but not spontaneously evolving disease in SOD1 ALS model mice	Acta Neuropathologica Communications	Research article	Yes	-
Lincecum, J. M.	2010	From transcriptome analysis to therapeutic anti-CD40L treatment in the SOD1 model of amyotrophic lateral sclerosis	Nat Genet	Research article	Yes	-
Ludemann, N.	2005	O-glycosylation of the tail domain of neurofilament protein M in human neurons and in spinal cord tissue of a rat model of amyotrophic lateral sclerosis (ALS)	J Biol Chem	Research article	No	Finality: Objective is not therapy.
Lynch, A. M.	2015	Non-clinical development of ozanezumab: a humanised antibody targeting the amino terminus of neurite outgrowth inhibitor A (Nogo-A)	Toxicology Research	Research article	No	Finality: Objective is not therapy.
Maier, M.	2018	A human-derived antibody targets misfolded SOD1 and ameliorates motor symptoms in mouse models of amyotrophic lateral sclerosis	Sci Transl Med	Research article	Yes	-
Maimon, R.	2018	miR126-5p Downregulation Facilitates Axon Degeneration and NMJ Disruption via a Non-Cell-Autonomous Mechanism in ALS	J Neurosci	Research article	No	Finality: Objective is not therapy.
Malpass, K.	2012	Motor neuron disease: Inflammatory monocytes-a novel therapeutic target for ALS?	Nature Reviews Neurology	Note	No	Nature
McCampbell, A.	2013	Administration of antibodies for misfolded SOD1 prolong survival in the SOD1-G93A mouse	Amyotrophic Lateral Sclerosis and Frontotemporal Degeneration	Conference Abstract	No	Nature
McGeer, P. L.	2017	A review of human diseases caused or exacerbated by aberrant complement activation	Neurobiol Aging	Review	No	Nature and finality: Objective is not therapy.
Meininger, V.	2017	Safety and efficacy of ozanezumab in patients with amyotrophic lateral sclerosis: a randomised, double-blind, placebo-controlled, phase 2 trial	Lancet Neurol	Clinical Trial	Yes	-
Meininger, V.	2014	Safety, pharmacokinetic, and functional effects of the nogo-a monoclonal antibody in amyotrophic lateral sclerosis: a randomized, first-in-human clinical trial	PLoS One	Clinical Trial	Yes	-
Messer, A.	2020	Optimizing intracellular antibodies (intrabodies/nanobodies) to treat neurodegenerative disorders	Neurobiol Dis	Review	No	Nature
Meucci, N.	1996	Intravenous immunoglobulin therapy in amyotrophic lateral sclerosis	J Neurol	Research article	No	Method
Meyer, K. D.	2018	Human antibodies engage intraneuronal C9ORF72 dipeptide repeat proteins	Amyotrophic Lateral Sclerosis and Frontotemporal Degeneration	Conference Abstract	No	Nature
Minamiyama, S.	2018	A novel cell transplantation therapy for ALS using OPCs expressing scFv recognizing misfolded SOD1	Clinical Neurology	Conference Abstract	No	Nature
Nguyen, L.	2018	Antibody therapy targeting RAN proteins rescues ALS/FTD in C9orf72, BAC mice	Amyotrophic Lateral Sclerosis and Frontotemporal Degeneration	Conference Abstract	No	Nature
Nguyen, L.	2020	Antibody Therapy Targeting RAN Proteins Rescues C9 ALS/FTD Phenotypes in C9orf72 Mouse Model	Neuron	Research article	Yes	-
Ohnari, K.	2018	Late-onset Myasthenia Gravis Accompanied by Amyotrophic Lateral Sclerosis with Antibodies against the Acetylcholine Receptor and Low-density Lipoprotein Receptor-related Protein 4	Intern Med	Case report	No	Finality
Otsmane, B.	2014	Cerebrospinal fluid-targeted delivery of neutralizing anti-IFNgamma antibody delays motor decline in an ALS mouse model	Neuroreport	Research article	Yes	-
Panza, F.	2020	Development of disease-modifying drugs for frontotemporal dementia spectrum disorders	Nat Rev Neurol	Review	No	Nature
Patel, A.	2020	Newer Immunotherapies for the Treatment of Acute Neuromuscular Disease in the Critical Care Unit	Curr Treat Options Neurol	Review	No	Nature
Patel, P.	2014	Adeno-associated virus-mediated delivery of a recombinant single-chain antibody against misfolded superoxide dismutase for treatment of amyotrophic lateral sclerosis	Mol Ther	Research article	Yes	-
Patin, F.	2016	Interleukin-6 blockade improves inflammatory but not metabolic condition in ALS	Amyotrophic Lateral Sclerosis and Frontotemporal Degeneration	Conference Abstract	No	Nature
Patin, F.	2015	Metabolic and immunologic effects of anti-interleukin-6 receptor antibody (MR16-1) in SOD1(G93A) mouse model of amyotrophic lateral sclerosis	Amyotrophic Lateral Sclerosis and Frontotemporal Degeneration	Conference Abstract	No	Nature
Perrin, S.	2012	Immune modulation as a therapeutic strategy for ALS	Amyotrophic Lateral Sclerosis	Conference Abstract	No	Nature
Perrin, S.	2009	Anti-CD40L monoclonal antibody therapy improves disease progression and survival in a murine model of amyotrophic lateral sclerosis	Amyotrophic Lateral Sclerosis	Conference Abstract	No	Nature
Petrozziello, T.	2020	Lipocalin-2 is increased in amyotrophic lateral sclerosis	Muscle & Nerve	Research article	No	Finality: No antibody therapy.
Piccirillo, G.	2016	Intravenous immunoglobulins efficacy in a case of ALS with myasthenic symptoms	European Journal of Neurology	Conference Abstract	No	Nature
Pickles, S.	2016	ALS-linked misfolded SOD1 species have divergent impacts on mitochondria	Acta Neuropathologica Communications	Research article	No	Finality: No antibody therapy.
Pokrishevsky, E.	2017	Spinal cord homogenates from SOD1 familial amyotrophic lateral sclerosis induce SOD1 aggregation in living cells	PLoS One	Research article	Yes	-
Pokrishevsky, E.	2014	Misfolded wild-type SOD1 induced by pathological FUS or TDP-43 transmits intercellularly and is propagated misfolding-competent	American Journal of Neurodegenerative Diseases	Conference Abstract	No	Nature
Pokrishevsky, E..	2015	Misfolded wild-type SOD1 induced by pathological FUS or TDP-43 transmits intercellularly and is propagation-competent	Prion	Conference Abstract	No	Nature
Pozzi, S.	2019	Virus-mediated delivery of antibody targeting TAR DNA-binding protein-43 mitigates associated neuropathology	J Clin Invest	Research article	Yes	-
Pozzi, S.	2020	Monoclonal full-length antibody against TAR DNA binding protein 43 reduces related proteinopathy in neurons	Jci Insight	Research article	Yes	-
Pozzi, S.	2017	Single chain antibodies against TDP-43-RRM1 domain as therapeutic approach for TDP-43 proteinopathy	Amyotrophic Lateral Sclerosis and Frontotemporal Degeneration	Conference Abstract	No	Nature
Pozzi, S.	2019	Antibody-based therapeutic approach to target TDP-43 proteinopathy	Journal of Neurochemistry	Conference Abstract	No	Nature
Pradat, P. F.	2011	A first-time-in-human study in als patients with the anti-nogo-a monoclonal antibody GSK1223249: Preliminary results	Amyotrophic Lateral Sclerosis	Conference Abstract	No	Nature
Rabinovich-Toidman, P.	2012	Beneficial effect of antibodies against beta-cleavage of APP in ALS transgenic mouse model	Journal of Molecular Neuroscience	Conference Abstract	No	Nature
Ranum, L.	2019	Targeting ran proteins improves phenotypes in C9ORF72 BAC ALS/FTD mice	Journal of Neurochemistry	Conference Abstract	No	Nature
Rewald, E.	1994	Intrathecal IgG for ALS	Neurology	Research article	No	Availability
Robert, M. A.	2017	Antibody Delivery Mediated by Recombinant Adeno-associated Virus for the Treatment of Various Chronic and Infectious Diseases	Curr Gene Ther	Research article	No	Availability
Rodriguez, M.	2016	Human recombinant monoclonal antibodies as therapy for demyelinating and degenerative CNS disorders	Multiple Sclerosis	Conference Abstract	No	Nature
Rogers, M. L.	2014	Non-viral gene therapy that targets motor neurons in vivo	Front Mol Neurosci	Research article	No	Finality: Ab is not used for therapy.
Roos, R. P.	2009	Single Chain Variable Fragment Antibodies (scFvs) Against Superoxide Dismutase Type-1 (SOD1): Reagents for Investigations of the Pathogenesis of Amyotrophic Lateral Sclerosis (ALS) and for Potential Use as a Treatment	Neurology	Not mentionned	No	Availability
Schoonaert, L.	2017	Identification and characterization of Nanobodies targeting the EphA4 receptor	J Biol Chem	Research article	No	Finality: Objective is not therapy. Not directly in ALS.
Sengupta-Ghosh, A.	2019	Muscle specific kinase (MuSK) activation preserves neuromuscular junctions in the diaphragm but is not sufficient to provide a functional benefit in the SOD1(G93A) mouse model of ALS	Neurobiol Dis	Research article	Yes	-
Sheean, R. K.	2018	Association of Regulatory T-Cell Expansion With Progression of Amyotrophic Lateral Sclerosis: A Study of Humans and a Transgenic Mouse Model	JAMA Neurol	Research article	No	Finality: Therapy is not Ab.
Solomon, B.	2013	App a common target for neuropathology treatment	Alzheimer's and Dementia	Conference Abstract	No	Nature
Tamaki, Y.	2018	Elimination of TDP-43 inclusions linked to amyotrophic lateral sclerosis by a misfolding-specific intrabody with dual proteolytic signals	Sci Rep	Research article	Yes	-
Tamaki, Y.	2019	Safety evaluations of intrabody against pathogenic TDP-43 aggregates in Macaca fascicularis	Clinical Neurology	Conference Abstract	No	Nature
Tamaki, Y.	2017	Degradative intrabody for selective elimination of pathogenic TDP-43 aggregates in vitro and in murine embryos' cerebrum	Journal of the Neurological Sciences	Conference Abstract	No	Nature
Tamaki, Y.	2018	Initial in vivo evaluation of biodegradable intrabody against pathogenic TDP-43 aggregates	Clinical Neurology	Conference Abstract	No	Nature
Terenghi, F.	2006	Circulating levels of cytokines and their modulation by intravenous immunoglobulin in multifocal motor neuropathy	J Peripher Nerv Syst	Research article	No	Finality: Ab and objective is not therapy.
Thonhoff, J. R.	2018	Neuroinflammatory mechanisms in amyotrophic lateral sclerosis pathogenesis	Curr Opin Neurol	Research article	No	Availability
Tsuji, H.	2012	Epitope mapping of antibodies against TDP-43 and detection of protease-resistant fragments of pathological TDP-43 in amyotrophic lateral sclerosis and frontotemporal lobar degeneration	Biochem Biophys Res Commun	Research article	No	Finality: Objective is not therapy.
Urushitani, M.	2007	Therapeutic effects of immunization with mutant superoxide dismutase in mice models of amyotrophic lateral sclerosis	Proc Natl Acad Sci U S A	Research article	Yes	-
Urushitani, M.	2010	Immunotherapy of amyotrophic lateral sclerosis	Neuroscience Research	Conference Abstract	No	Nature
VanItallie, T. B.	2019	Traumatic brain injury (TBI) in collision sports: Possible mechanisms of transformation into chronic traumatic encephalopathy (CTE)	Metabolism	Research article	No	Finality: Not realated to subject.
Venkova, K.	2014	Semaphorin 3A signaling through neuropilin-1 is an early trigger for distal axonopathy in the SOD1G93A mouse model of amyotrophic lateral sclerosis	J Neuropathol Exp Neurol	Research article	Yes	-
Walsh, F. S.	2012	Myostatin as a therapeutic target in Amyotrophic Lateral Sclerosis	Neurochemistry International	Review	No	Nature
Williams, S. M.	2017	TDP-43 protein variants as biomarkers in amyotrophic lateral sclerosis	BMC Neurosci	Research article	No	Finality: Objective is not therapy.
Wootla, B.	2015	Naturally Occurring Monoclonal Antibodies and Their Therapeutic Potential for Neurologic Diseases	JAMA Neurol	Review	No	Nature Interesting part cite Gros-Louis and Xu
Wright, B. R.	2009	Cellular Mechanisms of Central Nervous System Repair by Natural Autoreactive Monoclonal Antibodies	Archives of Neurology	Review	No	Nature
Xia, Y. X.	2021	Novel SOD1 monoclonal antibodies against the electrostatic loop preferentially detect misfolded SOD1 aggregates	Neuroscience Letters	Research article	No	Finality
Xu, X.	2015	A natural human IgM that binds to gangliosides is therapeutic in murine models of amyotrophic lateral sclerosis	Dis Model Mech	Research article	Yes	-
Yamazaki, T.	2008	Amyotrophic lateral sclerosis associated with IgG anti-GalNAc-GD1a antibodies	Clin Neurol Neurosurg	Case report	No	Finality: Objective is not therapy.
Zhao, B.	2019	Therapeutic vaccines for amyotrophic lateral sclerosis directed against disease specific epitopes of superoxide dismutase 1	Vaccine	Research article	No	Finality: Therapy is not Ab (active immunization).
Zhou, Q.	2017	Antibodies inhibit transmission and aggregation of C9orf72 poly-GA dipeptide repeat proteins	EMBO Mol Med	Research article	Yes	-
Zhou, Q.	2020	Active poly-GA vaccination prevents microglia activation and motor deficits in a C9orf72 mouse model	EMBO Mol Med	Research article	No	Finality: Therapy is not Ab (active immunization).
